1 **Title: Snx14 proximity labeling reveals a role in saturated fatty acid metabolism**  
2 **and ER homeostasis defective in SCAR20 disease**

3  
4 **Author Line:**

5 Sanchari Datta<sup>1</sup>, Jade Bowerman<sup>1</sup>, Hanaa Hariri<sup>1</sup>, Rupali Ugrankar<sup>1</sup>, Kaitlyn M.  
6 Eckert<sup>2</sup>, Chase Corley<sup>2</sup>, Gonçalo Vale<sup>2</sup>, Jeffrey G. McDonald<sup>2</sup>, Mike Henne<sup>1,\*</sup>

7  
8 **Author Affiliation:**

9 <sup>1</sup>Department of Cell Biology, UT Southwestern Medical Center, 6000 Harry Hines  
10 Blvd, Dallas, TX 75390; <sup>2</sup>Department of Molecular Genetics, UT Southwestern  
11 Medical Center, 6000 Harry Hines Blvd, Dallas, TX 75390

12  
13 **Corresponding author:**

14 Correspondence should be addressed to: [mike.henne@utsouthwestern.edu](mailto:mike.henne@utsouthwestern.edu)

15  
16 **Key words:**

17 Endoplasmic reticulum (ER); fatty acid (FA); lipid droplet (LD); sorting nexin (SNX);  
18 autosomal recessive spinocebellar ataxia 20 (SCAR20)

19  
20  
21  
22  
23  
24  
25  
26  
27  
28  
29  
30  
31  
32  
33  
34  
35  
36  
37  
38  
39  
40  
41  
42  
43  
44  
45  
46  
47

48 **Abstract:**

49 Fatty acids (FAs) are central cellular metabolites that contribute to lipid synthesis,  
50 and can be stored or harvested for metabolic energy. Dysregulation in FA processing  
51 and storage causes toxic FA accumulation or altered membrane compositions and  
52 contributes to metabolic and neurological disorders. Saturated lipids are particularly  
53 detrimental to cells, but how lipid saturation levels are maintained remains poorly  
54 understood. Here, we identify the cerebellar ataxia SCAR20-associated protein  
55 Snx14, an endoplasmic reticulum (ER)-lipid droplet (LD) tethering protein, as a novel  
56 factor required to maintain the lipid saturation balance of cell membranes. We show  
57 that *SNX14*<sup>KO</sup> cells and SCAR20 disease patient-derived cells are hypersensitive to  
58 saturated FA (SFA)-mediated lipotoxic cell death that compromises ER integrity.  
59 Using APEX2-based proximity labeling, we reveal the protein composition of Snx14-  
60 associated ER-LD contacts and define a functional interaction between Snx14 and  
61  $\Delta$ -9 FA desaturase SCD1. Lipidomic profiling reveals that *SNX14*<sup>KO</sup> cells increase  
62 membrane lipid saturation following exposure to palmitate, phenocopying cells with  
63 reduced SCD1 activity. In line with this, *SNX14*<sup>KO</sup> cells manifest delayed FA  
64 processing and lipotoxicity, which can be rescued by SCD1 over-expression.  
65 Altogether these mechanistic insights reveal a role for Snx14 in FA and ER  
66 homeostasis, defects in which may underlie the neuropathology of SCAR20.

67

68 **Significance Statement:**

69 SCAR20 disease is an autosomal recessive spinocerebellar ataxia primarily affecting  
70 children, and results from loss-of-function mutations in the *SNX14* gene. Snx14 is an  
71 endoplasmic reticulum (ER)-localized protein that localizes to ER-lipid droplet (LD)  
72 contacts and promotes LD biogenesis following exogenous FA treatment, but why  
73 Snx14 loss causes SCAR20 is unclear. Here, we demonstrate that following  
74 exposure to saturated fatty acids, Snx14-deficient cells have defective ER  
75 homeostasis and altered lipid saturation profiles. We reveal a functional interaction  
76 between Snx14 and fatty acid (FA) desaturase SCD1. Lipidomics shows Snx14-  
77 deficient cells contain elevated saturated lipids, closely mirroring SCD1-defective  
78 cells. Furthermore, SCD1 over-expression can rescue Snx14 loss. We propose that  
79 Snx14 maintains cellular lipid homeostasis, the loss of which underlies the cellular  
80 basis for SCAR20 disease.

81

82

83

84

85

86

87

88

89

90

91

## 92 Introduction

93

94 Cells regularly internalize exogenous fatty acids (FAs), and must remodel their  
95 metabolic pathways to process and properly store FA loads. As a central cellular  
96 currency that can be stored, incorporated into membrane lipids, or harvested for  
97 energy, cells must balance FA uptake, processing, and oxidation to maintain  
98 homeostasis. Defects in any of these elevates intracellular free fatty acids which can  
99 act as detergents and damage organelles. Excessive membrane lipid saturation can  
100 also alter organelle function and contribute to cellular pathology, known as  
101 lipotoxicity [1, 2]. Failure to properly maintain lipid compositions and storage  
102 contributes to many metabolic disorders [3] including type 2 diabetes [4], obesity [5],  
103 cardiac failure [6, 7] and various neurological diseases [8].

104

105 Properties of FAs such as their degree of saturation and chain length are key  
106 determinants of their fate within the cell [9]. High concentrations of saturated FAs  
107 (SFAs) in particular are highly toxic, as their incorporation into organelles affects  
108 membrane fluidity and can trigger lipotoxicity and cell death [10-13]. To prevent this,  
109 cells desaturate SFAs into mono-unsaturated FAs (MUFAs) before they are  
110 subsequently incorporated into membrane glycerophospholipids or stored as  
111 triglycerides (TG) in lipid droplets (LDs). LD production provides a lipid reservoir to  
112 sequester otherwise toxic FAs, providing a metabolic buffer to maintain lipid  
113 homeostasis [14, 15].

114

115 As LDs are created by and emerge from the ER network, inter-organelle  
116 communication between the ER and LDs is vital for LD biogenesis [16].  
117 Consequently numerous proteins that contribute to LD biogenesis, such as seipin  
118 [17, 18] and the diacylglyceride acyltransferase (DGAT) [19], are implicated in ER-  
119 LD crosstalk. Previously, we identified Snx14, a sorting nexin (SNX) protein linked to  
120 the cerebellar ataxia disease SCAR20 [20-22], as a novel factor that promotes FA-  
121 stimulated LD growth at ER-LD contacts [23, 24]. Snx14 is an ER-anchored integral  
122 membrane protein. During periods of elevated FA flux, Snx14 is recruited to ER-LD  
123 contact sites where it promotes the incorporation of FAs into TG as LDs grow [23]. In  
124 line with this, *SNX14*<sup>KO</sup> cells exhibit defective LD morphology following oleate  
125 addition, implying Snx14 is required for proper FA storage in LDs. Related studies of  
126 Snx14 homologs in yeast and *Drosophila* indicate a conserved role for Snx14 family  
127 proteins in FA homeostasis and LD biogenesis [25, 26].

128

129 Despite these insights, why humans with Snx14 loss-of-function mutations develop  
130 the cerebellar ataxia disease SCAR20 remains enigmatic. Given the proposed role  
131 of Snx14 in lipid metabolism, and that numerous neurological pathologies arise  
132 through defects in ER lipid homeostasis [27-29], here we investigated whether  
133 Snx14 loss alters the ability of cells to maintain lipid homeostasis in response to FA  
134 influx. Our findings indicate that Snx14-deficient cells are hypersensitive to SFA

135 exposure, and manifest defects in ER morphology and ER-associated lipid  
136 metabolism.

137

## 138 **Results:**

139

### 140 ***SNX14*<sup>KO</sup> cells are hypersensitive to saturated fatty acid associated lipotoxicity**

141

142 Previously, we showed that following oleate addition, Snx14 enriches at ER-  
143 LD contacts to promote LD growth, and Snx14 loss disrupts LD homeostasis [23]. To  
144 further dissect Snx14 function in maintaining lipid homeostasis, we interrogated how  
145 *SNX14*<sup>KO</sup> cells respond to exposure to various saturated and unsaturated FAs. We  
146 exposed wildtype (WT) or *SNX14*<sup>KO</sup> U2OS cells to titrations of specific SFAs or  
147 MUFAs for 48 hours, and monitored cell viability using an established crystal violet  
148 assay [30, 31]. Exposure to MUFAs including palmitoleate (16:1) and oleate (18:1)  
149 did not perturb cell viability of either WT or *SNX14*<sup>KO</sup> cells even at 1000 $\mu$ M  
150 concentrations (**Fig 1 A, A'**). In contrast, treatment of WT cells with increasing  
151 concentrations of SFAs such as palmitate (16:0) or stearate (18:0) resulted in  
152 decreased cell survival, as previously reported [13, 32] (**Fig 1 B, B'**).

153 Intriguingly, *SNX14*<sup>KO</sup> U2OS cells were hyper-sensitive to SFA-induced death  
154 compared to WT cells (**Fig 1 B, B'**). The concentration of palmitate at which ~50% of  
155 WT cells survive is ~1000 $\mu$ M, but only ~500 $\mu$ M for *SNX14*<sup>KO</sup> (**Fig 1B**). Similarly,  
156 exposure to ~600 $\mu$ M stearate resulted in ~50% cell viability for WT cells, but only  
157 required ~300 $\mu$ M for *SNX14*<sup>KO</sup> (**Fig 1B'**). Consistent with this, SCAR20 patient-  
158 derived fibroblasts [20, 24] which are homozygous for loss-of-function Snx14  
159 mutations exhibited significantly reduced cell viability compared to control fibroblasts  
160 following palmitate addition (**Fig 1C**). SCAR20 patient cells exhibited ~50% viability  
161 at ~1000 $\mu$ M palmitate exposure, whereas more than 50% WT cells were viable even  
162 at 2000 $\mu$ M palmitate treatment. Collectively, these observations indicate that Snx14-  
163 deficient cells are hyper-sensitive to SFA exposure.

164 Once internalized, free FAs (FFAs) are esterified and shunted into several  
165 distinct metabolic fates, including their incorporation into ceramides [33],  
166 glycerophospholipids [34], or neutral lipids[35]. They can also be harvested by  
167 catabolic breakdown in oxidative organelles like mitochondria [2]. To begin to dissect  
168 why *SNX14*<sup>KO</sup> cells were hyper-sensitive to SFAs, we conducted a systemic analysis  
169 of each FA-associated pathway. Since intracellular ceramide accumulation can itself  
170 be toxic [33], we tested whether pharmacologically lowering ceramide synthesis  
171 could rescue *SNX14*<sup>KO</sup> SFA-associated toxicity. We treated cells with myriocin,  
172 which inhibits the SPT complex that incorporates palmitate into newly synthesized  
173 ceramides [10]. Myriocin treatment did not rescue *SNX14*<sup>KO</sup> SFA hypersensitivity,  
174 suggesting that elevated ceramides does not contribute to *SNX14*<sup>KO</sup> palmitate-  
175 induced cell death (**Fig 1D**). Next, we examined whether mitochondrial FA oxidation  
176 was required for *SNX14*<sup>KO</sup> hypersensitivity by treating cells with etomoxir that inhibits  
177 mitochondrial FA uptake [36, 37]. This did not suppress palmitate-induced lipotoxicity

178 in *SNX14*<sup>KO</sup> cells, indicating perturbed mitochondrial FA oxidation is likely not  
179 causative of Snx14-associated lipotoxicity (**Fig 1E**).

180

## 181 **SFA-induced lipotoxicity in *SNX14*<sup>KO</sup> cells is associated with defects in ER** 182 **morphology**

183

184 A major FA destination is their incorporation into membrane  
185 glycerophospholipids via *de novo* lipid synthesis at the ER. Excessive SFA  
186 incorporation into diacyl-glycerophospholipids can impact ER membrane fluidity and  
187 drive cellular stress [12, 38]. To determine whether SFA exposure affected ER  
188 homeostasis in *SNX14*<sup>KO</sup> cells, we examined ER morphology of WT and *SNX14*<sup>KO</sup>  
189 cells exposed to palmitate via fluorescence confocal microscopy. Whereas the  
190 immunofluorescently stained ER network of WT cells was reticulated and regular  
191 following overnight exposure to 500 $\mu$ M palmitate, *SNX14*<sup>KO</sup> cells displayed perturbed  
192 ER morphology. The ER of *SNX14*<sup>KO</sup> cells appeared fragmented, and contained  
193 drastic bulges within the tubular network following palmitate treatment (**Fig 2A; red**  
194 **arrows**). A subpopulation of *SNX14*<sup>KO</sup> cells even exhibited solubilized ER lumen  
195 marker in the cytoplasm, suggesting drastic defects in ER integrity. We quantified  
196 these ER morphological alterations into distinct classes (**Fig 2A,B; white arrows**  
197 **indicating ER morphology of each class**), revealing ~70% of *SNX14*<sup>KO</sup> cells  
198 exhibited irregular or fragmented ER structure following palmitate exposure,  
199 compared to only ~22% of WT (**Fig 2B**). These perturbations became more  
200 prominent when examining ER ultrastructure with transmission electron microscopy  
201 (TEM). Here, WT and *SNX14*<sup>KO</sup> cells were either left untreated or cultured in media  
202 containing 500 $\mu$ M of palmitate for 6hrs or 16hrs. Even with palmitate, WT cells  
203 exhibited normal tubular ER networks and did not manifest any significant change in  
204 the ER morphology (**Fig 2C**). *SNX14*<sup>KO</sup> cells not exposed to palmitate also exhibited  
205 normal ER morphology. However, the ER of *SNX14*<sup>KO</sup> cells exposed to 6hrs  
206 palmitate appeared swollen and dilated, forming sheet-like extensions within the thin-  
207 section plain (**Fig 2C; red arrows**). This ER dilation was more pronounced following  
208 16hrs treatment (**Fig 2C; red arrows**).

209 Since Snx14 is implicated in LD biogenesis, we also examined LD  
210 morphology in WT and *SNX14*<sup>KO</sup> cells exposed to palmitate. Whereas WT cells  
211 generated small LDs in response to palmitate, *SNX14*<sup>KO</sup> cells exhibited significantly  
212 fewer LDs that stained poorly with the LD dye monodansylpentane (MDH),  
213 suggesting defective palmitate processing and LD incorporation (**Fig S2A, B**).  
214 Collectively, these observations suggest that *SNX14*<sup>KO</sup> cells manifest altered ER  
215 architecture and LD homeostasis following prolonged exposure to palmitate.

216

217 Changes in ER lipid homeostasis can induce the unfolded protein response  
218 (UPR) as well as caspase-dependent apoptotic cell death [13]. To understand  
219 whether such responses were associated with palmitate-induced cell death in Snx14  
220 deficient cells, we monitored them in *SNX14*<sup>KO</sup> cells. First, we examined the levels

221 of spliced Xbp1 (s-Xbp1) following palmitate exposure. As expected, palmitate  
222 elevated s-Xbp1 levels compared to no treatment in both WT and *SNX14*<sup>KO</sup> cells, but  
223 there was not a significant difference between the two cell lines (**Fig S2C**). In line  
224 with this, addition of the IRE1 inhibitor 4μ8c or PERK inhibitor GSK2606414, both  
225 which can suppress branches of UPR signaling, did not rescue palmitate-induced  
226 cell death in *SNX14*<sup>KO</sup> cells, suggesting altered or hyper-active UPR signaling was  
227 not causative of *SNX14*<sup>KO</sup> cell death following palmitate exposure (**Fig S2D**). To  
228 dissect whether SFAs induced an apoptotic response in *SNX14*<sup>KO</sup> cells, we also  
229 treated cells with the caspase-6/8 inhibitor SCP0094. This did not rescue palmitate-  
230 induced cell death, indicating *SNX14*<sup>KO</sup> cells were not manifesting hyper-active  
231 caspase-6/8-dependent apoptosis (**Fig S2D**).

232

### 233 **APEX-based proteomics reveals Snx14 is in proximity to proteins involved in** 234 **SFA metabolism**

235

236 Given that Snx14 was required for maintaining ER morphology and LD  
237 biogenesis following palmitate exposure, we next investigated what proteins Snx14  
238 interacted with that may promote lipid homeostasis. Previously we utilized a  
239 proximity-based technology based on the ascorbate peroxidase APEX2 to examine  
240 the localization of APEX2-tagged Snx14 at ER-LD contact sites using TEM [23].  
241 APEX2-tagging also enables the local interactome of a protein-of-interest to be  
242 interrogated. The addition of biotin-phenol and hydrogen peroxide to APEX2-  
243 expressing cells induces the local biotinylation of proteins within ~20nm of the  
244 APEX2 tag. These biotinylated proteins can be subsequently affinity purified via  
245 streptavidin beads and identified via mass-spectrometry (MS) [39] (**Fig 3A**). As ER-  
246 LD contacts are lipogenic ER sub-domains with known roles in FA processing, we  
247 hypothesized that Snx14's enrichment at ER-LD junctions represented an  
248 opportunity to use APEX2 technology to reveal proteins that contribute to ER lipid  
249 metabolism in conjunction with Snx14.

250 We generated *U2OS* cells stably expressing Snx14-EGFP-APEX2 and  
251 *HEK293* cells transiently expressing Snx14-EGFP-APEX2 and exposed them to  
252 oleate to induce Snx14 recruitment to ER-LD contacts. We then treated cells with  
253 biotin-phenol for 30 minutes and hydrogen peroxide for 1 minute. As expected, co-  
254 immunofluorescence staining of *U2OS* cells for Streptavidin-Alexa647 and EGFP  
255 revealed their colocalization, suggesting proteins in close proximity to Snx14-EGFP-  
256 APEX2 were biotinylated (**Fig 3B**). Biotinylated proteins from both *U2OS* and  
257 *HEK293* cells were then affinity purified with streptavidin beads. Gel electrophoresis  
258 followed by Coomassie staining and anti-streptavidin/HRP Western blotting revealed  
259 many biotinylated proteins in Snx14-EGFP-APEX2-expressing cell lysates, but not in  
260 controls lacking APEX2 (**Fig 3C**). The bead enriched biotinylated proteins from both  
261 Snx14-EGFP-APEX2 and the control lacking APEX2 were then identified by tandem  
262 MS/MS proteomic analysis.

263

264 Previous proteomics studies have isolated LDs and characterized LD-  
associated proteins [40-44], and several of these were also detected in our APEX2-

265 based approach (**Fig 3D**). However, to confirm that these peptide hits were specific  
266 to the Snx14-EGFP-APEX2 interactome, we also conducted proteomics on  
267 biotinylated proteins from cells expressing a soluble EGFP-APEX2 (cyto-APEX) as  
268 well as cells expressing APEX2-tagged Sec61 $\beta$ , a general ER marker (ER-APEX).  
269 High abundance peptides in the Snx14-EGFP-APEX2 proteomics that were  
270 correspondingly low in the cyto-APEX and ER-APEX were thus considered high  
271 confidence hits (**Fig 3D, Supplementary Table 1**). Notably, this list included well-  
272 characterized LD surface proteins Perilipin 3 (PLIN3), Perilipin 2, and PNPLA2. In  
273 fact, PLIN3 was one of the most enriched proteins from both cell line samples (>65-  
274 fold) (SFig 3A), consistent with it being a highly abundant LD protein that coats newly  
275 synthesized LDs. Proteins recently highlighted as localizing to ER-LD contact sites  
276 were also identified including VPS13C and VPS13A [45]. We also detected several  
277 Rab proteins such as Rab7a, Rab10, and Rab11b, which had previously been  
278 detected on LDs using a LD-targeted APEX approach [44]. Additionally, we detected  
279 enzymes involved in ER-associated lipid synthesis, including lyso-phospholipid  
280 acyltransferases LPCAT1, LPCAT3, and LPGAT, as well as enzymes driving sterol  
281 metabolism like the sterol O-acyltransferase SOAT1, the squalene synthase FDFT1,  
282 and the squalene epoxidase SQLE. Lastly, we noted several enzymes involved in FA  
283 metabolism and desaturation including ACSL4, ELOVL1, ELOVL5, FASN, SCD1,  
284 FADS1, and FADS2.

285 To identify Snx14 functional interactors that may play a role in FA metabolism  
286 that was defective in *SNX14*<sup>KO</sup> cells, we implemented a multi-stage analysis  
287 approach (**Fig 3E**). First, we selected proteins that were greater than 2.0-fold  
288 enriched in Snx14-EGFP-APEX2 samples over negative controls lacking APEX2  
289 (**Fig S3A, Circle 1 of Fig 3E**). Next, we focused on proteins annotated to localize to  
290 the ER network but also specific to the Snx14 interactome, since the ER was the  
291 primary organelle that manifested morphological alterations in *SNX14*<sup>KO</sup> cells  
292 following palmitate exposure. We did this by eliminating proteins detected at similar  
293 levels in both the ER-APEX and Snx14-EGFP-APEX2 proteomics (**Fig S3A, B;**  
294 **Circle 2 of Fig 3E**). We then applied gene ontology enrichment analysis on the  
295 annotated ER-associated proteins specific to Snx14 (Circle 3 of Fig 3E, Fig S3C),  
296 revealing that ~250 of these proteins are associated with cellular metabolism, and  
297 ~100 with lipid metabolism (**Fig S3D**).

298 With this smaller candidate list, we compared them to a recently published  
299 genome-wide CRISPR/Cas9 screen identifying proteins whose loss sensitized cells  
300 to palmitate-induced lipotoxicity [46]. Remarkably, this unbiased screening identified  
301 Snx14 in the top 6% of proteins that were protective against palmitate (KO gene  
302 score: -2.28). This study also identified 310 proteins detected in our Snx14  
303 interactome that exhibited a negative score greater than -1.8 for palmitate sensitivity  
304 [46] (**Supplementary Table 2; orange dots of Fig S3A; Circle 4 of Fig S3E**).  
305 These palmitate-sensitive proteins included FADS1, FADS2, SCD1, CEPT1 and  
306 HSD17B12 (**Fig S3F**).

307 As a final stage of analysis, we compared our list to our recently published  
308 interactome of Snx14 *Drosophila melanogaster* ortholog Snz, which also functions in

309 lipid homeostasis in fruit fly adipocytes [26]. Snz proteomics identified the enzyme  
310 DESAT1, the major fly  $\Delta$ -9 FA desaturase, as a key Snz functional interactor that  
311 was required for Snz-driven TG synthesis in *Drosophila* [26]. DESAT1 is the ortholog  
312 of human  $\Delta$ -9 FA desaturase SCD1, which catalyzes the conversion of SFAs to  
313 MUFAs prior to their incorporation into glycerophospholipids or neutral lipids [47].  
314 Indeed, several lines of evidence converged on SCD1 and its desaturation activity as  
315 being functionally linked to Snx14: 1) both proteins are ER-associated integral  
316 membrane proteins, and SCD1 was highly enriched in Snx14-EGFP-APEX2  
317 proteomics in both *U2OS* and HEK293 cell lines (**Fig 3D, Fig S3A**); 2) SCD1 genetic  
318 or pharmacological perturbation hyper-sensitizes cells to palmitate-induced cell  
319 death, similar to Snx14 loss [13, 48, 49] (**Fig 3F**); 3) in genome-wide screening both  
320 Snx14 and SCD1 scored similarly in impact to palmitate sensitivity (SCD1: -2.42,  
321 Snx14: -2.28) [46]. Note that here, we are operationally defining a potential functional  
322 interaction between SCD1 and Snx14 based on their phenotypical similarities; this is  
323 distinct from any potential physical interaction. Based on this analysis, we chose to  
324 investigate the functional interplay between Snx14 and SCD1-associated FA  
325 desaturation in ER lipid homeostasis.

326

### 327 **SNX14<sup>KO</sup> cell FA elevations are similar to cells with reduced SCD1 activity**

328 To begin dissecting the functional interplay between Snx14 and FA  
329 metabolism, we conducted whole-cell lipidomic FA profiling. We pulsed WT and  
330 *SNX14<sup>KO</sup>* cells for 2 hrs with 500 $\mu$ M palmitate, extracted polar lipids, and conducted  
331 gas chromatography (GC)-MS analysis to profile polar lipid fatty acyl chain length  
332 and saturation. Indeed, *SNX14<sup>KO</sup>* cells exhibited a significant increase in total polar  
333 lipid-derived FAs (**Fig S4A**), as well as a significant increase in the abundance of 16-  
334 carbon length saturated fatty acyl chains (FA|16:0) in polar lipids relative to WT cells  
335 (**Fig 4A**). To determine whether this increase mimics alterations in polar lipids when  
336 SCD1 function is perturbed, we also treated WT cells with SCD1 inhibitor (SCD1i).  
337 Indeed, WT cells exposed to SCD1i exhibited similar increases in 16:0 saturated  
338 fatty acyl chains in their polar lipid fraction, mirroring elevations observed in  
339 *SNX14<sup>KO</sup>* cells (**Fig 4A**). Furthermore, SCD1i-treated *SNX14<sup>KO</sup>* cells exhibited no  
340 additional 16:0 acyl chain increases in the polar lipid profile, implying SCD1i  
341 treatment and Snx14 loss may perturb the same pathway.

### 342 **TG, PC, and lysolipids lipids exhibit significant elevations in saturated acyl** 343 **chains in *SNX14<sup>KO</sup>* cells**

344 To dissect how specific lipid classes are altered by Snx14 loss, we conducted  
345 global lipidomics via quantitative liquid-chromatography (LC)-MS analysis. WT and  
346 *SNX14<sup>KO</sup>* cells were either left untreated or exposed to 2 hrs of palmitate, harvested,  
347 and analyzed. For comparative analysis, we again treated some cells with SCD1i.  
348 Importantly, this LC-MS analysis revealed fatty acyl properties such as chain length  
349 and saturation types of major lipid classes, including triglyceride (TG),



350 diacylglyceride (DAG), phosphatidylethanolamine (PE), phosphatidylcholine  
351 (PC), phosphatidic acid (PA), phosphatidylserine (PS), and lysophospholipids.  
352 Analysis revealed a significant (~40%) increase in the levels of DAG, LPE and PC in  
353 *SNX14*<sup>KO</sup> cells relative to WT cells following palmitate treatment (**Fig 4B**). However,  
354 relative abundances of most lipid classes between these two samples with or without  
355 palmitate treatment were not drastically altered.

356 Next, we examined the change in acyl chain saturation within each lipid class.  
357 In general, there was a greater proportion of saturated fatty acyl chains within  
358 several lipid classes. The most significant change in saturated fatty acyl chains in  
359 palmitate-treated *SNX14*<sup>KO</sup> cells relative to WT was in TG and lyso-PC (LPC).  
360 Examining ~60 different TG species revealed the most significant increase in TG  
361 species containing two or more saturated acyl chains. These TG species contained  
362 either 0 or 1 unsaturation among all three acyl chains (denoted as an N score of 0 or  
363 1) (**Fig 4C**). For example, TG|48:1(NL-16:1), which contains one mono-unsaturated  
364 (16:1) acyl chain and two fully saturated acyl chains, was significantly elevated in  
365 *SNX14*<sup>KO</sup> cells following palmitate treatment (**Fig 4C, species 11**). Notably, TG 50:0  
366 (NL-16:0) and 50:0 (NL-18:0), both of which contained three saturated acyl chains,  
367 were also elevated in *SNX14*<sup>KO</sup> cells compared to WT following palmitate addition  
368 and SCD1 inhibition, suggesting *SNX14*<sup>KO</sup> cells incorporated SFAs into TG more  
369 than WT cells (**Fig 4C, species 1 and 2**). For more global analysis, we pooled the  
370 abundances of all TG species comprising only 0 or 1 total fatty acyl unsaturation.  
371 Indeed, TG pooling revealed that TG containing 0 or 1 unsaturation was significantly  
372 increased in palmitate treated *SNX14*<sup>KO</sup> cells, and closely mirrored levels of WT cells  
373 treated with SCD1i (**Fig 4D**). Collectively, this suggests that the TG lipid profile of  
374 palmitate-treated *SNX14*<sup>KO</sup> cells exhibits increased acyl chain saturation, and is  
375 similar to cells with decreased SCD1 function.

376 Among polar lipid species, the abundance of LPC species containing the  
377 saturated fatty acyl chain 18:0 was significantly increased in palmitate-treated  
378 *SNX14*<sup>KO</sup> cells relative to WT (**Fig 4E**). In fact, levels of 18:0-containing LPC in  
379 *SNX14*<sup>KO</sup> cells treated with palmitate closely mirrored WT cells treated with palmitate  
380 and SCD1i, again indicating that *SNX14*<sup>KO</sup> cells closely resembled cells with  
381 inhibited SCD1 function by lipid profiling (**Fig 4E**). In line with this, there was a  
382 decrease in LPC species containing 18:1 or 18:2 acyl chains following palmitate  
383 treatment. LPE species containing 18:0 fatty acyl chains were also significantly  
384 increased in *SNX14*<sup>KO</sup> cells even without palmitate treatment (**Fig S4B**). Profiling of  
385 PC, one of the most abundant glycerophospholipids, also revealed an increase in PC  
386 species with 18:0 fatty acyl chain in *SNX14*<sup>KO</sup> cells, and that was more pronounced  
387 with palmitate treatment followed by SCD1 inhibition (**Fig S4D**). PS lipid profiles  
388 were similarly altered in *SNX14*<sup>KO</sup>, with increases in PS species containing 18:0  
389 saturated fatty acyl groups, and a corresponding decrease in PS with 18:1 or 18:2  
390 acyl chains (**Fig S4C**).

391 Collectively, LC-MS lipidomics suggests: 1) *SNX14*<sup>KO</sup> cells exhibit elevated  
392 TG species containing two or more saturated acyl chains, 2) *SNX14*<sup>KO</sup> cells have  
393 increased levels of LPC and LPE lysolipids containing saturated fatty acyl chains, 3)  
394 *SNX14*<sup>KO</sup> cells exhibit more PC and PS with an 18:0 saturated acyl chain and less  
395 with 18:1 or 18:2, and 4) for TG and LPC, the lipid profiles of *SNX14*<sup>KO</sup> cells exposed  
396 to palmitate closely mirror cells with inhibited SCD1 function.

### 397 **SCD1 activity can rescue *SNX14*<sup>KO</sup> palmitate-induced lipotoxicity**

398 Given the increased lipid saturation profiles of *SNX14*<sup>KO</sup> cells, we next  
399 examined SCD1 protein levels in the context of *Snx14* loss. SCD1 protein  
400 abundance was similar in WT and *SNX14*<sup>KO</sup> cells under ambient conditions, but  
401 became elevated in both cell lines when exposed to 500 $\mu$ M palmitate. Notably,  
402 SCD1 protein levels were significantly more elevated in *SNX14*<sup>KO</sup> cells exposed to  
403 palmitate. *Snx14*-Flag over-expressing cells returned SCD1 protein levels to WT  
404 levels, implying that *SNX14*<sup>KO</sup> cells may further elevate SCD1 protein expression to  
405 compensate for *Snx14* loss (**Fig 5A,B**).

406 Since *SNX14*<sup>KO</sup> cells exhibited slightly elevated SCD1 levels, we queried  
407 whether ectopic SCD1 over-expression could reduce *SNX14*<sup>KO</sup> associated palmitate  
408 hyper-sensitivity. Strikingly, SCD1 over-expression rescued *SNX14*<sup>KO</sup> cell viability,  
409 and *SNX14*<sup>KO</sup> cells now responded similarly to WT cells exposed to dose-dependent  
410 palmitate treatment (**Fig 5C**). *SNX14*<sup>KO</sup> cells were also rescued by exposure to  
411 mixtures of palmitate and oleate, the MUFA and product of SCD1 enzymatic activity  
412 (**Fig S5A**). Since *SNX14*<sup>KO</sup> cells also displayed defective LD morphology with  
413 palmitate, we tested whether SCD1 over-expression could restore LD levels. Indeed  
414 *SNX14*<sup>KO</sup> cells over-expressing SCD1 manifested more LDs following palmitate  
415 exposure (Fig S2A,B). Since LDs are lipid reservoirs, we also determined whether  
416 this SCD1-mediated rescue required the incorporation of FAs into TG for LD storage.  
417 We exposed *SNX14*<sup>KO</sup> cells to DGAT1/2 inhibitors (DGATi) in the presence of  
418 palmitate, and monitored cell viability. Surprisingly, SCD1 over-expression rescued  
419 *SNX14*<sup>KO</sup> cells even with DGATi, suggesting this SCD1-mediated rescue functions  
420 upstream of TG synthesis (**Fig S5B**).

421 Since *SNX14*<sup>KO</sup> and SCD1i-exposed cells displayed some lipidomics  
422 similarities, and SCD1 over-expression mitigated palmitate-induced *SNX14*<sup>KO</sup> cell  
423 death, we hypothesized that *SNX14*<sup>KO</sup> cells had defects processing SFAs. To test  
424 this, we exposed WT and *SNX14*<sup>KO</sup> cells to 500 $\mu$ M palmitate for 0, 2, 4, 8, and 16 hr,  
425 extracted whole cell lipids and conducted thin layer chromatography (TLC) to monitor  
426 changes in free FAs (FFAs) and neutral lipids. As expected, both WT and *SNX14*<sup>KO</sup>  
427 cells exhibited elevated FFA levels following 2 and 4 hrs palmitate exposure, but  
428 *SNX14*<sup>KO</sup> exhibited significantly elevated FFAs compared to WT (**Fig 5D, S5C**).  
429 SCD1 over-expression reversed this FFA elevation at 4 hrs in *SNX14*<sup>KO</sup> cells,  
430 implying the elevated FFA pool was composed of SFAs that could be processed by

431 SCD1 (**Fig 5E, S5D**). As a key control, we monitored uptake of radio-labeled  $^{14}\text{C}$ -  
432 palmitate in WT and  $\text{SNX14}^{\text{KO}}$  cells, to test whether elevated FFA accumulation in  
433  $\text{SNX14}^{\text{KO}}$  cells was due to increased FA uptake. We confirmed that FA uptake was  
434 not altered by Snx14 loss (**Fig S5E**). This indicates that  $\text{SNX14}^{\text{KO}}$  cells accumulate  
435 FFAs following palmitate uptake, consistent with a defect in palmitate processing,  
436 and these effects can be reversed by SCD1 over-expression.

437

438 To understand whether the ER fragmentation observed in  $\text{SNX14}^{\text{KO}}$  cells is  
439 associated with defects in palmitate processing, we examined ER morphology in  
440 SCD1 over-expressed  $\text{SNX14}^{\text{KO}}$  cells following palmitate exposure. Remarkably,  
441 ectopic expression of SCD1 in palmitate-treated  $\text{SNX14}^{\text{KO}}$  cells rescued ER  
442 morphology (**Fig 5F, G**). Collectively, this suggests that SCD1 over-expression can  
443 rescue  $\text{SNX14}^{\text{KO}}$  elevated lipid saturation, LD morphology, and ER fragmentation.

444

### 445 **Snx14 functionally interacts with SCD1 in the ER network**

446

447 Since Snx14 and SCD1 appeared to have phenotypical similarities, and SCD1  
448 over-expression could rescue aspects of Snx14 loss, we next examined whether the  
449 two proteins could co-immunoprecipitate (co-IP), which would suggest their close  
450 proximity to each other within the ER network. We generated *U2OS* cell lines stably  
451 expressing either 3xFlag-tagged Snx14 or GFP, conducted anti-Flag immuno-  
452 precipitation, and Western blotted the IP lysates for endogenous SCD1. SCD1 was  
453 detected in the Snx14-Flag sample but not GFP-Flag (**Fig 6A**). Intriguingly, Snx14-  
454 Flag co-IPed endogenous SCD1 both with and without palmitate addition (**Fig 6A**).  
455 To determine whether this interaction was specific, we Western blotted for PLIN3  
456 which was highly enriched in the Snx14 APEX2-proteomics (**Fig 3D, Fig S3A**).  
457 Notably, PLIN3 was not detected in the Snx14 co-IP lysate (**Fig S6A**).

458 Next we dissected what regions of Snx14 were sufficient to co-IP SCD1. We  
459 used cell lines stably expressing the Flag-tagged N-terminal half of Snx14 encoding  
460 the transmembrane (TM), PXA, and RGS domains ( $\text{Snx14}^{\text{N}}$ ), or a C-terminal half  
461 with the PX and C-Nexin domains ( $\text{Snx14}^{\text{PXCN}}$ ) (**Fig 6B**). Co-IP experiments revealed  
462 that  $\text{Snx14}^{\text{N}}$ , but not  $\text{Snx14}^{\text{PXCN}}$ , was sufficient to pull down SCD1 (**Fig 6C**). To test  
463 whether this Snx14:SCD1 co-IP required SCD1 desaturase activity, we conducted  
464 the co-IP with full length Snx14 ( $\text{Snx14}^{\text{FL}}$ ) in the presence of SCD1i [50]. Inhibited  
465 SCD1 still co-IPed with  $\text{Snx14}^{\text{FL}}$ , indicating this interaction did not require SCD1  
466 enzymatic activity (**Fig 6C**).

467 Given Snx14 and SCD1 could co-IP *in vitro*, we tested whether this interaction  
468 occurred in intact cells. We exploited the previous observation that Snx14 enriches  
469 at ER-LD contacts following oleate addition [23]. Given this, we queried whether  
470 Snx14 over-expression was sufficient to drive the accumulation of SCD1 at ER-LD  
471 interfaces, since it normally resides throughout the ER network. As expected,  
472 immunofluorescence (IF) labeling of endogenous SCD1 in non-oleate treated cells  
473 transfected with Snx14-EGFP revealed SCD1 co-localization with Snx14 throughout  
474 the ER network (**Fig 6D, S6B**). Following oleate addition, Snx14-EGFP accumulated

475 at ER-LD contacts, and co-localized with SCD1 foci which also enriched at these  
476 sites (**Fig 6D, red arrows, S6B**). In contrast, expression of Snx14<sup>PXCN</sup>-EGFP, which  
477 accumulates around LDs [23], failed to colocalize with SCD1 foci, consistent with  
478 Snx14<sup>PXCN</sup> being insufficient to co-IP SCD1 (**Fig 6D, S6B**). Snx14<sup>N</sup>-EGFP localized  
479 throughout the ER network following oleate, since it lacks the previously identified  
480 LD-targeting region in the CN domain [23], and this co-localized with SCD1  
481 throughout the ER network but did not promote SCD1 foci at ER-LD contacts,  
482 consistent with co-IP results (**Fig 6D, S6B**). Collectively, this suggests that Snx14  
483 co-IPs SCD1 from cell lysates, and can interact with SCD1 in cells. It should be  
484 noted that the ER-LD SCD1 accumulations we observe require Snx14 over-  
485 expression; we do not detect SCD1 enrichment at ER-LD contacts under more  
486 ambient conditions.

### 487 **Snx14 loss does not impact SCD1 enzymatic activity, but Snx14 requires its** 488 **FA-binding PXA domain for function**

489 To further dissect how Snx14 and SCD1 contribute to SFA metabolism at the  
490 ER, we examined whether Snx14 regulates SCD1 enzymatic activity. We directly  
491 assayed SCD1 activity *in vitro* via a well-established radio-label based desaturase  
492 assay [10]. We pulsed microsomal fractions isolated from WT or *SNX14*<sup>KO</sup> cells with  
493 (9,10-<sup>3</sup>H)-stearoyl-CoA, a SCD1 substrate. SCD1 activity releases free <sup>3</sup>H when  
494 stearoyl-CoA is mono-unsaturated, which can be directly detected by scintillation  
495 counting. As a positive control, we treated samples with SCD1i, and detected a  
496 significant decrease in free <sup>3</sup>H indicating reduced SCD1 activity (**Fig 7A**). However,  
497 there was no significant change in relative SCD1 activity in *SNX14*<sup>KO</sup> cells,  
498 suggesting Snx14 is not required for SCD1 activity.

499 Since Snx14 yeast ortholog Mdm1 had previously been shown to directly bind  
500 to FAs *in vitro* via its PXA domain [25], we next interrogated whether Snx14 requires  
501 its PXA domain for function. We generated cell lines stably expressing Snx14 lacking  
502 its PXA domain (Snx14<sup>FLΔPXA</sup>) (**Fig 7B**), and queried whether this construct could co-  
503 IP with SCD1 as well as process the accumulated FFAs in *SNX14*<sup>KO</sup> cells following  
504 palmitate exposure. Intriguingly, Snx14<sup>FLΔPXA</sup> could co-IP with SCD1 (**Fig 7C**).  
505 However, in contrast to *SNX14*<sup>KO</sup> cells expressing full length Snx14 (Snx14<sup>FL</sup>) which  
506 could had normal FFA levels, *SNX14*<sup>KO</sup> expressing Snx14<sup>FLΔPXA</sup> cells exhibited  
507 elevated FFA levels similar to *SNX14*<sup>KO</sup> cells. This indicates that the Snx14 PXA  
508 domain was required for FFA processing (**Fig 7D**). Importantly, here also we  
509 confirmed that FA uptake was not altered by expressing Snx14<sup>FL</sup> or Snx14<sup>FLΔPXA</sup> in  
510 *SNX14*<sup>KO</sup> cells, indicating that the elevated FFA accumulation in *SNX14*<sup>KO</sup> cells  
511 expressing Snx14<sup>FLΔPXA</sup> was not due to increased FA uptake (**Fig S5E**).

512 Next, we assayed whether the PXA domain was necessary to rescue  
513 *SNX14*<sup>KO</sup> cell viability following palmitate exposure. Indeed, Snx14<sup>FLΔPXA</sup> failed to  
514 rescue *SNX14*<sup>KO</sup> cell viability, indicating the PXA was required for Snx14-mediated

515 protection from palmitate (**Fig 7E**). However, *SNX14*<sup>KO</sup> cells expressing Snx14<sup>N</sup> were  
516 protected from palmitate, suggesting this minimal Snx14 fragment which contains an  
517 ER-anchored PXA domain is sufficient for palmitate protection. However, a Snx14  
518 construct which lacked the N-terminal TM domain but encoded all other domains  
519 (Snx14<sup>FLΔTM</sup>) could not rescue the *SNX14*<sup>KO</sup> cell viability, indicating that TM-  
520 mediated ER association is also required for Snx14 function (**Fig 7B, E**). Collectively,  
521 this suggests that Snx14 loss does not impact SCD1 enzymatic activity *in vitro*, but  
522 implies that the ER-associated Snx14 PXA domain may interact with FAs at or near  
523 the ER network in a manner that promotes SCD1-mediated FA processing.

## 524 **Discussion:**

525

526 FAs are essential cellular components that act as energy substrates,  
527 membrane components, and key signaling molecules. These functions are  
528 dependent on the chemical features of FAs such as their chain length and saturation  
529 degree, which influence membrane fluidity and impact organelle structure and  
530 function [10, 46]. Lipid homeostasis depends on FA processing and channeling to  
531 specific organelle destinations. When cells experience elevated intracellular FA  
532 levels, they respond by increasing FA processing and storage. Excess FAs are  
533 incorporated into neutral lipids and stored in LDs, which protect cells from lipotoxicity  
534 [51]. Much of the machinery to achieve this resides at the ER, and proper ER-LD  
535 crosstalk by proteins such as seipin and the FATP1-DGAT2 complex is essential to  
536 maintain lipid homeostasis [17-19]. Our earlier work revealed a role for Snx14 in ER-  
537 LD crosstalk, the loss of which contributes to the cerebellar ataxia disease SCAR20  
538 for unknown reasons [23]. Here, we report the proteomic composition of Snx14-  
539 associated ER-LD contacts, and provide mechanistic insights into the function of  
540 Snx14 in FA metabolism. We find that Snx14 loss impacts the ability of cells to  
541 maintain proper lipid saturation profiles. In line with this, following SFA exposure  
542 *SNX14*<sup>KO</sup> cells display defects in ER morphology, FFA accumulation and elevated  
543 SFA incorporation into membrane glycerophospholipids, lyso-phospholipids, and TG,  
544 which ultimately impacts cell homeostasis.

545

546 Utilizing APEX2-based proteomics analysis, we reveal the protein composition  
547 of Snx14-positive ER-LD contacts formed during oleate treatment. Notably, these  
548 contacts contain proteins associated with the LD surface such as PLIN2, PLIN3, and  
549 PNPLAP2. We also detect numerous proteins involved in FA processing (ACSL4,  
550 SCD1) and lipid/sterol biosynthesis (LPCAT1, LPCAT3, SOAT1), indicating that ER-  
551 LD contacts act as lipogenic ER sub-domains for several lipid species, as well as  
552 hotspots for FA processing. These proteomics reveal many proteins previously  
553 identified through a similar APEX-based proteomics study which targeted APEX to  
554 the LD surface, providing consistency in the method, as well as underscoring the  
555 tight functional association between LDs and the ER network [44]. Among these  
556 proteins, we focused on investigating the functional interplay between Snx14 and  
557 SCD1-associated SFA metabolism, which provided important insights in

558 understanding the hypersensitivity of *SNX14*<sup>KO</sup> cells to palmitate exposure. Although  
559 we cannot conclude that Snx14 and SCD1 directly interact, their phenotypical  
560 similarities and functional interplay provide important insights that may help in the  
561 therapeutic treatment of SCAR20.

562

563 Through lipidomic analysis and biochemistry, we show that Snx14 loss  
564 phenotypically mimics aspects of the enzymatic inhibition of  $\Delta$ -9-FA desaturase  
565 SCD1, which catalyzes the oxidization of SFAs to MUFAs (**Fig 8**) [47]. In line with  
566 this, SCD1 over-expression can rescue palmitate sensitivity in Snx14-deficient cells.  
567 We also find that SCD1 and Snx14 can co-IP from cell lysates, and that Snx14 over-  
568 expression can promote SCD1 enrichment at ER-LD contacts under distinct  
569 metabolic conditions. The data presented are consistent with a model where Snx14  
570 may promote FA processing to maintain ER homeostasis. One possibility is that  
571 Snx14 acts as an organizational scaffold for enzymes including SCD1 within the ER  
572 network, enabling FAs to be processed. In agreement with this, Snx14 requires its  
573 FA-binding PXA domain to function, implying that Snx14 could bind FA substrates  
574 and present them to SCD1 during periods of elevated FA influx. However, it should  
575 be noted that *SNX14*<sup>KO</sup> cells do not display altered SCD1 enzymatic activity,  
576 indicating that Snx14 is not a direct enzymatic regulator of SCD1 *per se*, nor required  
577 for its activity. We also cannot rule out the possibility that Snx14 may interact or  
578 present FAs to other enzymes in the ER network, which could explain other  
579 alterations in the lipidomics profile of *SNX14*<sup>KO</sup> cells.

580

581 Snx14 is highly conserved in evolution, and related studies of Snx14 orthologs  
582 provide mechanistic insights into Snx14's role in lipid homeostasis. *Drosophila*  
583 ortholog Snz functionally interacts with SCD1 ortholog DESAT1 in the adipocyte cell  
584 periphery, a sub-cellular region rich in FA processing [26]. Similarly, yeast ortholog  
585 Mdm1 functions in FA activation and LD biogenesis near the yeast vacuole [25, 52].  
586 As such, Mdm1-deficient yeast are sensitive to high dosages of exogenous FAs.  
587 Studies of both Snz and Mdm1 also reveal these proteins localize to specific sub-  
588 regions of the ER network, and thereby help to demarcate ER sub-domains through  
589 their inter-organelle tethering capabilities. Thus, an emerging possibility is that Snx14  
590 family proteins act as organizational scaffolds within the ER network, and recruit  
591 enzymes into ER sub-domains to more efficiently process lipids.

592

593 Collectively, our observations provide a framework for understanding how  
594 Snx14 loss contributes to the cerebellar ataxia disease SCAR20. A growing number  
595 of neurological diseases are attributed to loss of proteins that function in ER-  
596 localized lipid metabolism or in the maintenance of ER architecture [27-29]. Our data  
597 are consistent with a model where Snx14 loss perturbs the ability of cells to maintain  
598 FA metabolism and membrane lipid composition, ultimately elevating SFA levels and  
599 saturated fatty acyl chain incorporation in membrane lipids. Such alterations will  
600 ultimately effect membrane fluidity, organelle function, and contribute to cellular  
601 lipotoxicity and the progressive death of cells like neurons, a pervasive symptom of

602 SCAR20 disease [20, 22]. Additionally, although we focused our analysis here on the  
603 interplay between Snx14 and SFA metabolism, the APEX2-based proteomics and  
604 lipidomics analysis will provide insights into understanding proteins and lipogenic  
605 reactions at ER-LD contacts.

606

## 607 **Materials and Methods:**

608

### 609 **Cell culture**

610 U2OS and HEK293 cells were maintained and expanded in DMEM (Corning, 10-  
611 013-CV) media containing 10% Cosmic Calf Serum (Hyclone, SH30087.04) and 1%  
612 Penicillin Streptomycin Solution (100X, Corning, 30-002-CI). All cells were cultured at  
613 37°C and 5% CO<sub>2</sub>. The cells were passaged with Trypsin-EDTA (Corning, 25-053-  
614 CI) when they reach 80-90% confluency. For the cell viability assay, cells were  
615 treated with different concentration of FFA (250, 500, 750, 1000 μM) for 48 hours.  
616 For all other FFA treatment, the cells were incubated with 500μM of either oleate or  
617 palmitate for the indicated period of time. In all the experiments the FFAs were  
618 conjugated with fatty acid free BSA (Sigma, A3803) in the ratio of 6:1.

619

### 620 **Chemicals and reagents**

621 For cell treatments, the following reagents were used for indicated periods of time –  
622 (1) SCD inhibitor (Abcam, ab142089) – 4 μM in DMSO (2) Myriocin (Sigma, M1177)  
623 – 50 μM in DMSO (3) Tunicamycin (Sigma) – 5 μg/ml in DMSO for 6hr (4) Etomoxir  
624 (Cayman chemical, 11969) – 10 μM in DMSO (5) DGAT inhibitors include DGAT1  
625 inhibitor (A-922500, Cayman chemical ,10012708) – 10 μM in DMSO, and DGAT2  
626 inhibitor (PF-06424439, Sigma, PZ0233)– 10 μM in H<sub>2</sub>O (6) IRE1 inhibitor 4μ8c  
627 (Sigma, SML0949) – 64μM in DMSO (7) PERK inhibitor I, GSK2606414 (EMD  
628 Millipore, 516535) - 30 nM in DMSO (c) Caspase 6/8 inhibitor (Sigma, SCP0094) -  
629 40μM in DMSO.

630

### 631 **Generation of stable cell line using lentiviral transduction**

632

633 Stable cell line – U2OS cells stably expressing all C-terminally 3X Flag tagged  
634 SNX14<sup>FL</sup>, SNX14<sup>N</sup> and SNX14<sup>PXCN</sup> generated in the previous study (ref) has been  
635 used here. Both Snx14<sup>FLΔTM</sup> and Snx14<sup>FLΔPXA</sup>, with 3XFlag tag at the C-terminal,  
636 were generated following PCR amplification using Snx14<sup>FL</sup>-3XFlag (primers available  
637 on request) and cloning into the plvx lentiviral vector with puromycin (puro)  
638 resistance cassette. Similarly GFP-Flag plasmid was cloned into plvx-puro vector.  
639 The cloned plasmids and lentiviral packaging plasmids were transfected together  
640 into 293T cells to generate lentivirus which were transduced into U2OS cells.  
641 Puromycin was used to select and expand the transduced cells expressing the  
642 plasmid. The generated stable cell lines were stored in liquid nitrogen before their  
643 use in experiments.

644

645 Stable U2OS cells expressing Snx14-EGFP-APEX2 was used from [23]. Similar  
646 stable cell line generation method as described above was used to generate EGFP-  
647 APEX2-Sec61 $\beta$  which is also puromycin resistant. cDNA library was used for PCR  
648 amplification of Sec61 $\beta$ . *SNX14*<sup>KO</sup> U2OS cells used here was generated using  
649 CRISPR/Cas9 in [23].

650

### 651 **Cloning and transient transfection**

652 All C-terminally EGFP tagged Snx14 constructs i.e. *SNX14*<sup>FL</sup>, *SNX14*<sup>N</sup> and  
653 *SNX14*<sup>PXCN</sup> used were generated in [23]. Snx14-EGFP-APEX2 was cloned in pCMV  
654 vector for transient transfection. The primers used for cloning are available on  
655 request. HEK293 and U2OS cells were transiently transfected using PEI-Max  
656 Transfection reagent (Polysciences, 24765) and optimem (gibco, 31985-070) for 48  
657 hours prior to experiments.

658

### 659 **Cell viability assay**

660 The cell viability assay protocol was adapted from [30, 31]. Cells were seeded at  
661 ~40% confluency and maintained in cell culture media overnight in a 12 well plate.  
662 On the following day, the cells were treated with indicated concentration of FFA for 2  
663 days. Then the cells were washed with PBS, fixed with 4% PFA, stained with 0.1%  
664 crystal violet (Sigma) for 30 mins, excess stain was washed, and then the stain from  
665 the surviving cells were extracted with 10% acetic acid, whose optical density (OD)  
666 was measured at 600nm. The percentage of survival cells (cell viability) were  
667 quantified relative to the untreated cells whose OD measurement is set at 100%  
668 survival. The assay was performed thrice in triplicates.

669

### 670 **Electron Microscopy**

671 The U2OS cells were cultured under desired condition on MatTek dishes and  
672 processed in the UT Southwestern Electron Microscopy Core Facility. The cells were  
673 fixed with 2.5% (v/v) glutaraldehyde in 0.1M sodium cacodylate buffer, rinsed thrice  
674 in the buffer, and post-fixed in 1% osmium tetroxide and 0.8 % *K*<sub>3</sub>[Fe(CN)<sub>6</sub>] in 0.1 M  
675 sodium cacodylate buffer at room temperature for 1 hr. After rinsing the fixed cells  
676 with water, they were en bloc stained with 2% aqueous uranyl acetate overnight. On  
677 the following day, the stained cells were rinsed in buffer and dehydrated with  
678 increasing concentration of ethanol. Next they were infiltrated with Embed-812 resin  
679 and polymerized overnight in a 60°C oven. A diamond knife (Diatome) was used to  
680 section the blocks on a Leica Ultracut UCT (7) ultramicrotome (Leica Microsystems),  
681 which were collected onto copper grids, and post stained with 2% aqueous uranyl  
682 acetate and lead citrate. A Tecnai G<sup>2</sup> spirit transmission electron microscope (FEI)  
683 equipped with a LaB<sub>6</sub> source and a voltage of 120 kV was used to acquire the  
684 images.

685

### 686 **Immunofluorescent (IF) staining**



687 For IF staining the cells were fixed with 4% PFA in PBS for 15-30 mins at room  
688 temperature. Then the cells were washed with PBS and permeabilized with 0.2%  
689 NP40 in PBS at RT for 3 mins. The cells were incubated with IF buffer (PBS  
690 containing 3% BSA, 0.1% NP40 and 0.02% sodium azide) for 40 mins to block non-  
691 specific binding. Next the cells were stained with primary antibody in IF buffer for 1  
692 hr, washed with PBS thrice and stained with secondary antibody in IF buffer for 30  
693 mins, again washed thrice with PBS, and used for imaging.

694 The primary antibodies used in this study are mouse anti-Hsp90B1 (1:300; Sigma,  
695 AMAb91019), rabbit anti-EGFP (1:300; Abcam, ab290), mouse anti-EGFP (1:200,  
696 Abcam, ab184601), rabbit anti-SCD1 (1:100; Abcam, ab39969), streptavidin-alexa  
697 647 (ThermoFisher Scientific, S21374). The secondary antibodies are donkey anti-  
698 mouse AF488 (Thermo Fisher, A21202) and donkey anti-rabbit AF594 (Thermo  
699 Fisher, A21207) used at a dilution of 1: 1000. LDs were stained with MDH (1:1000;  
700 Abgent, SM1000a) for 15 mins.

701

### 702 **Confocal microscopy and image analysis**

703 A Zeiss LSM 780 Confocal Microscope was used to acquire the images of the cells  
704 with a 63X oil immersion objective. Approximately 4-5 Z-sections of each image were  
705 taken. ImageJ was used to analyse the images and represent them. The images  
706 were merged by max z-projection prior to analysis.

707

708 Analysis of ER morphology – We quantified the ER morphology from 3 sets of  
709 experiments, imaging approx. 6 cells in one field of view and six fields of view in  
710 each experiment. This gave us ~100 cells to quantify the ER morphology which is  
711 grouped into four classes – (A) regular and intact ER (B) ER with partial  
712 fragmentation where the nucleus is still intact (C) fully fragmented ER, with distinct  
713 bulges where the nuclear envelope also disappeared, (D) the ER stain is soluble.  
714 Examples of A,B,C,D is shown in Fig 2. For each set of experiment, percentage of  
715 cells of each class of ER morphology is quantified and plotted.

716

717 Quantification of LDs – Using ImageJ, the images with MDH stained LDs were  
718 grayscaled and inverted (Fig S2A). The cell boundary was traced by a freehand line  
719 tool. To analyse the average area covered by LDs per cell, the following steps in  
720 ImageJ were used – 1) LDs were processed by using ‘Subtract background’ in  
721 ‘Process’. Next in ‘Process’, we used ‘Filter’ to apply ‘Gaussian blur’. To get rid of the  
722 background, we then subtracted the blurred image from the original in ‘image  
723 calculator’ in ‘Process’. 2) We ‘threshold’-ed the modified image and then applied  
724 ‘analyse particles’. The LDs were clustered in these images and could not be  
725 distinguished from one another. So, we analysed the average area covered by LDs  
726 per cell, which provided an estimate of both size and number of LDs.

727

### 728 **RNA extraction and qRT-PCR**

729 To extract RNA, tissue culture cells were solubilized in TRIzol and collected from  
730 dishes, then treated with chloroform and centrifuged at 12000g for 15mins. To

731 precipitate RNA, the upper colorless aqueous layer was collected, and isopropanol  
732 was added. Next, the supernatant was discarded and the RNA precipitate was  
733 washed by ethanol, air-dried and resuspended in RNase-free water. This RNA was  
734 used to generate cDNA using Bio-Rad commercial kit (iScript cDNA synthesis kit  
735 1708891). The cDNA was used for qPCR reaction to analyse spliced xbp1 (s-xbp1)  
736 mRNA level which is an indicator of UPR activity that results from ER stress. Cells  
737 treated with tunicamycin (5µg/ml) for 6 hr was used as a control for UPR activity. The  
738 internal control used for the qPCR reaction was β-actin (actb). The primers used for  
739 qPCR were Kicq predesigned primers (Sigma-Aldrich).

740

#### 741 **Analysis of rate of FA uptake**

742 Cells were treated with a mix of 200µM non-radiolabeled palmitate (BSA conjugated  
743 at 6:1) and 0.15µCi [1-<sup>14</sup>C] palmitic acid (American Radiolabeled Chemicals, ARC  
744 0172A) conjugated with 10µM BSA for 15, 30, 60 mins. Following the treatment, the  
745 cells were solubilized with RIPA lysis buffer. The <sup>14</sup>C counts per min of each sample  
746 was calculated in a scintillation counter. The radioactive counts was normalized to  
747 protein concentration of the samples quantified by Bradford assay.

748

749 **Microsome isolation** – The cell pellets were dissolved in 1ml cell lysis buffer (20mM  
750 tricine and 250 mM sucrose, 1mM EDTA, pH 7.8) containing protease inhibitor  
751 cocktail (ThermoFisher, 78430). The resuspended cells were then dounce  
752 homogenized and centrifuged for 10 mins at 8000 g. The supernatant was collected  
753 and centrifuged for 1 hr at 100,000 g. The resultant microsomal pellet was  
754 resuspended in 0.1 M PK buffer (0.1 M K<sub>2</sub>HPO<sub>4</sub> buffer set at pH 7.2 with NaH<sub>2</sub>PO<sub>4</sub>  
755 solution).

756

757 **SCD1 enzyme activity** - The protocol was provided by Dr. James Ntambi's lab and  
758 was also adapted from [10]. In brief, we made a reaction mix consisting of 0.03 mM  
759 stearoyl-CoA (Sigma, S0802), 1 µCi/ml radiolabelled [9,10-<sup>3</sup>H] stearoyl-CoA  
760 (American Radiolabeled Chemicals, ART 0390), 2 mM NADH (Sigma, N8129) in 0.1  
761 M PK buffer (0.1 M K<sub>2</sub>HPO<sub>4</sub> buffer set at pH 7.2 with NaH<sub>2</sub>PO<sub>4</sub> solution). 1.5 mM of  
762 stearoyl-CoA stock was prepared in cold and fresh everytime in 10mM sodium  
763 acetate in 50% ethanol solution. The reaction assay consisted of 100 µg microsomes  
764 in 0.1 M PK buffer and 180 µl of premix. 4 µM SCDi was added as a control sample  
765 prior to the reaction. The reaction was done at 37°C for 30 mins, after which 200 µl  
766 of 6% perchloric acid was used to quench the reaction. Next 700 µl of 10% (w/v)  
767 charcoal dissolved in PBS was added to sediment the unused substrate. The sample  
768 was vigorously vortexed to mix and then centrifuged at 13000 rpm for 10 mins. The  
769 radioactive <sup>3</sup>H following the SCD1 enzyme activity released in the aqueous phase  
770 which was counted in a scintillation counter. The results were quantified as <sup>3</sup>H  
771 counts per min normalised to WT microsomes.

772

#### 773 **Neutral lipid analysis by thin layer chromatography (TLC)**

774 A protocol from [53] was used to extract lipids from cultured cells. Following  
775 treatment cells were washed twice with PBS, scraped and their pellet weights were  
776 detected. The pellets were treated with chloroform, methanol, 500 mM NaCl in 0.5%  
777 acetic acid such that the ratio of chloroform: methanol: water was 2:2:1.8. The  
778 suspended lysed cells were vortexed and centrifuged at 4000 rpm for 15 min at 4°C.  
779 The bottom chloroform layer consisting of lipids was collected, dried and then  
780 resuspended in chloroform to a volume proportional to cell pellet weight. These lipids  
781 in chloroform were separated using thin layer chromatography (TLC). The solvent  
782 used to separate neutral lipids and FFAs was hexane: diethyl ether: acetic acid  
783 (80:20:1) or cyclohexane: ethylacetate (1:2). To develop the lipid spots, the TLC  
784 plates were sprayed with 3% copper acetate dissolved in 8% phosphoric acid and  
785 heated in the oven at 135°C for ~1hr. The spraying and heating of the TLC plates  
786 was repeated until the lipids could be properly visualized. Once the bands  
787 developed, the TLC plates were scanned and then Fiji (ImageJ) was used to quantify  
788 the intensity of the bands. The relative change in intensity of each band was  
789 quantified with respect to untreated WT sample.

790

#### 791 **APEX2 dependent biotinylation**

792 This protocol was modified from [39]. In brief, U2OS and HEK293 cells expressing  
793 APEX2 tagged constructs and non-APEX2 construct (negative control) were  
794 incubated with 500 µM biotin-phenol (BP) (Adipogen, CDX-B0270-M100) for 30 mins  
795 and 1mM H<sub>2</sub>O<sub>2</sub> was added for 1 min to biotinylate proteins proximal (labeling radius  
796 of ~20nm) to the expression of APEX2 tagged construct. The biotinylation reaction  
797 was quenched after 1 min by washing the cells thrice with a quencher solution  
798 (10mM sodium ascorbate, 5mM Trolox and 10mM sodium azide solution in DPBS).

799 To visualize the biotinylated proteins, the cells were IF-stained with streptavidin-  
800 alexa 647 (ThermoFisher Scientific, S21374) during incubation with secondary  
801 antibody and then imaged using confocal microscopy.

802 To identify the biotinylated proteins, immunoprecipitation and mass spectrometry  
803 techniques were used. After the labelling reaction, the cells were scraped in  
804 quencher solution and lysed in RIPA lysis buffer consisting of protease inhibitor  
805 cocktail (ThermoFisher, 78430), 1mM PMSF and quenchers. The lysates were  
806 vortexed vigorously in cold for 30 mins and cleared by centrifuging at 10,000g for 10  
807 mins at 4°C. The cell lysate was then dialysed using Slide-A-Lyzer dialysis cassette  
808 (3500 MWCO, ThermoFisher Scientific) to remove unreacted free BP. The protein  
809 concentration was then measured using Pierce 660nm assay. 2 mg protein was  
810 incubated with 80ul streptavidin magnetic beads (Pierce, 88817) for 1 hour at room  
811 temperature on a rotator. The beads were pelleted using a magnetic rack. The  
812 pelleted beads were washed with a series of buffers - twice with RIPA lysis buffer,  
813 once with 1 M KCl, once with 0.1 M Na<sub>2</sub>CO<sub>3</sub>, once with 2 M urea solution in 10 mM  
814 Tris-HCl, pH 8.0, and twice with RIPA lysis buffer. To elute the biotinylated proteins ,  
815 the beads were boiled in 80ul of 2X Laemmli Sample Buffer (Bio-Rad, 161-0737)  
816 supplemented with 2mM biotin and 20mM DTT. Some of the eluate was run in SDS  
817 page gel and Coomassie stained to visualize the amount of enriched protein. Some

818 eluate was western blotted with streptavidin-HRP antibody to visualize protein  
819 biotinylation. The rest was processed for gel digestion and mass spectrometry (MS)  
820 analysis to identify the enriched biotinylated proteins.

821

### 822 **Immunoprecipitation (IP)**

823 To test co-IP of SCD1 with Snx14 constructs tagged with 3XFlag at the C-terminal,  
824 the cells expressing those Snx14 constructs were lysed in IPLB buffer (20mM  
825 HEPES, pH7.4, 150mM KOAc, 2mM Mg(Ac)<sub>2</sub>, 1mM EGTA, 0.6M Sorbitol,)   
826 supplemented with 1% w/v digitonin and protease inhibitor cocktail (PIC)  
827 (ThermoFisher, 78430), followed by pulse sonication. The lysate is clarified by  
828 centrifugation at 10,000g for 10 mins. 2% of the supernatant was saved as the input.  
829 The rest of the supernatant was incubated with Flag M2 affinity gel (Sigma, A2220)  
830 for 2hrs at 4°C. The beads were then washed thrice with IPLB wash buffer (IPLB,  
831 0.1% digitonin, PIC) and twice with IPLB without digitonin. The IPed proteins are  
832 eluted from the beads by incubating the beads with 400 µg/ml 3X Flag peptide in  
833 IPLB buffer for 30mins. The beads were spun down and the supernatant was  
834 collected. The supernatant and the input fraction was run in a SDS-page gel and  
835 western blotted for Flag constructs and SCD1.

836

### 837 **Western blot**

838 Whole cell lysate was prepared by scraping cultured cells, lysing them with RIPA  
839 lysis buffer containing protease inhibitor cocktail (ThermoFisher, 78430) and pulse  
840 sonication, and then clearing by centrifugation at 10,000g for 10 mins at 4°C.  
841 Samples were prepared in 4X sample loading buffer containing 5% β-  
842 mercaptoethanol and boiled at 95°C for 10 mins and then run on a 10%  
843 polyacrylamide gel. Wet transfer was run to transfer the proteins from the gel onto a  
844 PVDF membrane. The proteins on the membrane were probed by blocking the  
845 membrane with 5% milk in TBS-0.1%Tween (TBST) buffer for 1 hr at RT, incubating  
846 with primary antibodies overnight, washing with TBST thrice, incubating with HRP  
847 conjugated secondary antibodies (1:5000) and developing with Clarity™ Western  
848 ECL blotting substrate (Bio-Rad, 1705061) and imaging with X-ray film. The primary  
849 antibodies used for western blot were Rab anti-EGFP (1:2000), Mouse anti-  
850 Hsp90B1(1:1000), Mouse anti-Flag(1:1000), rabbit anti-SCD1 (1:500), guinea-pig  
851 PLIN3 (Progen, GP32), streptavidin-HRP (1:1000; Thermo Scientific, S911).

852 For quantitative densitometry, relative protein expression was quantified by  
853 analyzing band intensities using ImageJ (Fiji) and quantifying the fold change relative  
854 to untreated WT.

855

### 856 **Lipidomic profiling methods**

#### 857 **Lipid analysis**

858 All solvents were either HPLC or LC/MS grade and purchased from Sigma-Aldrich.  
859 All lipid extractions were performed in 16x100mm glass tubes with PTFE-lined caps  
860 (Fisher Scientific). Glass Pasteur pipettes and solvent-resistant plasticware pipette

861 tips (Mettler-Toledo) were used to minimize leaching of polymers and plasticizers.  
862 Fatty acid (FA) standards (FA(16:0<sup>{2}H<sub>31</sub></sup>), FA(20:4<sup>ω6</sup><sup>{2}H<sub>8</sub></sup>) and FA(22:6<sup>ω3</sup><sup>{2}H<sub>5</sub></sup>)  
863 were purchased from Cayman Chemical, and used as internal standards for total  
864 fatty acid analysis by GC-MS. SPLASH Lipidomix (Avanti Polar Lipids, Alabaster, AL,  
865 USA) was used as internal standards for lipidomic analysis by LC-MS/MS.

866

#### 867 **Total Fatty Acid Analysis by GC-MS**

868 Aliquots equivalent to 200k cells were transferred to fresh glass tubes for liquid-liquid  
869 extraction (LLE). The lipids were extracted by a three phase lipid extraction (3PLE)  
870 [54]. Briefly, 1mL of hexane, 1mL of methyl acetate, 0.75mL of acetonitrile, and 1mL  
871 of water was added to the glass tube containing the sample. The mixture was  
872 vortexed for 5 seconds and then centrifuged at 2671 $\times$ g for 5 min, resulting in  
873 separation of three distinct liquid phases. The upper (UP) and middle (MID) organic  
874 phases layers were collected into separate glass tubes and dried under N<sub>2</sub>. The  
875 dried extracts were resuspended in 1mL of 0.5M potassium hydroxide solution  
876 prepared in methanol, spiked with fatty acid internal standards, and hydrolyzed at  
877 80°C during 60 minutes. Hydrolyzed fatty acids were extracted by adding 1mL each  
878 of dichloromethane and water to the sample in hydrolysis solution. The mixture was  
879 vortexed and centrifuged at 2671 $\times$ g for 5 minutes, and the organic phase was  
880 collected to a fresh glass tube and dried under N<sub>2</sub>. Total fatty acid profiles were  
881 generated by a modified GC-MS method previously described by [55]. Briefly, dried  
882 extracts were resuspendend in 50 $\mu$ L of 1% triethylamine in acetone, and derivatized  
883 with 50 $\mu$ L of 1% pentafluorobenzyl bromide (PFBBBr) in acetone at room temperature  
884 for 25 min in capped glass tubes. Solvents were dried under N<sub>2</sub>, and samples were  
885 resuspended in 500 $\mu$ L of isooctane. Samples were analyzed using an Agilent  
886 7890/5975C (Santa Clara, CA, USA) by electron capture negative ionization (ECNI)  
887 equipped with a DB-5MS column (40m x 0.180mm with 0.18 $\mu$ m film thickness) from  
888 Agilent. Hydrogen was used as carrier gas and injection port temperature were set at  
889 300°C. Fatty acids were analyzed in selected ion monitoring (SIM) mode. The FA  
890 data was normalized to the internal standards. Fatty acid with carbon length; C  $\leq$  18  
891 were normalized to FA(16:0<sup>{2}H<sub>31</sub></sup>), C = 20 were normalized to FA(20:4 <sup>ω6</sup><sup>{2}H<sub>8</sub></sup>), and  
892 C = 22 were normalized to FA(22:6 <sup>ω3</sup><sup>{2}H<sub>5</sub></sup>). Data was processed using MassHunter  
893 software (Agilent). Abundance of lipids in each of the samples are normalized to cell  
894 number.

895

#### 896 **Lipidomic analysis by LC-MS/MS**

897 Aliquots equivalent to 200k cells were transferred to fresh glass tubes for LLE.  
898 Samples were dried under N<sub>2</sub> and extracted by Bligh/Dyer [56]; 1mL each of  
899 dichloromethane, methanol, and water were added to a glass tube containing the  
900 sample. The mixture was vortexed and centrifuged at 2671 $\times$ g for 5 min, resulting in  
901 two distinct liquid phases. The organic phase was collected to a fresh glass tube,  
902 spiked with internal standards and dried under N<sub>2</sub>. Samples were resuspendend in  
903 Hexane.

904

905 Lipids were analyzed by LC-MS/MS using a SCIEX QTRAP 6500<sup>+</sup> equipped with a  
906 Shimadzu LC-30AD (Kyoto, Japan) HPLC system and a 150 × 2.1 mm, 5µm  
907 Supelco Ascentis silica column (Bellefonte, PA, USA). Samples were injected at a  
908 flow rate of 0.3 ml/min at 2.5% solvent B (methyl tert-butyl ether) and 97.5% Solvent  
909 A (hexane). Solvent B is increased to 5% during 3 minutes and then to 60% over 6  
910 minutes. Solvent B is decreased to 0% during 30 seconds while Solvent C (90:10  
911 (v/v) Isopropanol-water) is set at 20% and increased to 40% during the following 11  
912 minutes. Solvent C is increased to 44% for 6 minutes and then to 60% during 50  
913 seconds. The system was held at 60% of solvent C during 1 minutes prior to re-  
914 equilibration at 2.5% of solvent B for 5 minutes at a 1.2mL/min flow rate. Solvent D  
915 (95:5 (v/v) Acetonitrile-water with 10mM Ammonium acetate) was infused post-  
916 column at 0.03ml/min. Column oven temperature was 25°C. Data was acquired in  
917 positive and negative ionization mode using multiple reaction monitoring (MRM).  
918 Each lipid class was normalized to its correspondent internal standard. The LC-MS  
919 data was analyzed using MultiQuant software (SCIEX). Abundance of lipids in each  
920 of the samples are normalized to cell number.

921

## 922 **Acknowledgements**

923

924 The authors would like to thank Joel Goodman, Sandra Schmid, Russell Debose-  
925 Boyd, and members of the Henne lab for help and conceptual advise in the  
926 completion of this study. We would also like to thank Dr. Philip Stanier and Dr. Dale  
927 Bryant (UCL, London, UK) for providing the SCAR20 patient cells. We acknowledge  
928 Dr. Kate Luby-Phelps and Anza Darehshouri for technical assistance with confocal  
929 and electron microscopy. We thank Dr. Andrew Lemoff for assistance with mass-  
930 spectrometry proteomics. W.M.H. is supported by funds from the Welch Foundation  
931 (I-1873), the Searle Foundation (SSP-2016-1482), the NIH NIGMS (GM119768), and  
932 the UT Southwestern Endowed Scholars Program. S.D. is supported by an AHA Pre-  
933 doctoral Fellowship Grant (20PRE35210230). JGM is supported in part by NIH 2  
934 PO1 HL20948-33 grants.

935

936

## 937 **Figure legends:**

938

### 939 **Figure 1: Snx14 deficient cells are hypersensitive to saturated fatty acids**

940

941 A. Percentage of surviving cells denoted as cell viability (%) of WT and *SNX14*<sup>KO</sup>  
942 cells, following treatment with increasing concentration (0, 250, 500, 750,  
943 1000µM) of palmitoleate (FA|16:1) for 2 days. A': Treatment of WT and *SNX14*<sup>KO</sup>  
944 cells with similar increasing concentration of oleate (FA|18:1) for 2 days. The  
945 assay was repeated thrice in triplicates. Values represent mean±SEM.

946

947 B. Cell viability (%) of WT and *SNX14*<sup>KO</sup> cells, showing *SNX14*<sup>KO</sup> cells are  
948 hypersensitive following addition of increasing concentration (0, 250, 500, 750,  
949 1000µM) of palmitate (FA|16:0) for 2 days. B': Exposure to similar increasing

950 concentration of stearate (FA|18:0) for 2 days in WT and  $SNX14^{KO}$  cells. The  
951 assay was repeated thrice in triplicates. Values represent mean $\pm$ SEM.  
952 Significance test between WT and  $SNX14^{KO}$  (n=3,  
953 \*\*\*p<0.0001, \*\*p<0.001, \*p<0.01, multiple t-test by Holm-Sidak method with alpha  
954 = 0.05)

955

956 C. Cell viability (%) of fibroblasts derived from 2 WT ( $SNX14^+/SNX14^+$ ) subjects and  
957 1 SCAR20 patient with homozygous recessive mutations in  $SNX14$ , showing  
958 hypersensitivity of SCAR20 cells following 2-day exposure to 0, 1000, 2000 $\mu$ M  
959 palmitate. The assay was repeated thrice in triplicates. Values represent  
960 mean $\pm$ SEM (n=3, \*p<0.01 relative to WT-1; ##p<0.001 and ###p<0.0001 relative to  
961 WT-2; multiple t-test by Holm-Sidak method with alpha = 0.05).

962

963 D. Cell viability (%) of WT and  $SNX14^{KO}$  cells following exposure to increasing  
964 palmitate concentration (0, 250, 500, 750, 1000  $\mu$ M) and treated with 10  $\mu$ M  
965 Etomoxir for 2 days. The assay was repeated thrice in triplicates. Values  
966 represent mean $\pm$ SEM.

967

968 E. Cell viability (%) of WT and  $SNX14^{KO}$  cells following addition of increasing  
969 palmitate concentration (0, 250, 500, 750, 1000 $\mu$ M) in presence of 50 $\mu$ M Myriocin  
970 for 2 days. The assay was repeated thrice in triplicates. Values represent  
971 mean $\pm$ SEM.

972

973 **Figure 2: Palmitate-induced hypersensitivity in  $SNX14^{KO}$  is associated with**  
974 **defective ER morphology**

975

976 A. Immunofluorescent (IF) labeling of the ER with  $\alpha$ -HSP90B1 (ER marker) antibody  
977 before and after overnight palmitate treatment in WT and  $SNX14^{KO}$  cells. Scale  
978 bar = 10 $\mu$ m. Red arrows indicating the drastic bulges in the ER. White arrows  
979 indicating each class of ER morphology where A is regular ER, B is partially  
980 fragmented ER, C is fully fragmented ER and D shows soluble ER marker.

981

982 B. Percentage of palmitate treated WT and  $SNX14^{KO}$  cells quantified and grouped  
983 based on whether the ER morphology is regular (A), partially fragmented (B), fully  
984 fragmented (C) or completely soluble (D). Total ~100 cells quantified from 3  
985 experiments. Values represent mean $\pm$ SEM.

986

987 C. TEM micrographs of WT and  $SNX14^{KO}$  cells with no palmitate treatment and with  
988 palmitate treatment for 6hr and overnight to visualize ER ultra-structure. Scale  
989 bar = 1 $\mu$ m. Scale bar of inset = 0.5  $\mu$ m. Red arrows indicate ER dilation in  
990 palmitate treated  $SNX14^{KO}$  cells.

991

992 **Supplementary Figure 2**

993

- 994 **A.** Confocal micrographs of WT and *SNX14*<sup>KO</sup> cells treated with palmitate  
995 overnight and stained with monodansylpentane (MDH) to visualize LDs  
996 (black). The cell boundary is marked by blue outline. Images are processed  
997 so that the LDs are grayscale and then inverted in Image-J. Scale bar =  
998 10µm.  
999
- 1000 **B.** Average area covered by LDs per cell of representative images from Fig S2A  
1001 is quantified. Total LD area was derived from six fields of view, each  
1002 consisting of approximately eight cells from two different sets of experiments  
1003 (total no. of cells ~90; \*\*\*p < 0.0001 unpaired t test with  $\alpha = 0.05$ ).  
1004
- 1005 **C.** RT-PCR data of spliced Xbp1 mRNA levels which is an indicator of UPR  
1006 activity in WT and *SNX14*<sup>KO</sup> cells treated with palmitate for indicated time.  
1007 Tunicamycin (Tm) treatment for 6hr (5 µg/ml) used as control which induces  
1008 UPR activity.  
1009
- 1010 **D.** Cell viability (%) of WT and *SNX14*<sup>KO</sup> cells following 2 days exposure to  
1011 500µM palmitate and either untreated or treated with one of the following –a)  
1012 64µM of IRE1 inhibitor 4µ8c (b) 30 nM of PERK inhibitor GSK2606414 (c)  
1013 40µM of caspase 6/8 inhibitor SCP0094. The assay was repeated thrice in  
1014 triplicates. Values represent mean±SEM.  
1015

1016 **Figure 3: APEX2-based proteomics reveals the Snx14-associated ER-LD**  
1017 **proteome**  
1018

- 1019 **A.** Schematic diagram showing Snx14 tagged with EGFP followed by APEX2 at the  
1020 C-terminus. The reaction of biotin phenol and H<sub>2</sub>O<sub>2</sub> catalysed by APEX2  
1021 generates biotin-phenoxy radicals which covalently attaches with proteins in  
1022 proximity of ~20nm from Snx14. Following oleate treatment, APEX2 tagged  
1023 Snx14 enriches at ER-LD contacts and hence the labelling reaction is expected  
1024 to biotinylate the interactors of Snx14 at those contacts.  
1025
- 1026 **B.** Co-IF staining of cells stably expressing Snx14-EGFP-APEX2 with anti-EGFP  
1027 (green) antibody, streptavidin-conjugated Alexa647 fluorophore (biotinylated  
1028 proteins, red) antibody and LDs stained with monodansylpentane (MDH, blue)  
1029 followed by confocal imaging revealed colocalization of Snx14 and biotinylated  
1030 proteins surrounding LDs. Scale bar = 10µm.  
1031
- 1032 **C.** Biotinylated proteins pulled down by streptavidin conjugated beads from HEK293  
1033 and U2OS cells expressing Snx14-EGFP-APEX2 and no-APEX2 (negative  
1034 control) were coomassie stained. Western blotting of the same pulled down  
1035 lysates with streptavidin-HRP antibody revealed biotinylation of several proteins  
1036 in Snx14-EGFP-APEX2 relative to the negative control.  
1037
- 1038 **D.** Heat map of ~60 proteins highly enriched in Snx14-APEX2 proteomics and cross  
1039 referenced with other LD proteomics study [40-44] (black box represents



1040 detected and white box represents no detection). The heatmap also shows the  
1041 enrichment of the proteins in Snx14-APEX2 proteomics (red columns) as well as  
1042 the de-enrichment in the cyto-APEX2 and ER-APEX2 proteomics (blue columns)  
1043 (n.d. is not detected).

1044

1045 **E.** Venn diagram representing the multi-stage analysis of the Mass spectrometry  
1046 data which identified protein abundance in Snx14-EGFP-APEX2, no-APEX2 and  
1047 EGFP-APEX2-Sec61. 2376 proteins are enriched >2 fold in Snx14-EGFP-APEX2  
1048 (1: purple circle). Among them 674 which are also enriched in APEX2 tagged  
1049 Sec61 are excluded (2 : black circle). 305 of (1) are ER-associated according to  
1050 Gene ontology analysis (3: red circle). Again 310 of (1) comprise of genes whose  
1051 CRISPR/Cas9 deletion cause palmitate sensitivity [46] (4 : yellow circle). Overlap  
1052 of sets (1),(3) and (4) consist of 29 ER-associated proteins which are enriched for  
1053 Snx14 and important for palmitate metabolism. This set belong to Snx14  
1054 interactome and is compared with its fly homolog Snz interactome. This final  
1055 comparison indicated SCD1 as one of the top candidates.

1056

1057 **F.** Cell viability of WT and *SNX14*<sup>KO</sup> cells treated with 4 $\mu$ M SCDi along with  
1058 increasing palmitate concentration (0, 250, 500 $\mu$ M) for 2 days. D'. The assay was  
1059 repeated thrice in triplicates. Values represent mean $\pm$ SEM. (n=3, \*p<0.1,  
1060 \*\*p<0.001, \*\*\*p<0.0001, multiple t-test by Holm-Sidak method with alpha = 0.05)

1061

1062

### 1063 **Supplementary Figure 3**

1064

1065 **A.** Proteins enriched for Snx14 from set (1) of Fig 3E after excluding proteins  
1066 also enriched for Sec61 are plotted as log<sub>2</sub> fold enrichment relative to  
1067 negative control from HEK293 (x-axis) and U2OS cells (y-axis) and are  
1068 denoted by grey dots. Orange dots represent those proteins whose  
1069 CRISPR/Cas9 deletion results in palmitate mediated sensitivity.

1070

1071 **B.** Log<sub>2</sub> fold enrichment of proteins in APEX2-Sec61 relative to negative control  
1072 from HEK293 (x-axis) and U2OS cells (y-axis) are plotted and denoted by  
1073 grey dots.

1074

1075 **C.** Gene ontology enrichment analysis by ClueGO using Cytoscape software  
1076 grouped genes from set (1) of Fig 3E according to their association with a  
1077 cellular organelle.

1078

1079 **D.** Gene ontology enrichment analysis by ClueGO using Cytoscape software  
1080 clustered ER-localized genes from Fig S3C according to their molecular  
1081 function.

1082

1083 E. Frequency distribution of the CRISPR/Cas9 screened genes tested negative  
1084 (<-1.8) for palmitate treatment from [46] enriched specifically for Snx14  
1085 (denoted as orange dots) in Fig S3A.

1086

1087 F. Examples of some proteins including LD-associated proteins which are  
1088 specifically and highly enriched in Snx14 after analysis in Fig 3E and also has  
1089 a high negative screen score showing palmitate sensitivity similar to Snx14  
1090 from [46].

1091

1092 **Figure 4: *SNX14*<sup>KO</sup> cell lipidomic profiling is similar to cells with reduced SCD1**  
1093 **activity**

1094

1095 A. Abundance of FAs (16:0) derived from polar lipids of WT and *SNX14*<sup>KO</sup> cells  
1096 relative to untreated WT under the following conditions – no treatment,  
1097 palmitate treatment and treatment with palmitate and SCD1 inhibitor (SCD1i).  
1098 Values represent mean ± SEM (n=3, \*p<0.01, multiple t-test by Holm-Sidak  
1099 method with alpha = 0.05).

1100

1101 B. Heatmap indicating the relative change in abundance of individual lipid  
1102 species of *U2OS* WT and *SNX14*<sup>KO</sup> cells before and after palmitate treatment  
1103 relative to untreated WT cells.

1104

1105 C. Heatmap indicating the relative change in abundance of 60 different TG  
1106 species of WT and *SNX14*<sup>KO</sup> cells relative to untreated WT. These cells were  
1107 either untreated or treated with palmitate or palmitate in presence of SCD1i.  
1108 The label N indicates the number of double bonds in those group of TG  
1109 species. The vertical serial number represents a different TG species where 1  
1110 is TG|50:0|(NL-16:0) and 11 is TG|48:1|(NL-16:1) and they exhibit the most  
1111 changes in TG in the treated *SNX14*<sup>KO</sup> cells.

1112

1113 D. Abundance of TG (with 0 or 1 unsaturation) relative to untreated WT as  
1114 analyzed in WT and *SNX14*<sup>KO</sup> cells quantified from Fig 4C. Prior to lipid  
1115 extraction and lipidomics, these cells were either untreated or treated with  
1116 palmitate or palmitate in presence of SCD1i. Values represent mean±SEM  
1117 (n=3, \*p<0.01, multiple t-test by Holm-Sidak method with alpha = 0.05).

1118

1119 E. Heatmap indicating the relative change in abundance of 9 different LPC  
1120 species of WT and *SNX14*<sup>KO</sup> cells relative to untreated WT. These cells were  
1121 either untreated or treated with palmitate and palmitate in presence of SCD1i.

1122

1123 **Supplementary Figure 4**

1124

1125 A. Abundance of all fatty acids derived from polar lipids of WT and *SNX14*<sup>KO</sup> cells  
1126 relative to untreated WT under the following conditions – no treatment, palmitate

1127 treatment or treatment with palmitate and SCD1i. Values represent mean±SEM  
1128 (n=3, \*p<0.01, multiple t-test by Holm-Sidak method with alpha = 0.05).

1129

1130 B. Heatmap indicating the relative change in abundance of 5 different LPE species  
1131 of WT and *SNX14*<sup>KO</sup> cells relative to untreated WT. These cells were either  
1132 untreated or treated with palmitate or palmitate in presence of SCD1i.

1133

1134 C. Heatmap indicating the relative change in abundance of 7 different PS species of  
1135 WT and *SNX14*<sup>KO</sup> cells relative to untreated WT. These cells were either  
1136 untreated or treated with palmitate or palmitate in presence of SCD1i.

1137

1138 D. Heatmap indicating the relative change in abundance of 24 different PC species  
1139 of WT and *SNX14*<sup>KO</sup> cells relative to untreated WT. These cells were either  
1140 untreated or treated with palmitate or palmitate in presence of SCD1i.

1141

### 1142 **Figure 5: SCD1 activity can rescue *SNX14*<sup>KO</sup> palmitate-induced lipotoxicity**

1143

1144 **A.** Western blot of SCD1 and Hsp90B1 (ER marker) before and after overnight  
1145 palmitate treatment in WT, *SNX14*<sup>KO</sup> and Snx14Flag over-expressed (O/E)  
1146 cells.

1147

1148 **B.** Ratio of the intensity of the protein bands of SCD1 over Hsp90B1 are  
1149 quantified from Fig 5A, and plotted as fold change relative to untreated WT  
1150 whose ratio is set as 1. Values represent mean ± SEM. Significance test  
1151 between before and after palmitate treatment denoted as # (n=3, #p<0.1,  
1152 ##p<0.001, multiple t-test by Holm-Sidak method with alpha = 0.05).  
1153 Significance test between WT, *SNX14*<sup>KO</sup> and Snx14FlagO/E is denoted as  
1154 \*(n=3, \*p<0.01, multiple t-test by Holm-Sidak method with alpha = 0.05)

1155

1156 **C.** Cell viability (%) of WT and *SNX14*<sup>KO</sup> cells, showing sensitivity of both WT  
1157 and *SNX14*<sup>KO</sup> cells are rescued with overexpression of SCD1 following  
1158 addition of increasing concentration (0, 500, 750, 1000µM) of palmitate for 2  
1159 days. The assay was repeated thrice in triplicates. Values represent  
1160 mean±SEM. Significance test between WT and WT+SCD1 denoted as \* (n=3,  
1161 \*\*p<0.001, \*\*\*p<0.0001, multiple t-test by Holm-Sidak method with alpha =  
1162 0.05) Significance test between *SNX14*<sup>KO</sup> and *SNX14*<sup>KO</sup>+SCD1 denoted as #  
1163 (n=3, ##p<0.001, ###p<0.0001, multiple t-test by Holm-Sidak method with alpha  
1164 = 0.05).

1165

1166 **D.** TLC of neutral lipids and FFAs performed in WT and *SNX14*<sup>KO</sup> cells treated  
1167 with 500µM palmitate for 0, 2, 4, 8, 16 hours. Quantification of relative fold  
1168 change in FFA (normalized to cell pellet weight) with respect to untreated WT  
1169 from this TLC. Values represent mean±SEM (n=3, \*p<0.01, multiple t-test by  
1170 Holm-Sidak method with alpha = 0.05).

1171

1172 **E.** TLC of neutral lipids and FFAs performed in WT and *SNX14*<sup>KO</sup> cells before  
1173 and after overexpression of SCD1 following exposure to 500 $\mu$ M palmitate for  
1174 0, 4, 16 hours. Quantification of relative fold change in FFA (normalized to cell  
1175 pellet weight) with respect to untreated WT from this TLC. Values represent  
1176 mean $\pm$ SEM (n=3, \*p<0.01, \*\*p<0.001, multiple t-test by Holm-Sidak method  
1177 with alpha = 0.05).

1178

1179 **F.** Immunofluorescent (IF) labeling of the ER with  $\alpha$ -HSP90B1 (ER marker)  
1180 antibody in *SNX14*<sup>KO</sup> cells before and after overexpression of SCD1 following  
1181 overnight palmitate treatment. Scale bar = 10 $\mu$ m.

1182

1183 **G.** Percentage of palmitate treated WT and *SNX14*<sup>KO</sup> cells quantified and  
1184 grouped based on whether the ER morphology is regular (A), partially  
1185 fragmented (B), fully fragmented (C) or completely soluble (D). Total ~100  
1186 cells quantified from 3 experiments. Values represent mean $\pm$ SEM.

1187

## 1188 **Supplementary Figure 5**

1189

1190 **A.** Cell viability (%) shows increase in surviving WT and *SNX14*<sup>KO</sup> cells when  
1191 treatment with 1mM palmitate is supplemented with 100 and 200 $\mu$ M of oleate.  
1192 The assay was repeated thrice in triplicates. Values represent mean $\pm$ SEM  
1193 (\*\*p<0.001, multiple t-test by Holm-Sidak method with alpha = 0.05,  
1194 significance test between oleate treatment with non-oleate treatment).

1195

1196 **B.** Cell viability (%) of WT and *SNX14*<sup>KO</sup> cells, showing sensitivity of both WT  
1197 and *SNX14*<sup>KO</sup> cells are reduced with reintroduction of SCD1 in presence of  
1198 DGAT1/2 inhibitors (DGATi) following addition of increasing concentration (0,  
1199 500, 750, 1000 $\mu$ M) of palmitate for 2 days. The assay was repeated thrice in  
1200 triplicates. Values represent mean $\pm$ SEM. Significance test between WT and  
1201 WT+SCD1+DGATi denoted as \* (n=3, \*p<0.01, \*\*p<0.001, \*\*\*p<0.0001,  
1202 multiple t-test by Holm-Sidak method with alpha = 0.05) Significance test  
1203 between *SNX14*<sup>KO</sup> and *SNX14*<sup>KO</sup>+SCD1+DGATi denoted as # (n=3,  
1204 ##p<0.001, ### p<0.0001, multiple t-test by Holm-Sidak method with alpha =  
1205 0.05).

1206

1207 **C.** TLC of neutral lipids and FFAs performed in WT and *SNX14*<sup>KO</sup> cells treated  
1208 with 500 $\mu$ M palmitate for 0, 2, 4, 8, 16 hours.

1209

1210 **D.** TLC of neutral lipids and FFAs performed in WT and *SNX14*<sup>KO</sup> cells before  
1211 and after overexpression of SCD1 following exposure to 500 $\mu$ M palmitate for  
1212 0, 4, 16 hours.

1213

1214 **E.** Fatty acid uptake in WT, *SNX14*<sup>KO</sup> cells and *SNX14*<sup>KO</sup> cells expressing either  
1215 EV, Snx14<sup>FL</sup>, or Snx14<sup>FLΔPXA</sup> following exposure to <sup>14</sup>C palmitate for 15, 30, 60  
1216 mins quantified relative to WT treated with 15 min <sup>14</sup>C palmitate.

1217

### 1218 **Figure 6: Snx14 interacts with SCD1 in the ER network**

1219

1220 **A.** Western blotting with anti-Flag and anti-SCD1 antibody of 2% input lysate from  
1221 GFP-Flag and Snx14-Flag expressing cells with and without palmitate treatment  
1222 reveals relative expression of GFP-Flag, Snx14-Flag and SCD1. Co-  
1223 immunoprecipitation (Co-IP) of SCD1 with Flag tagged constructs reveals  
1224 presence of SCD1 in Snx14-Flag and not GFP-Flag enriched beads when  
1225 western blotted with anti-Flag and anti-SCD1 antibody.

1226

1227 **B.** Schematic diagram of Snx14 fragments C-terminally tagged with either 3X Flag  
1228 or EGFP. Snx14<sup>FL</sup> depicts the full length human Snx14. Snx14<sup>N</sup> is the N-terminal  
1229 fragment that spans from the beginning and includes TM, PXA and RGS  
1230 domains. Snx14<sup>PXCN</sup> is the C-terminal half including the PX domain and C-Nexin  
1231 domains.

1232

1233 **C.** Lanes represent 2% input and IP from GFP-Flag, all 3XFlag tagged Snx14  
1234 constructs (Snx14<sup>FL</sup>, Snx14<sup>N</sup>, Snx14<sup>PXCN</sup>) and SCD1i treated Snx14<sup>FL</sup>-3XFlag  
1235 expressing U2OS cells. Western blotting with anti-Flag and anti-SCD1 antibody  
1236 reveals relative expression of all the Flag tagged constructs and SCD1 in all  
1237 these samples.

1238

1239 **D.** IF staining of U2OS cells expressing Snx14<sup>FL</sup>, Snx14<sup>N</sup>, Snx14<sup>PXCN</sup> with anti-  
1240 EGFP(green), anti-SCD1(red) antibody and imaged with confocal microscope.  
1241 LDs were stained with MDH (blue). The cells were either untreated or treated with  
1242 oleate. Scale bar = 10 μm.

1243

### 1244 **Supplementary Figure 6**

1245

1246 **A.** Lanes represent 2% input and IP from GFP-Flag and Snx14<sup>FL</sup>-3XFlag expressing  
1247 U2OS cells with oleate and palmitate treatment respectively. Western blotting  
1248 with anti-Flag and anti-PLIN3 antibody reveals relative expression of all the Flag  
1249 tagged constructs and PLIN3 in all these samples. Snx14<sup>FL</sup>-3XFlag similar to  
1250 GFP-Flag could not co-IP PLIN3.

1251

1252 **B.** IF staining of U2OS cells expressing Snx14<sup>FL</sup>, Snx14<sup>N</sup>, Snx14<sup>PXCN</sup> with anti-  
1253 EGFP(green), anti-SCD1(red) antibody and imaged with confocal microscope.  
1254 LDs were stained with MDH (blue). The cells were either untreated or treated with  
1255 oleate. Scale bar = 10 μm.

1256 **Figure 7: Snx14 loss does not impact SCD1 enzymatic activity, but Snx14**  
1257 **requires FA-binding PXA domain for function**

1258 A. SCD1 enzyme activity quantified in WT, SNX14-KO and SCD1i-treated WT  
1259 cells relative to WT cells. Values represent mean±SEM (n=2, \*\*p<0.001,  
1260 multiple t-test by Holm-Sidak method with alpha = 0.05).

1261

1262 B. Schematic diagram of Snx14 fragments C-terminally tagged with 3X Flag.  
1263 Snx14<sup>FL</sup> depicts the full length human Snx14. Snx14<sup>FLΔPXA</sup> and Snx14<sup>FLΔTM</sup> are  
1264 the full length Snx14 excluding the PXA domain and TM domain respectively.  
1265

1266 C. Lanes represent 1% input and IP from GFP-Flag, 3XFlag tagged Snx14  
1267 constructs (Snx14<sup>FL</sup>, Snx14<sup>FLΔPXA</sup>, Snx14<sup>FLΔTM</sup>) expressing U2OS cells.  
1268 Western blotting with anti-Flag and anti-SCD1 antibody reveals relative  
1269 expression of all the Flag tagged constructs and SCD1 in all these samples.  
1270 Snx14<sup>FLΔPXA</sup> could co-IP SCD1 similar to Snx14<sup>FL</sup> whereas Snx14<sup>FLΔTM</sup> could  
1271 not pull down SCD1.  
1272

1273 D. Quantification of fold change in FFA (normalized to cell pellet weight) relative  
1274 to untreated WT from TLC of whole cell neutral lipids extracted from WT,  
1275 SNX14<sup>KO</sup>, SNX14<sup>KO</sup> cells expressing either EV, Snx14<sup>FL</sup>, or Snx14<sup>FLΔPXA</sup>  
1276 which are either untreated or treated with palmitate for 4hr. Values represent  
1277 mean±SEM (n=3, \*p<0.01, multiple t-test by Holm-Sidak method with alpha =  
1278 0.05).  
1279

1280 E. Cell death (%) after exposure to 500μM of palmitate in WT, SNX14<sup>KO</sup>, and on  
1281 re-addition of empty vector (EV), Snx14<sup>FL</sup>, Snx14<sup>N</sup>, Snx14<sup>PXCN</sup>, Snx14<sup>FLΔTM</sup>,  
1282 Snx14<sup>FLΔPXA</sup> to SNX14<sup>KO</sup>. Values represent mean±SEM. Significance test  
1283 compared with WT is denoted as \* (n=3, \*p<0.01, multiple t-test analysis by  
1284 Holm-Sidak method with alpha = 0.05).  
1285

1286 **Figure 8: Working model for Snx14 in maintaining ER lipid homeostasis when**  
1287 **treated with excessive SFAs.**

1288

1289

1290 **References**

1291

- 1292 1. Schaffer, J.E., *Lipotoxicity: when tissues overeat*. Curr Opin Lipidol, 2003. **14**(3): p.  
1293 281-7.
- 1294 2. Lelliott, C. and A.J. Vidal-Puig, *Lipotoxicity, an imbalance between lipogenesis de*  
1295 *novo and fatty acid oxidation*. Int J Obes Relat Metab Disord, 2004. **28 Suppl 4**: p.  
1296 S22-8.

- 1297 3. Ertunc, M.E. and G.S. Hotamisligil, *Lipid signaling and lipotoxicity in metaflammation: indications for metabolic disease pathogenesis and treatment*. J Lipid Res, 2016. 1298 **57**(12): p. 2099-2114. 1299
- 1300 4. Kusminski, C.M., et al., *Diabetes and apoptosis: lipotoxicity*. Apoptosis, 2009. **14**(12): 1301 p. 1484-95.
- 1302 5. Ye, R., T. Onodera, and P.E. Scherer, *Lipotoxicity and beta Cell Maintenance in Obesity and Type 2 Diabetes*. J Endocr Soc, 2019. **3**(3): p. 617-631. 1303
- 1304 6. Borradaile, N.M. and J.E. Schaffer, *Lipotoxicity in the heart*. Curr Hypertens Rep, 1305 2005. **7**(6): p. 412-7.
- 1306 7. Schaffer, J.E., *Lipotoxicity: Many Roads to Cell Dysfunction and Cell Death: Introduction to a Thematic Review Series*. J Lipid Res, 2016. **57**(8): p. 1327-8. 1307
- 1308 8. Bruce, K.D., A. Zsombok, and R.H. Eckel, *Lipid Processing in the Brain: A Key Regulator of Systemic Metabolism*. Front Endocrinol (Lausanne), 2017. **8**: p. 60. 1309
- 1310 9. Estadella, D., et al., *Lipotoxicity: effects of dietary saturated and transfatty acids*. Mediators Inflamm, 2013. **2013**: p. 137579. 1311
- 1312 10. Piccolis, M., et al., *Probing the Global Cellular Responses to Lipotoxicity Caused by Saturated Fatty Acids*. Mol Cell, 2019. **74**(1): p. 32-44 e8. 1313
- 1314 11. Hetherington, A.M., et al., *Differential Lipotoxic Effects of Palmitate and Oleate in Activated Human Hepatic Stellate Cells and Epithelial Hepatoma Cells*. Cell Physiol Biochem, 2016. **39**(4): p. 1648-62. 1315
- 1316 12. Borradaile, N.M., et al., *Disruption of endoplasmic reticulum structure and integrity in lipotoxic cell death*. J Lipid Res, 2006. **47**(12): p. 2726-37. 1317
- 1318 13. Listenberger, L.L., et al., *Triglyceride accumulation protects against fatty acid-induced lipotoxicity*. Proc Natl Acad Sci U S A, 2003. **100**(6): p. 3077-82. 1319
- 1320 14. Fujimoto, T. and R.G. Parton, *Not just fat: the structure and function of the lipid droplet*. Cold Spring Harb Perspect Biol, 2011. **3**(3). 1321
- 1322 15. Plotz, T., et al., *The role of lipid droplet formation in the protection of unsaturated fatty acids against palmitic acid induced lipotoxicity to rat insulin-producing cells*. Nutr Metab (Lond), 2016. **13**: p. 16. 1323
- 1324 16. Wilfling, F., et al., *Triacylglycerol synthesis enzymes mediate lipid droplet growth by relocalizing from the ER to lipid droplets*. Dev Cell, 2013. **24**(4): p. 384-99. 1325
- 1326 17. Szymanski, K.M., et al., *The lipodystrophy protein seipin is found at endoplasmic reticulum lipid droplet junctions and is important for droplet morphology*. Proc Natl Acad Sci U S A, 2007. **104**(52): p. 20890-5. 1327
- 1328 18. Salo, V.T., et al., *Seipin Facilitates Triglyceride Flow to Lipid Droplet and Counteracts Droplet Ripening via Endoplasmic Reticulum Contact*. Dev Cell, 2019. **50**(4): p. 478-493 e9. 1329
- 1330 19. Xu, N., et al., *The FATP1-DGAT2 complex facilitates lipid droplet expansion at the ER-lipid droplet interface*. J Cell Biol, 2012. **198**(5): p. 895-911. 1331
- 1332 20. Thomas, A.C., et al., *Mutations in SNX14 cause a distinctive autosomal-recessive cerebellar ataxia and intellectual disability syndrome*. Am J Hum Genet, 2014. **95**(5): 1333 p. 611-21.
- 1334 21. Shukla, A., et al., *Autosomal recessive spinocerebellar ataxia 20: Report of a new patient and review of literature*. Eur J Med Genet, 2017. **60**(2): p. 118-123. 1335
- 1336 22. Akizu, N., et al., *Biallelic mutations in SNX14 cause a syndromic form of cerebellar atrophy and lysosome-autophagosome dysfunction*. Nat Genet, 2015. **47**(5): p. 528-34. 1337
- 1338
- 1339
- 1340
- 1341
- 1342
- 1343

- 1344 23. Datta, S., et al., *Cerebellar ataxia disease-associated Snx14 promotes lipid droplet*  
1345 *growth at ER-droplet contacts*. J Cell Biol, 2019. **218**(4): p. 1335-1351.
- 1346 24. Bryant, D., et al., *SNX14 mutations affect endoplasmic reticulum-associated neutral*  
1347 *lipid metabolism in autosomal recessive spinocerebellar ataxia 20*. Hum Mol Genet,  
1348 2018. **27**(11): p. 1927-1940.
- 1349 25. Hariri, H., et al., *Mdm1 maintains endoplasmic reticulum homeostasis by spatially*  
1350 *regulating lipid droplet biogenesis*. J Cell Biol, 2019. **218**(4): p. 1319-1334.
- 1351 26. Ugrankar, R., et al., *Drosophila Snazarus Regulates a Lipid Droplet Population at*  
1352 *Plasma Membrane-Droplet Contacts in Adipocytes*. Dev Cell, 2019. **50**(5): p. 557-572  
1353 e5.
- 1354 27. Blackstone, C., C.J. O'Kane, and E. Reid, *Hereditary spastic paraplegias: membrane*  
1355 *traffic and the motor pathway*. Nat Rev Neurosci, 2011. **12**(1): p. 31-42.
- 1356 28. Yamanaka, T. and N. Nukina, *ER Dynamics and Derangement in Neurological*  
1357 *Diseases*. Front Neurosci, 2018. **12**: p. 91.
- 1358 29. Adibhatla, R.M. and J.F. Hatcher, *Altered lipid metabolism in brain injury and*  
1359 *disorders*. Subcell Biochem, 2008. **49**: p. 241-68.
- 1360 30. Feoktistova, M., P. Geserick, and M. Leverkus, *Crystal Violet Assay for Determining*  
1361 *Viability of Cultured Cells*. Cold Spring Harb Protoc, 2016. **2016**(4): p. pdb  
1362 prot087379.
- 1363 31. Chu, B.B., et al., *Cholesterol transport through lysosome-peroxisome membrane*  
1364 *contacts*. Cell, 2015. **161**(2): p. 291-306.
- 1365 32. Spigoni, V., et al., *Stearic acid at physiologic concentrations induces in vitro*  
1366 *lipotoxicity in circulating angiogenic cells*. Atherosclerosis, 2017. **265**: p. 162-171.
- 1367 33. Turpin, S.M., et al., *Apoptosis in skeletal muscle myotubes is induced by ceramides*  
1368 *and is positively related to insulin resistance*. Am J Physiol Endocrinol Metab, 2006.  
1369 **291**(6): p. E1341-50.
- 1370 34. Ellingson, J.S., E.E. Hill, and W.E. Lands, *The control of fatty acid composition in*  
1371 *glycerolipids of the endoplasmic reticulum*. Biochim Biophys Acta, 1970. **196**(2): p.  
1372 176-92.
- 1373 35. Bell, R.M. and R.A. Coleman, *Enzymes of glycerolipid synthesis in eukaryotes*. Annu  
1374 Rev Biochem, 1980. **49**: p. 459-87.
- 1375 36. Schrauwen, P., et al., *Mitochondrial dysfunction and lipotoxicity*. Biochim Biophys  
1376 Acta, 2010. **1801**(3): p. 266-71.
- 1377 37. Haffar, T., F. Berube-Simard, and N. Bousette, *Impaired fatty acid oxidation as a*  
1378 *cause for lipotoxicity in cardiomyocytes*. Biochem Biophys Res Commun, 2015. **468**(1-  
1379 2): p. 73-8.
- 1380 38. Shen, Y., et al., *Metabolic activity induces membrane phase separation in*  
1381 *endoplasmic reticulum*. Proc Natl Acad Sci U S A, 2017. **114**(51): p. 13394-13399.
- 1382 39. Hung, V., et al., *Spatially resolved proteomic mapping in living cells with the*  
1383 *engineered peroxidase APEX2*. Nat Protoc, 2016. **11**(3): p. 456-75.
- 1384 40. Kraemer, N., et al., *Protein correlation profiles identify lipid droplet proteins with*  
1385 *high confidence*. Mol Cell Proteomics, 2013. **12**(5): p. 1115-26.
- 1386 41. Beller, M., et al., *Characterization of the Drosophila lipid droplet subproteome*. Mol  
1387 Cell Proteomics, 2006. **5**(6): p. 1082-94.
- 1388 42. Ding, Y., et al., *Proteomic profiling of lipid droplet-associated proteins in primary*  
1389 *adipocytes of normal and obese mouse*. Acta Biochim Biophys Sin (Shanghai), 2012.  
1390 **44**(5): p. 394-406.



- 1391 43. Beller, M., et al., *COPI complex is a regulator of lipid homeostasis*. PLoS Biol, 2008.  
1392 **6**(11): p. e292.
- 1393 44. Bersuker, K., et al., *A Proximity Labeling Strategy Provides Insights into the*  
1394 *Composition and Dynamics of Lipid Droplet Proteomes*. Dev Cell, 2018. **44**(1): p. 97-  
1395 112 e7.
- 1396 45. Kumar, N., et al., *VPS13A and VPS13C are lipid transport proteins differentially*  
1397 *localized at ER contact sites*. J Cell Biol, 2018. **217**(10): p. 3625-3639.
- 1398 46. Zhu, X.G., et al., *CHP1 Regulates Compartmentalized Glycerolipid Synthesis by*  
1399 *Activating GPAT4*. Mol Cell, 2019. **74**(1): p. 45-58 e7.
- 1400 47. Paton, C.M. and J.M. Ntambi, *Biochemical and physiological function of stearoyl-CoA*  
1401 *desaturase*. Am J Physiol Endocrinol Metab, 2009. **297**(1): p. E28-37.
- 1402 48. Miyazaki, M., et al., *The biosynthesis of hepatic cholesterol esters and triglycerides is*  
1403 *impaired in mice with a disruption of the gene for stearoyl-CoA desaturase 1*. J Biol  
1404 Chem, 2000. **275**(39): p. 30132-8.
- 1405 49. Miyazaki, M., Y.C. Kim, and J.M. Ntambi, *A lipogenic diet in mice with a disruption of*  
1406 *the stearoyl-CoA desaturase 1 gene reveals a stringent requirement of endogenous*  
1407 *monounsaturated fatty acids for triglyceride synthesis*. J Lipid Res, 2001. **42**(7): p.  
1408 1018-24.
- 1409 50. Uto, Y., et al., *Discovery of novel SCD1 inhibitors: 5-alkyl-4,5-dihydro-3H-spiro[1,5-*  
1410 *benzoxazepine-2,4'-piperidine] analogs*. Eur J Med Chem, 2011. **46**(5): p. 1892-6.
- 1411 51. Olzmann, J.A. and P. Carvalho, *Dynamics and functions of lipid droplets*. Nat Rev Mol  
1412 Cell Biol, 2019. **20**(3): p. 137-155.
- 1413 52. Hariri, H., et al., *Lipid droplet biogenesis is spatially coordinated at ER-vacuole*  
1414 *contacts under nutritional stress*. EMBO Rep, 2018. **19**(1): p. 57-72.
- 1415 53. Bligh, E.G. and W.J. Dyer, *A rapid method of total lipid extraction and purification*.  
1416 Can J Biochem Physiol, 1959. **37**(8): p. 911-7.
- 1417 54. Vale, G., et al., *Three-phase liquid extraction: a simple and fast method for lipidomic*  
1418 *workflows*. J Lipid Res, 2019. **60**(3): p. 694-706.
- 1419 55. Quehenberger, O., A.M. Armando, and E.A. Dennis, *High sensitivity quantitative*  
1420 *lipidomics analysis of fatty acids in biological samples by gas chromatography-mass*  
1421 *spectrometry*. Biochim Biophys Acta, 2011. **1811**(11): p. 648-56.
- 1422 56. Bligh, E.G. and W.J. Dyer, *A rapid method of total lipid extraction and purification*.  
1423 Canadian Journal of Biochemistry and Physiology, 1959. **37**: p. 911-917.
- 1424

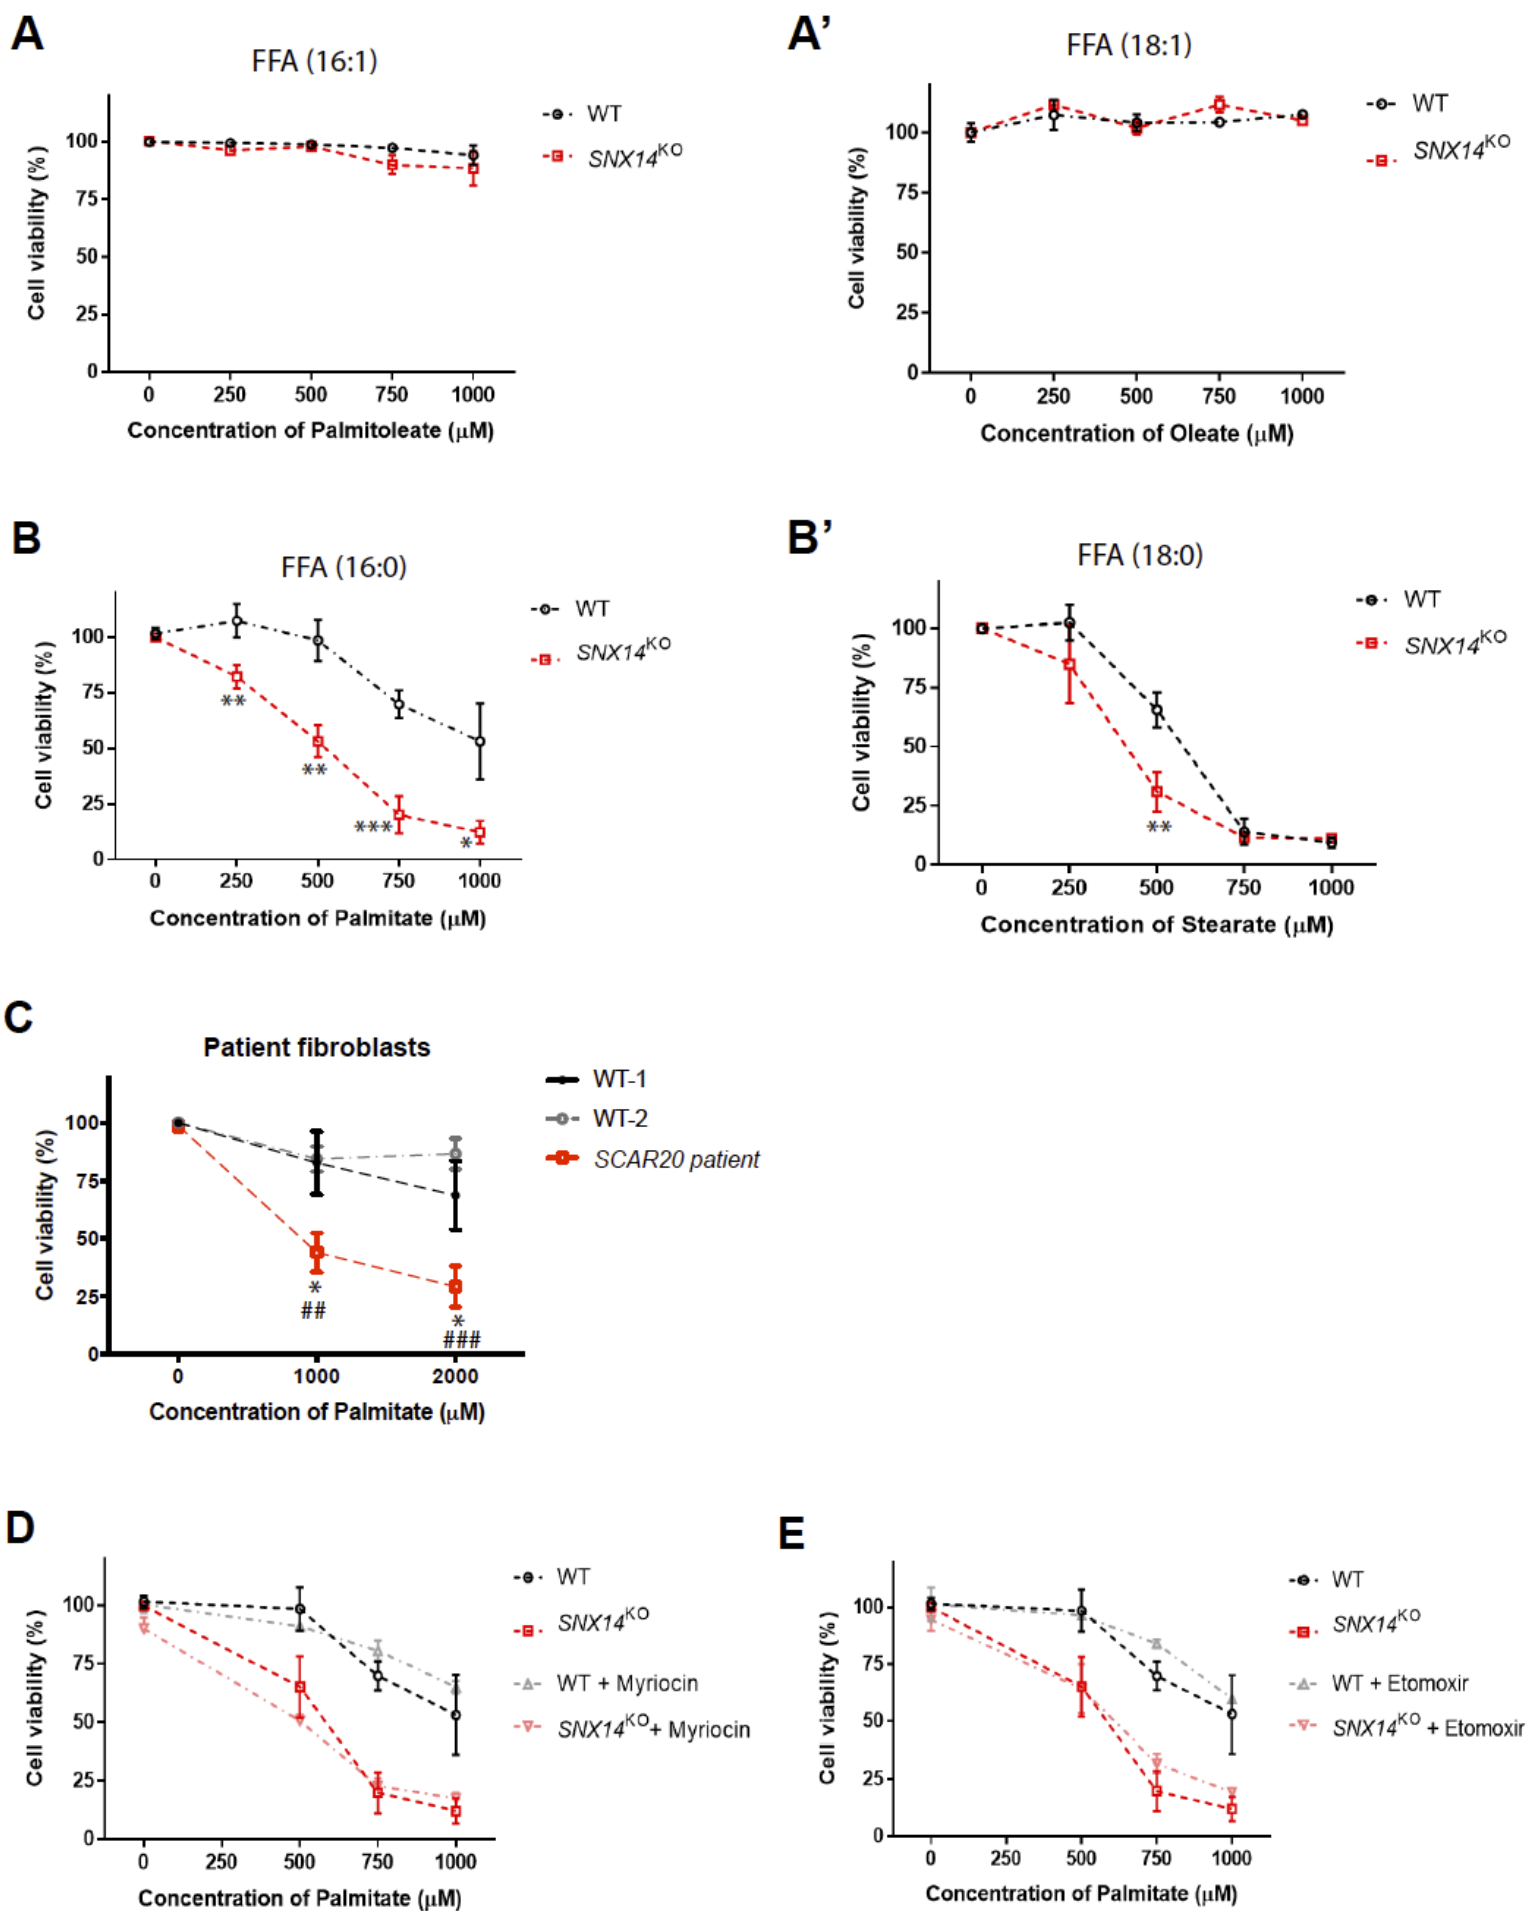

Figure 1

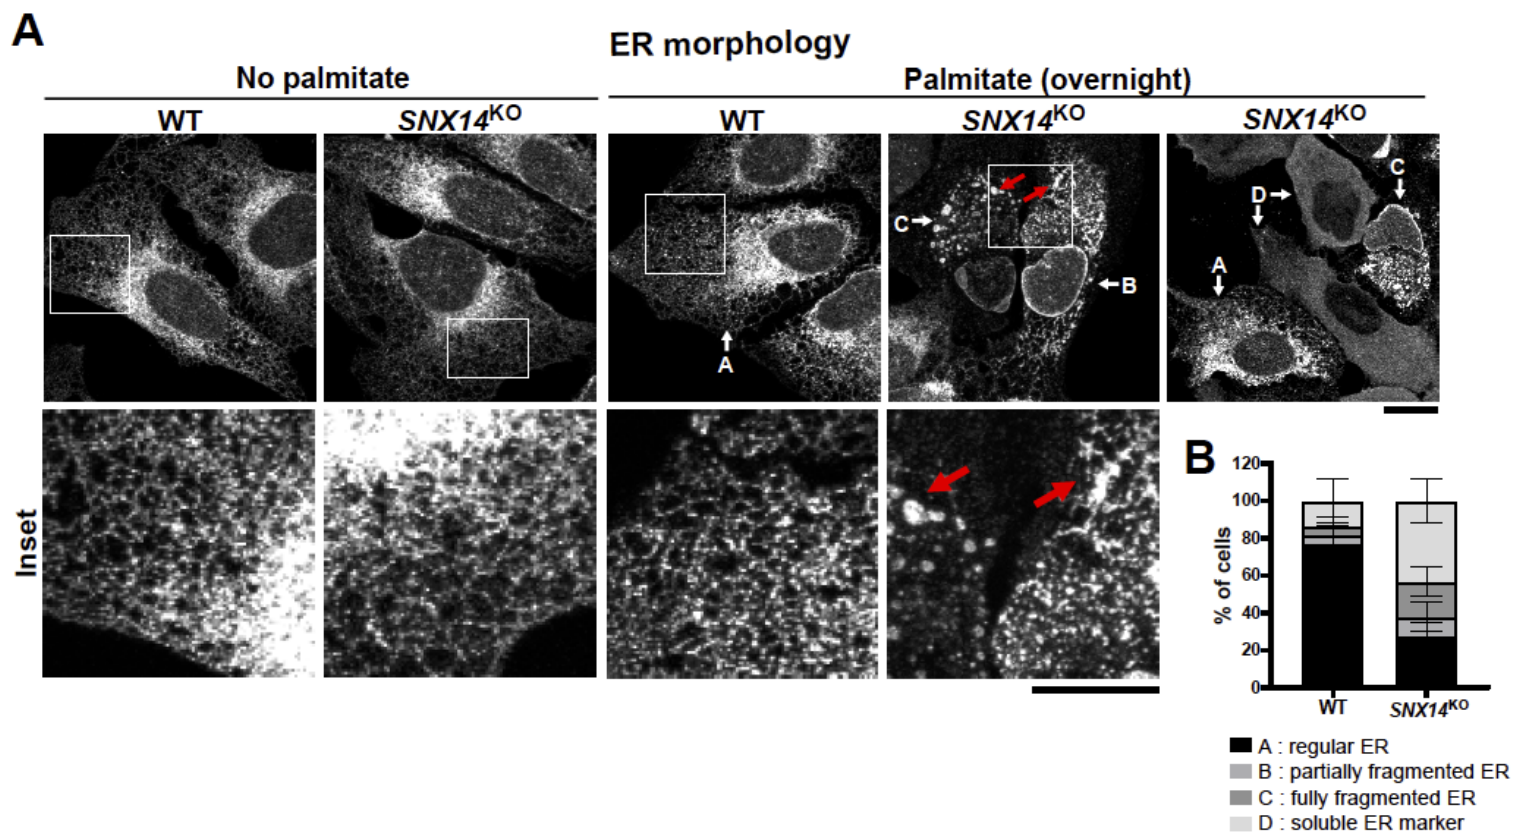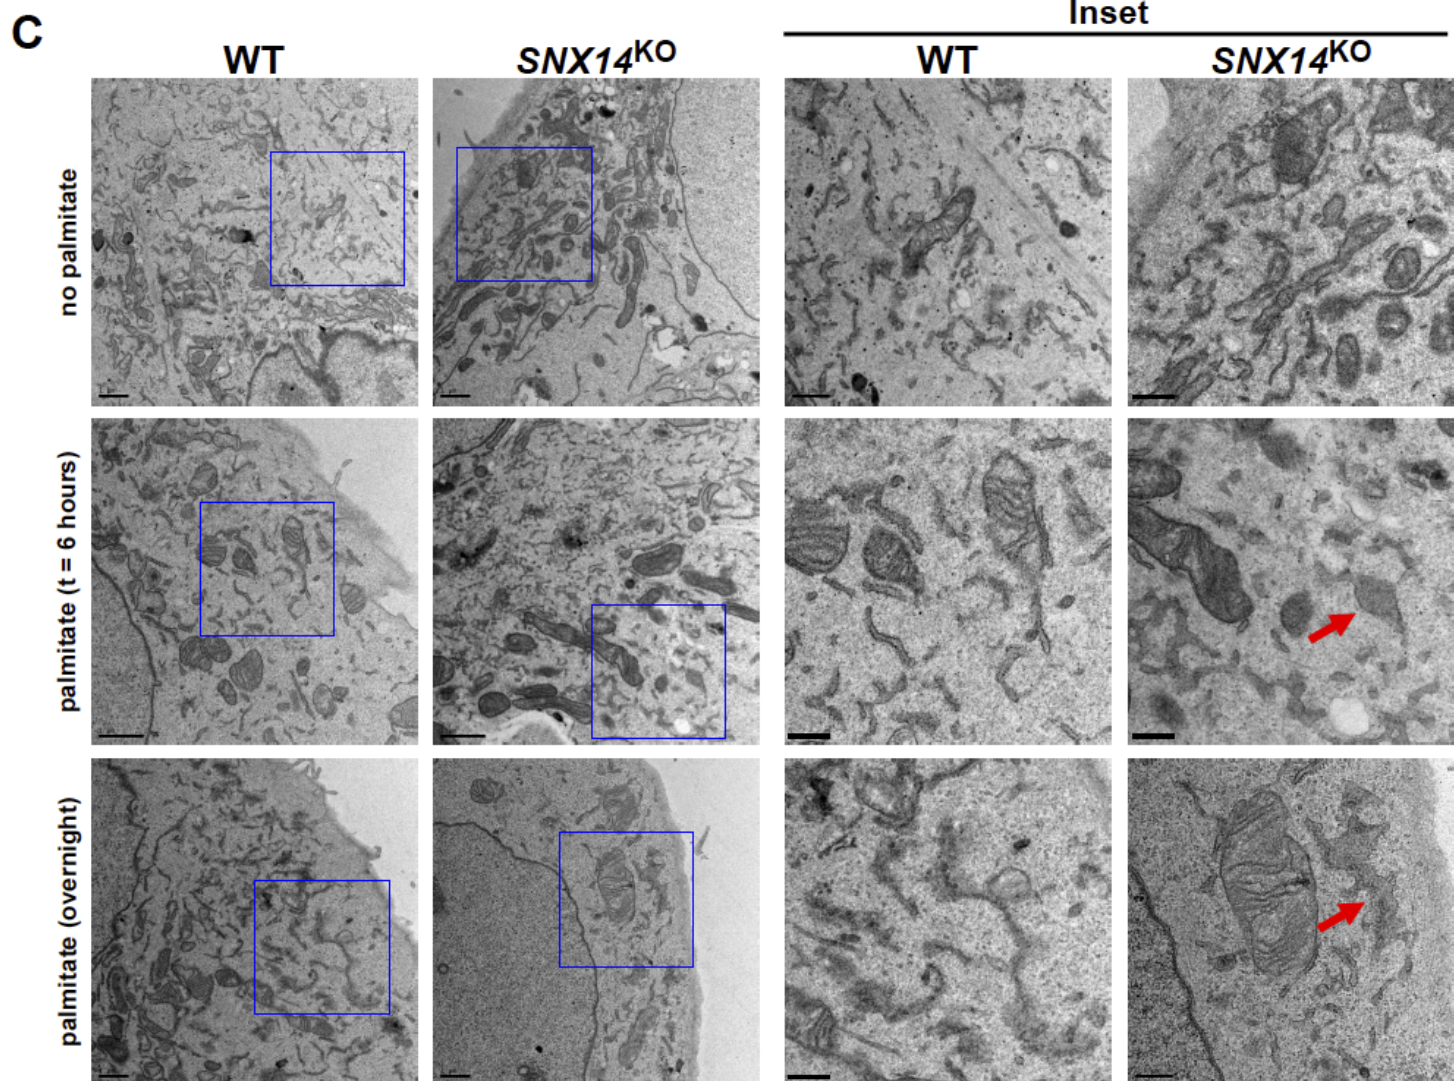

Figure 2

**A**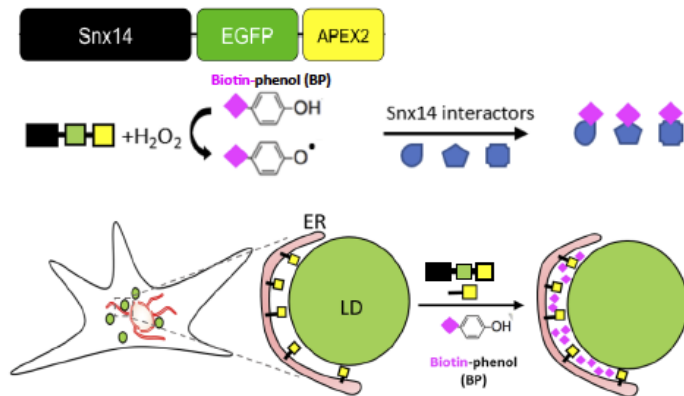**B**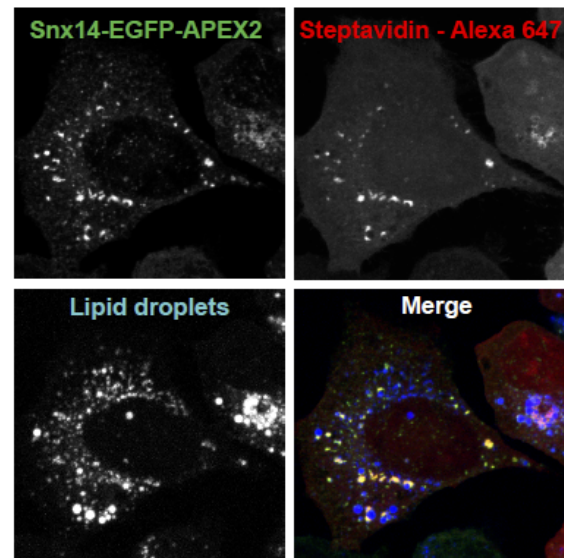**C**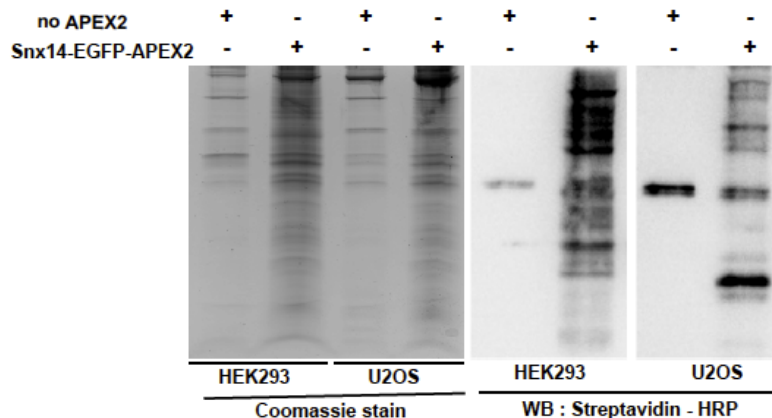**D**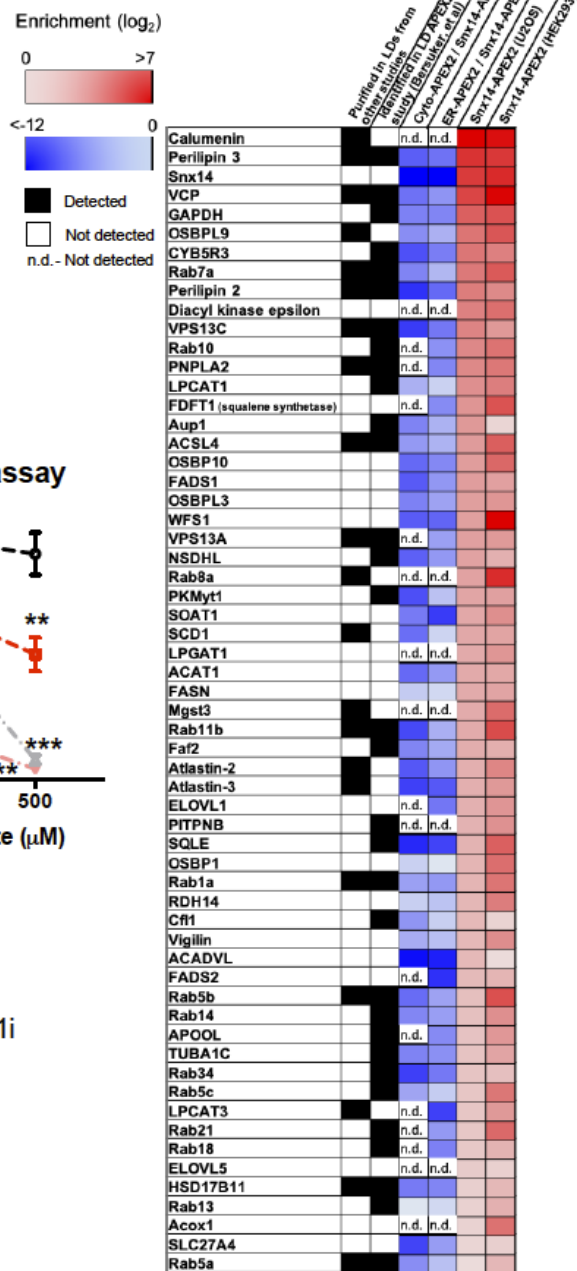**E**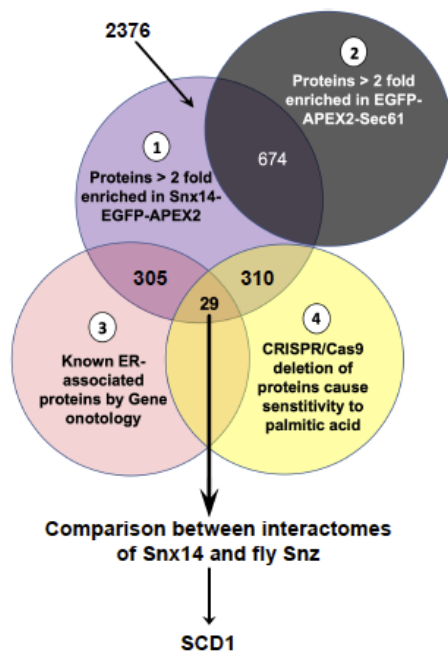**F**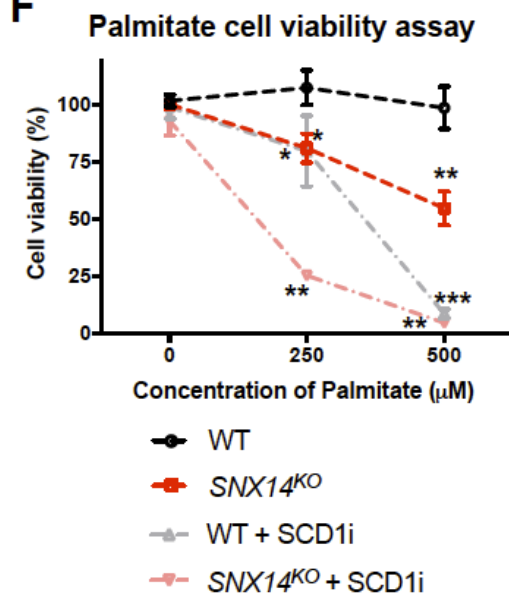**Figure 3**

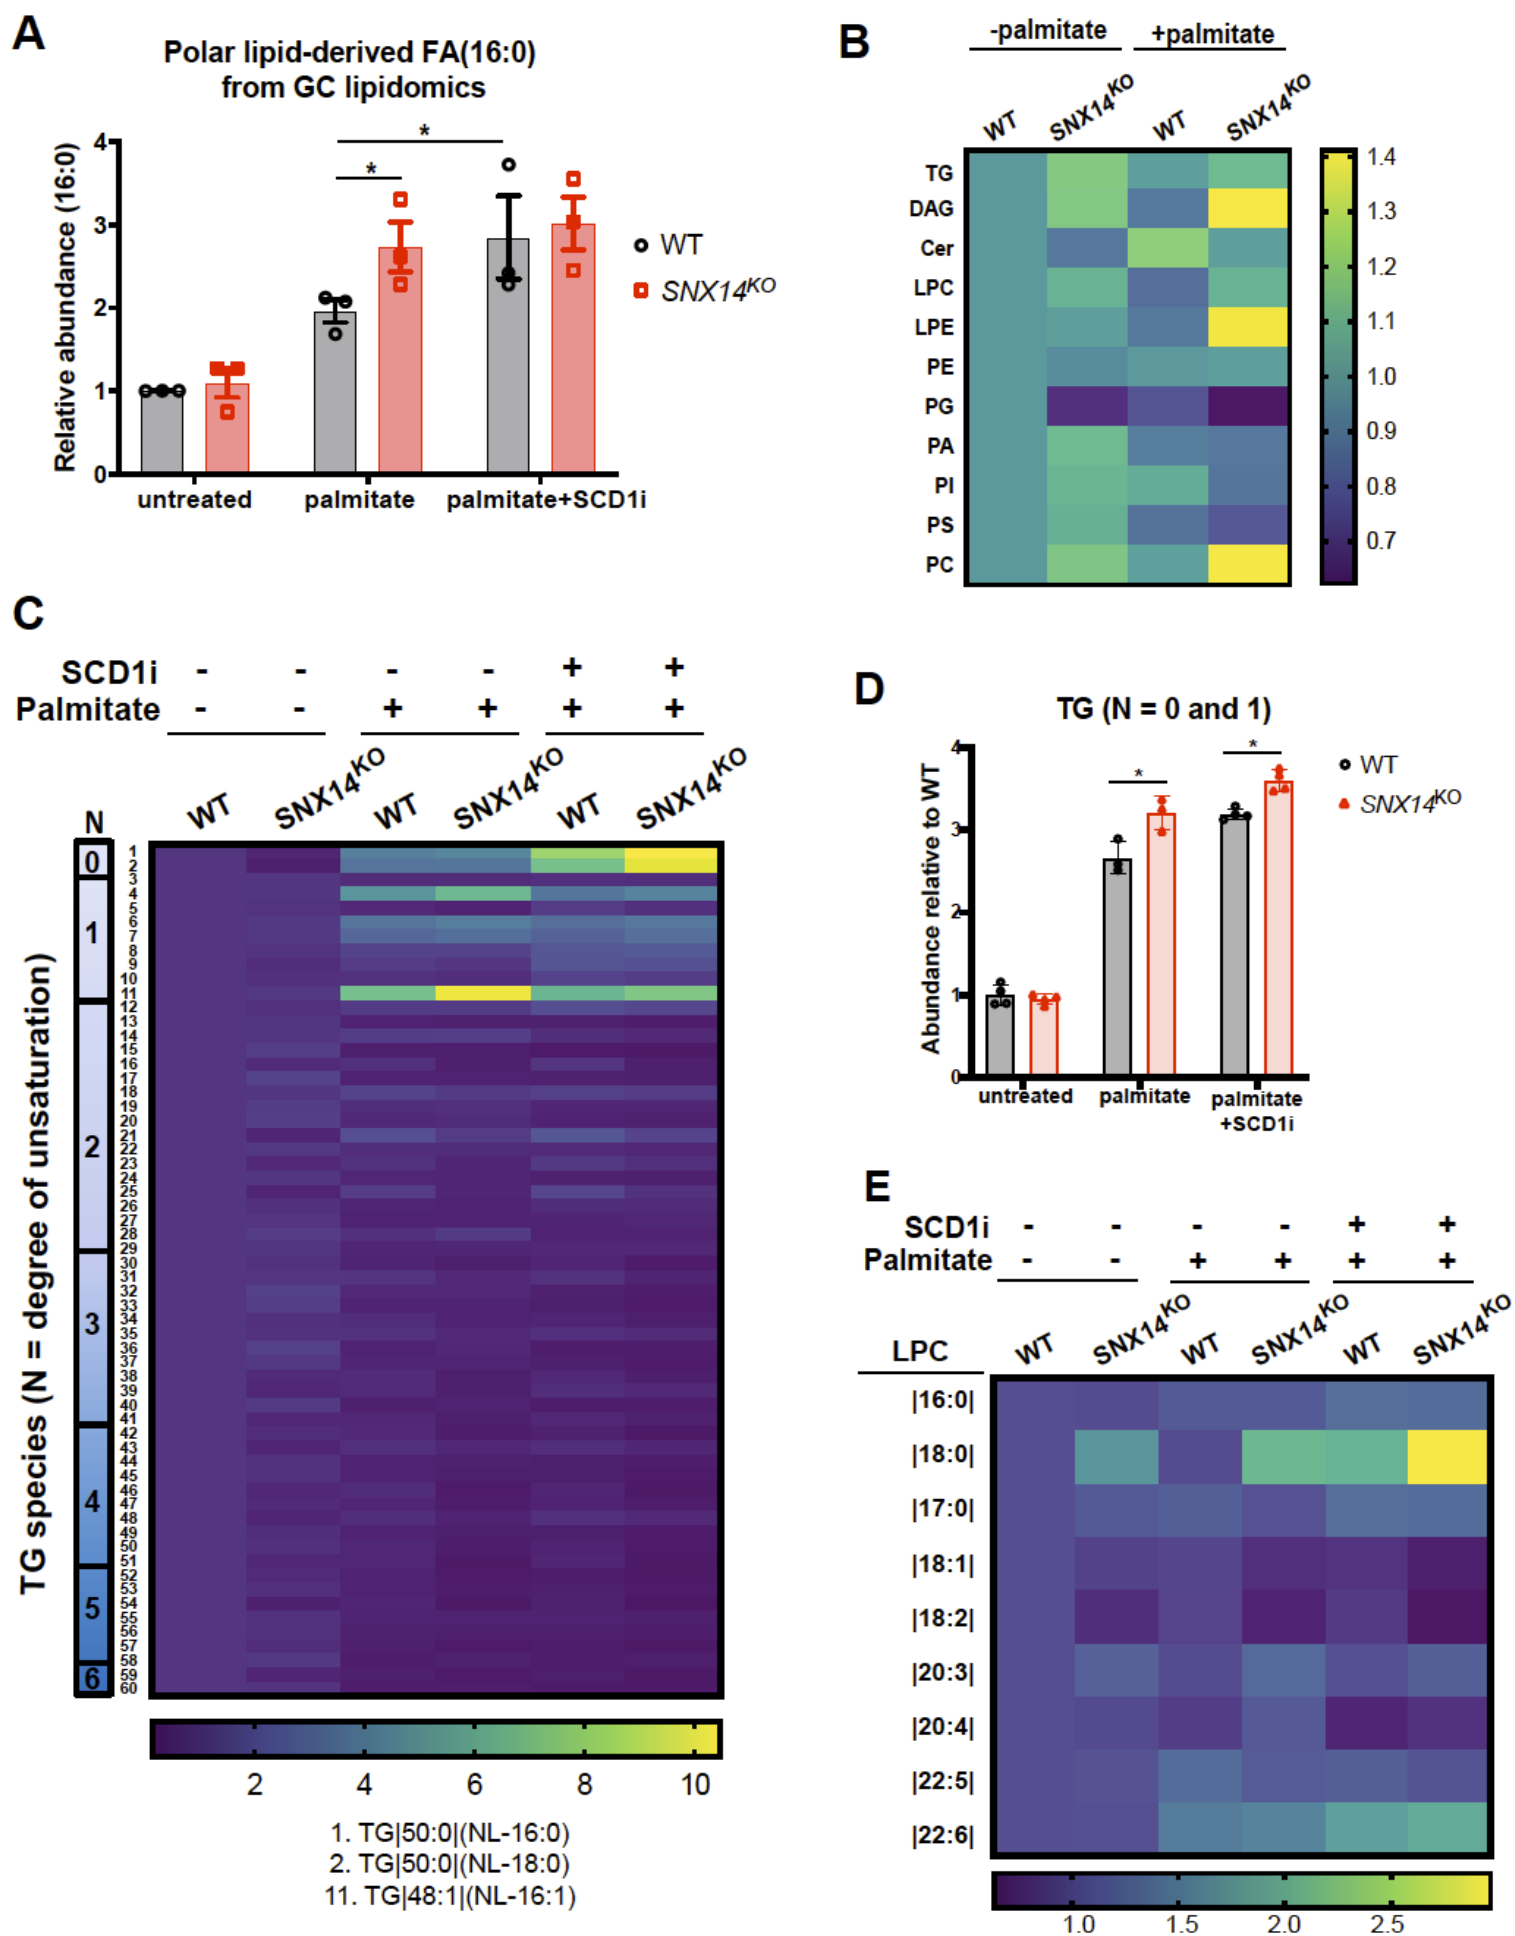

Figure 4

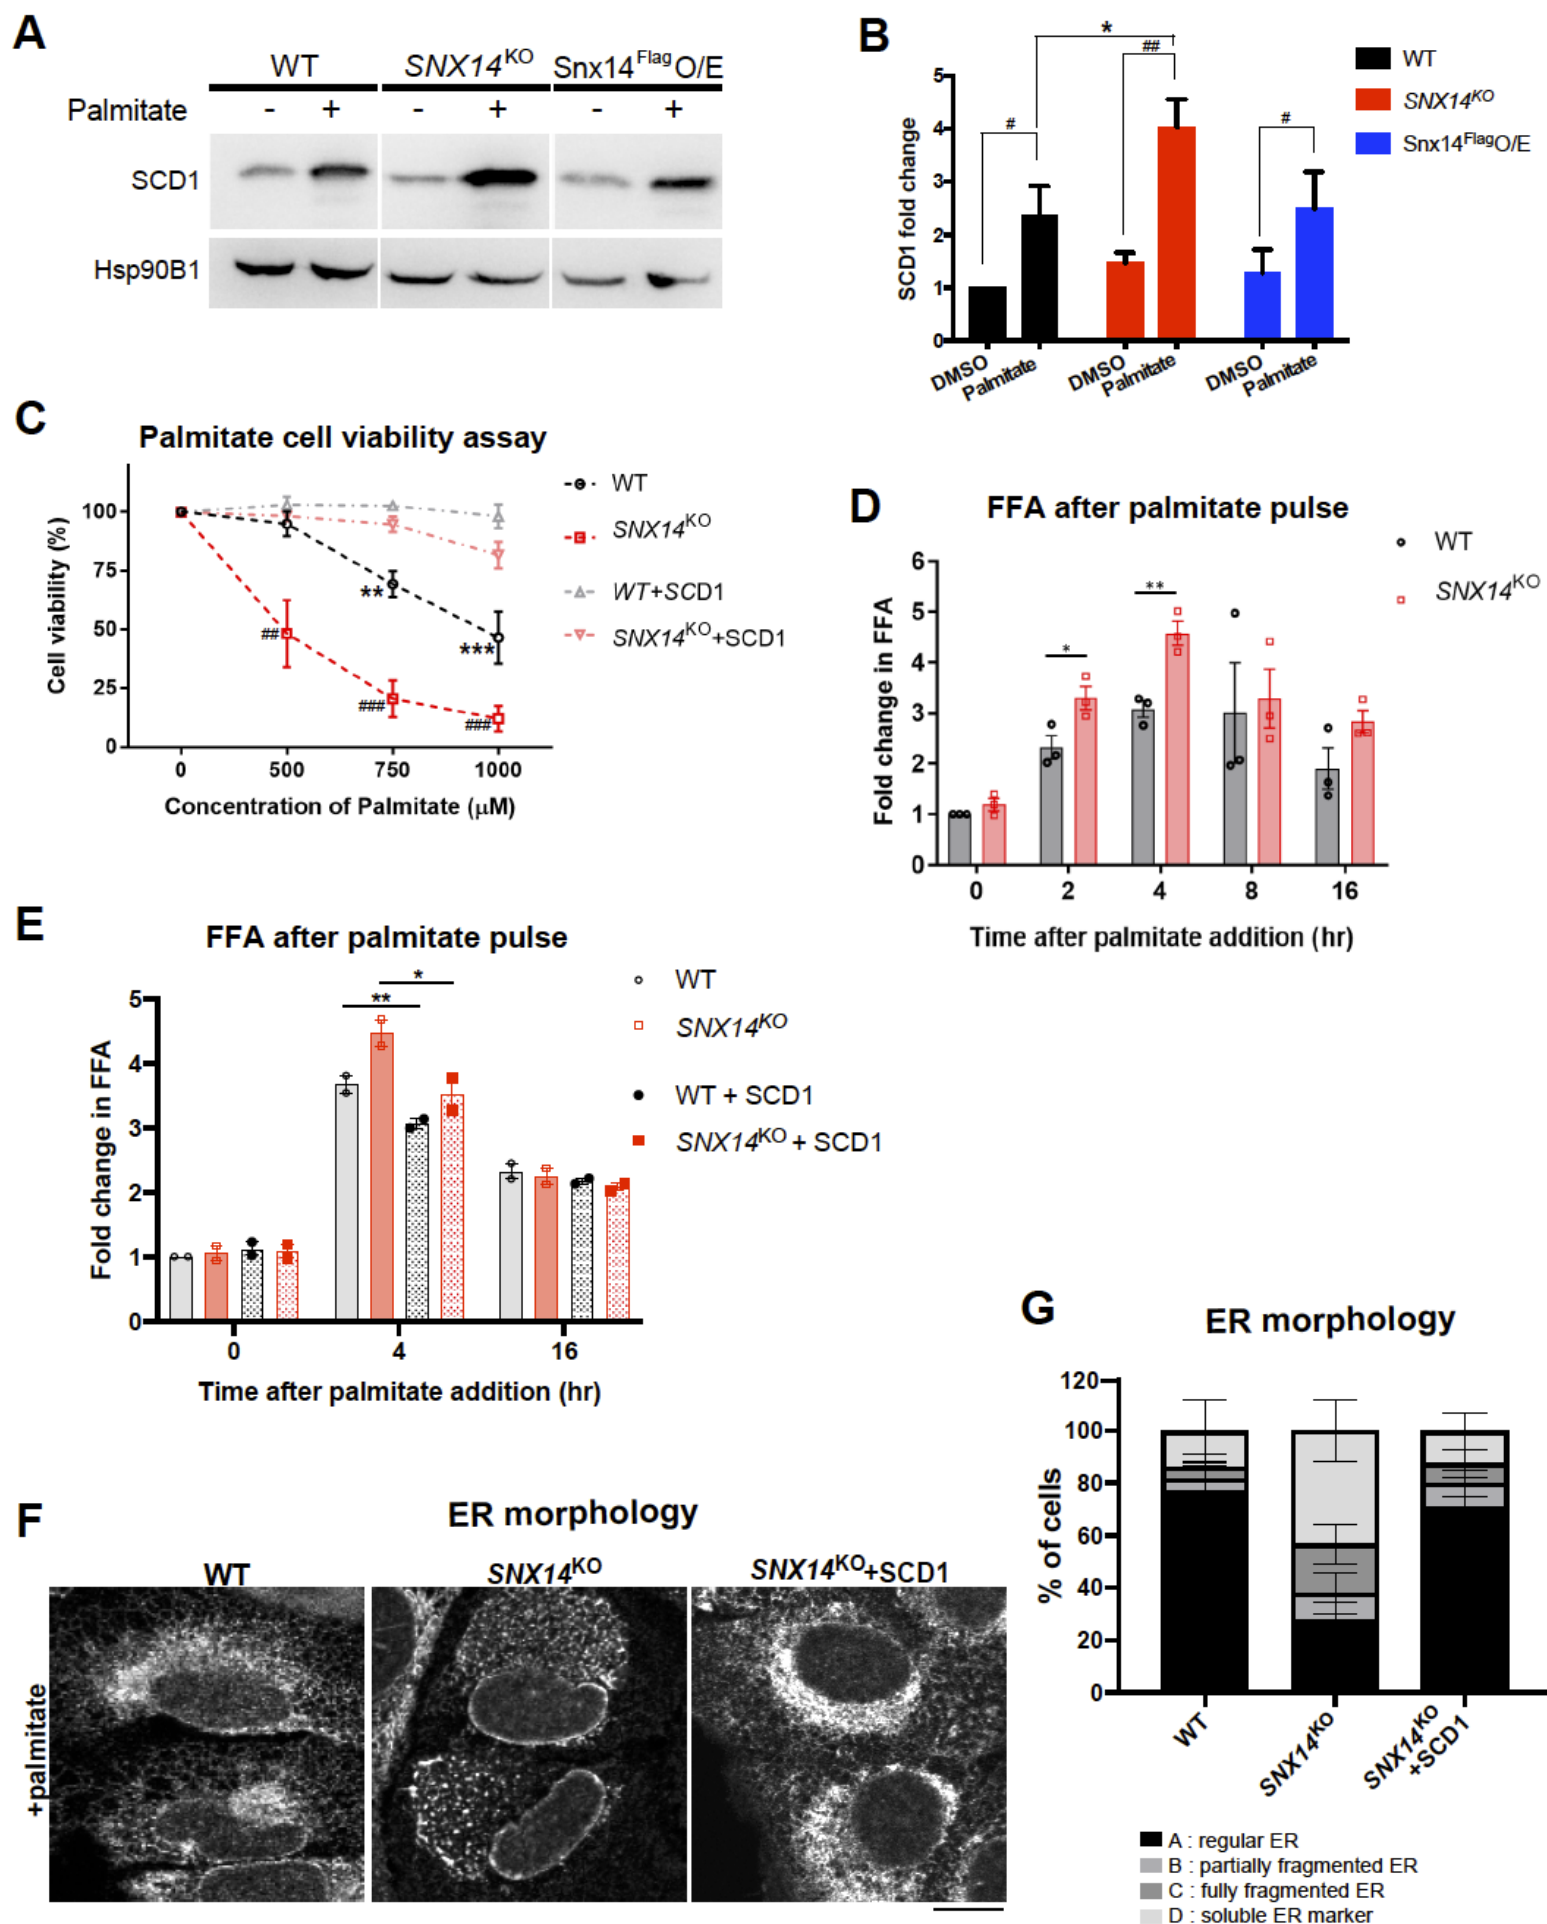

**Figure 5**

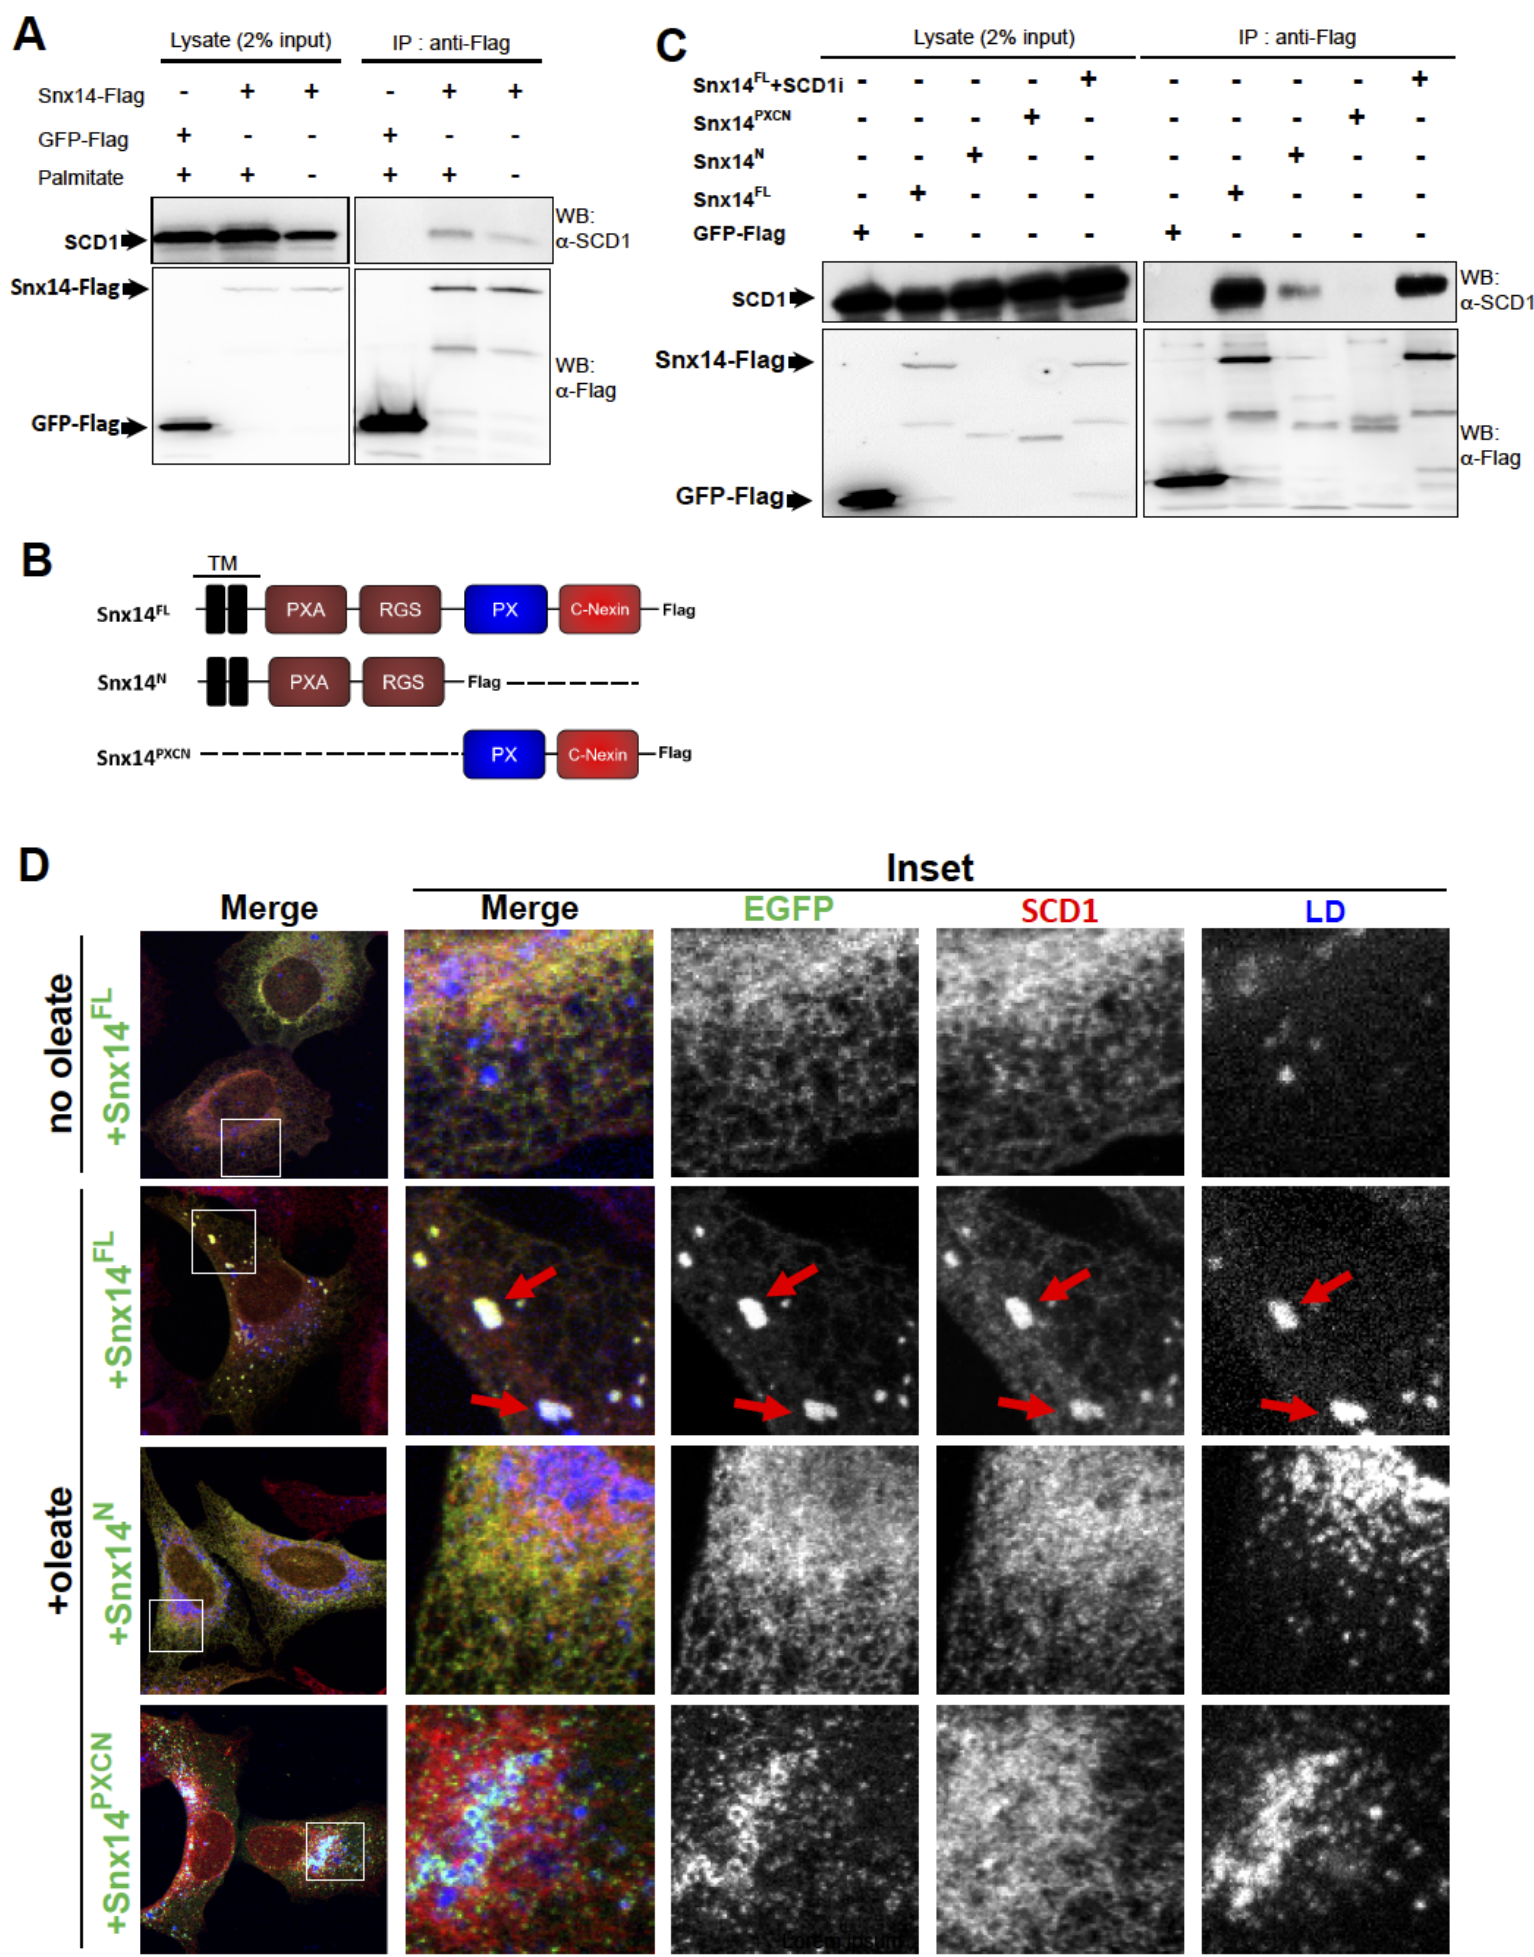

Figure 6

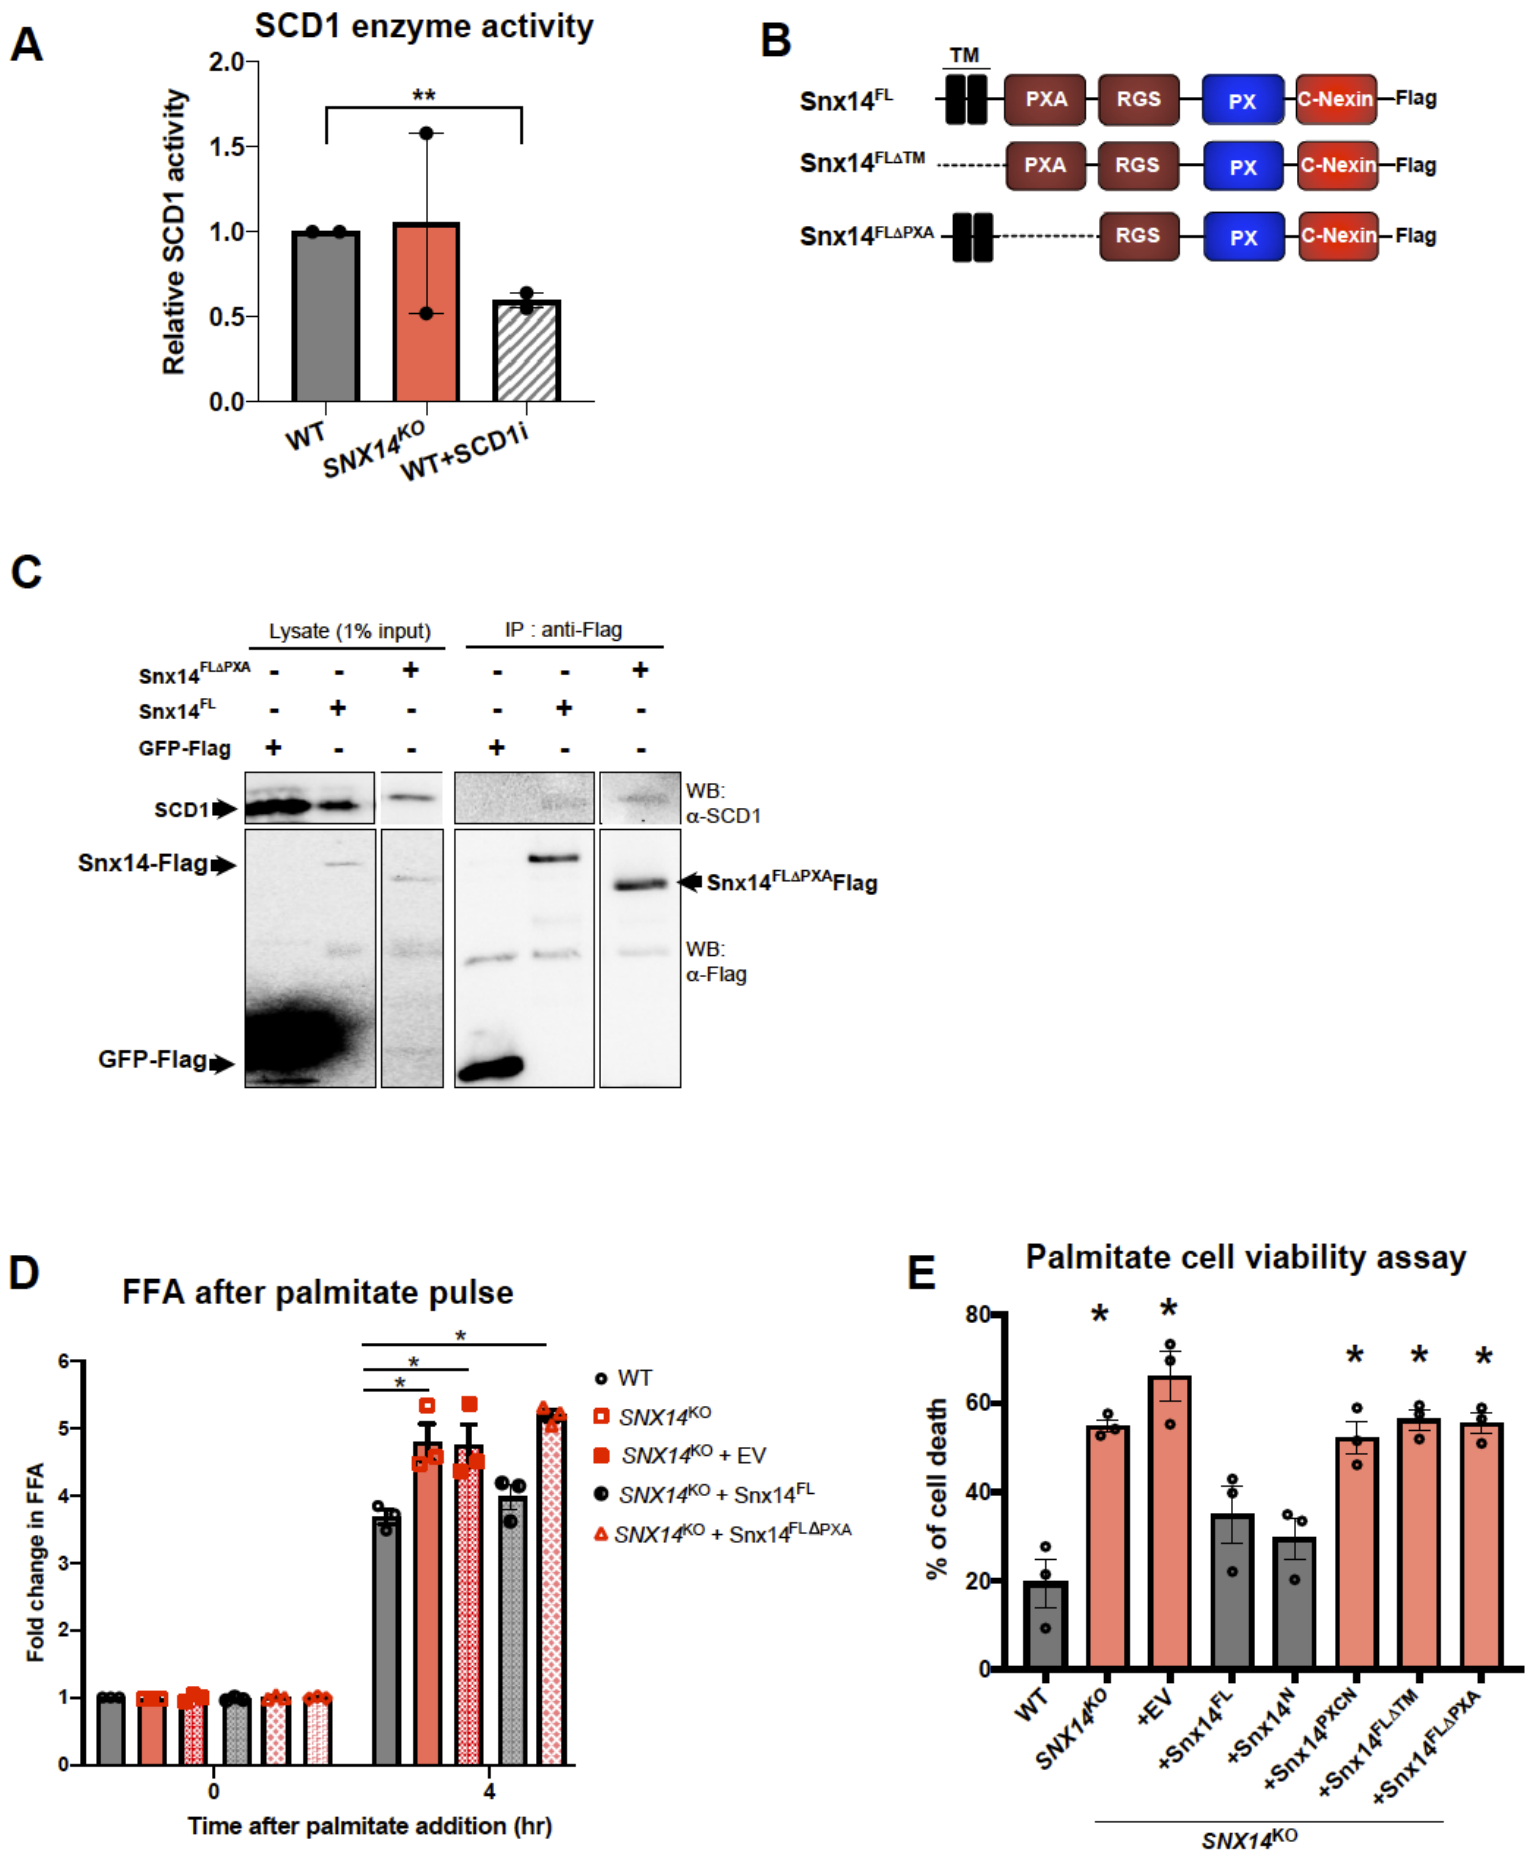

Figure 7



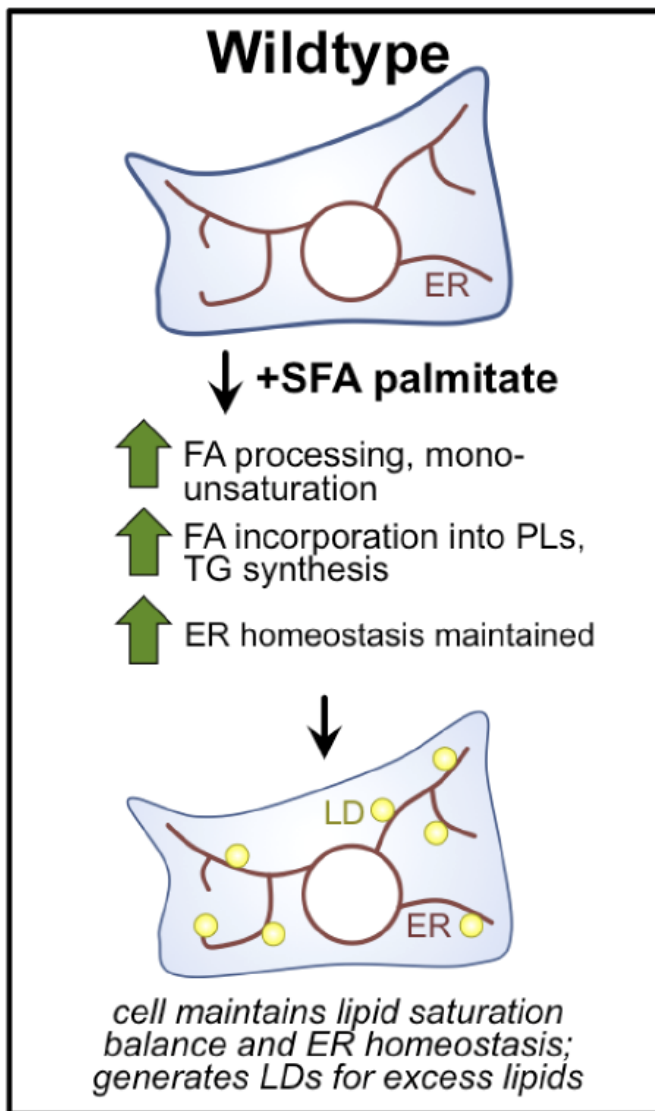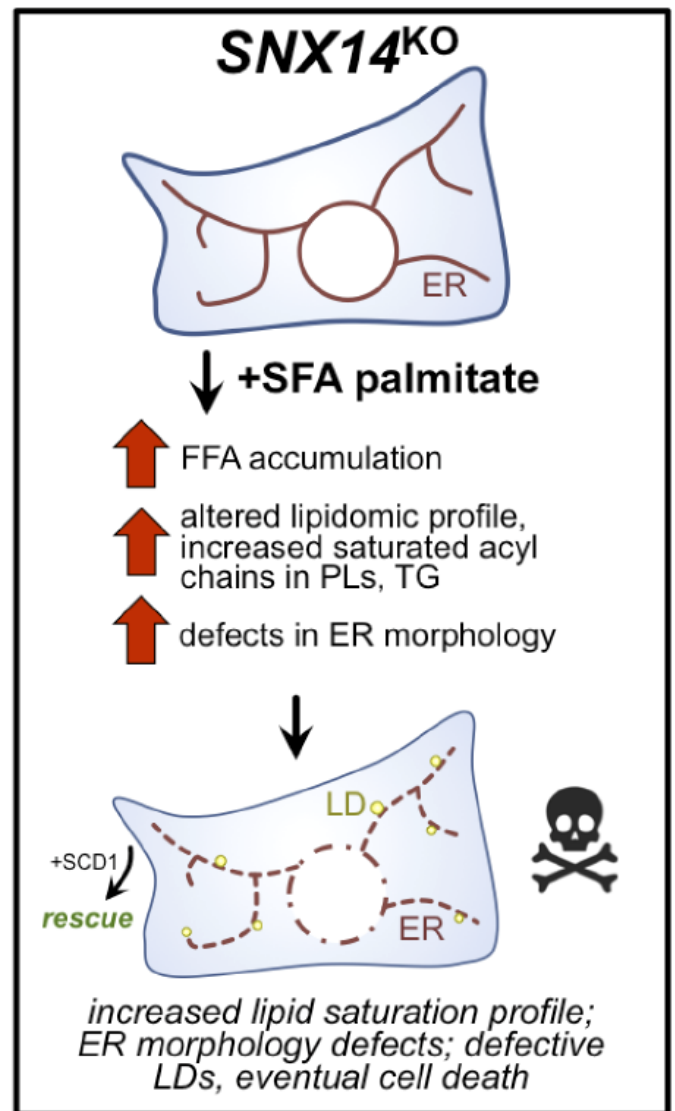

Figure 8

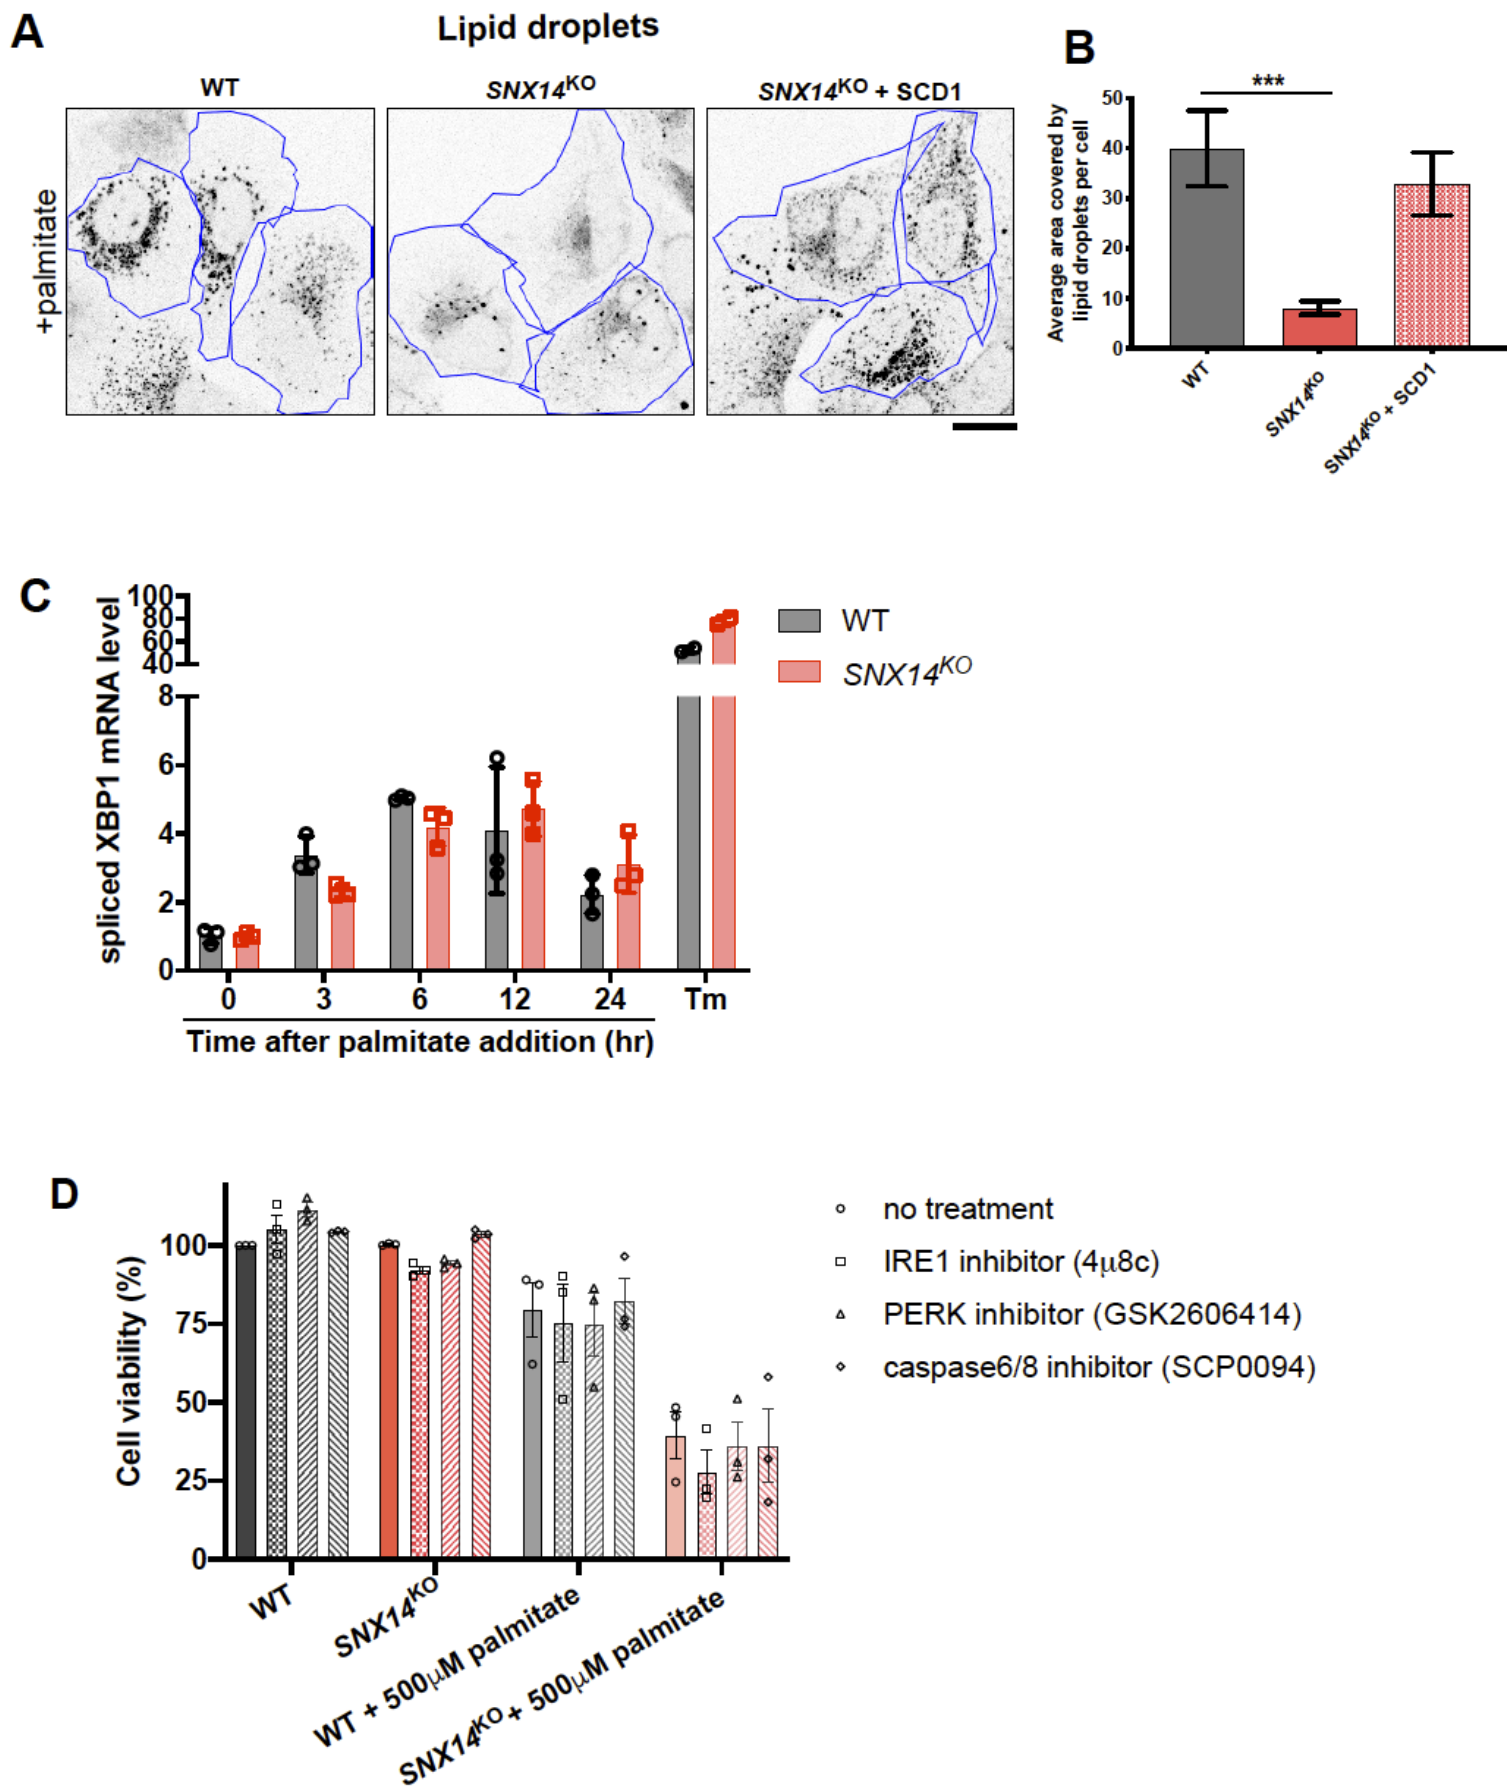

Supplementary Fig 2

### A Abundance of proteins in Snx14-EGFP-APEX2 relative to control

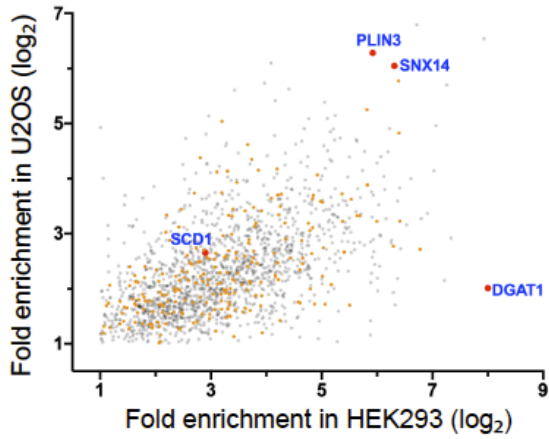

### B Abundance of proteins in EGFP-APEX2-Sec61β relative to control

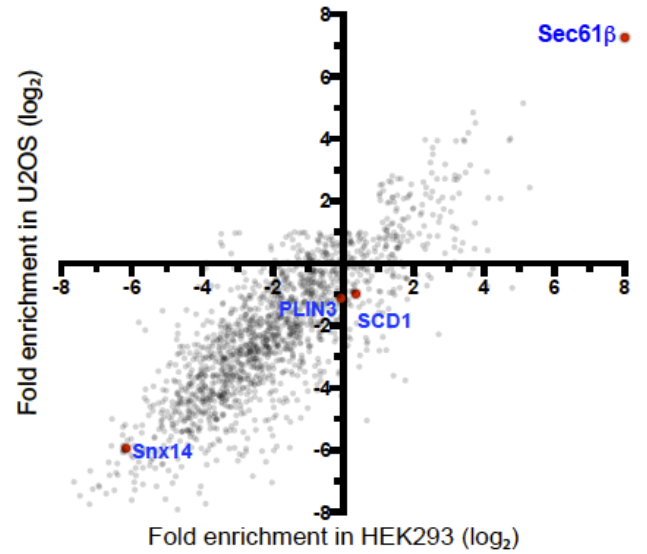

### C Cellular component

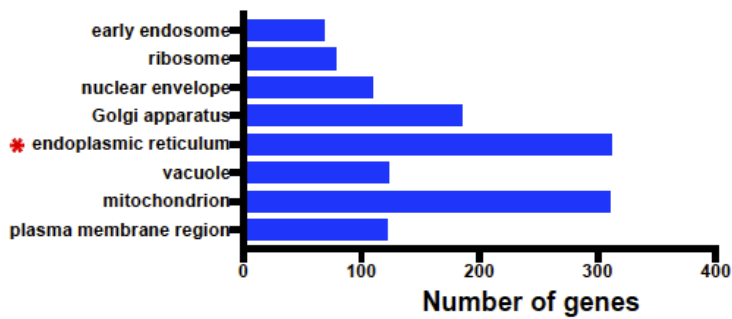

### D Molecular function

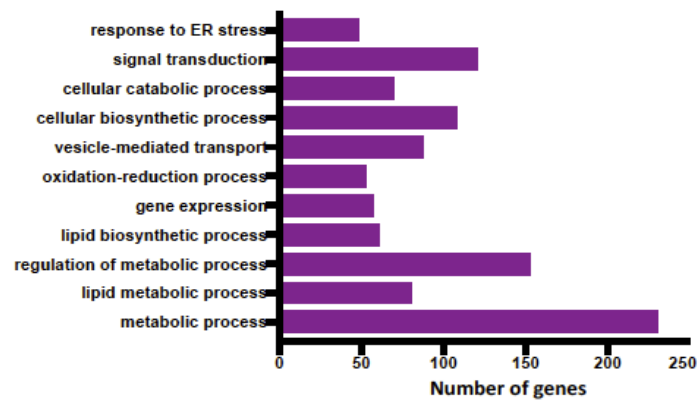

### E Frequency distribution

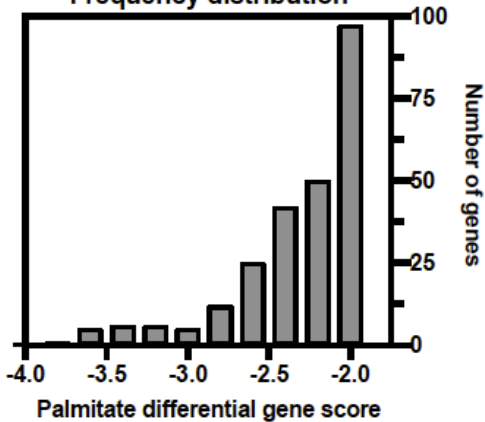

### F

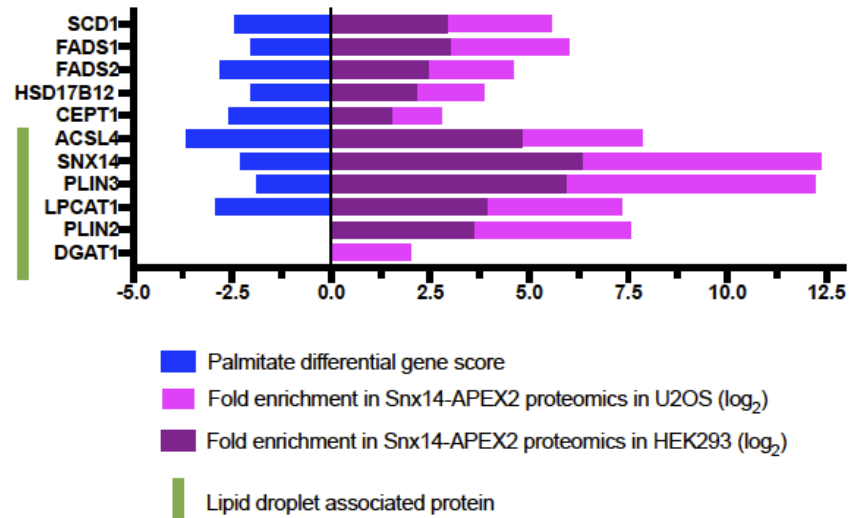

# A

## Polar-lipid derived FAs from GC lipidomics

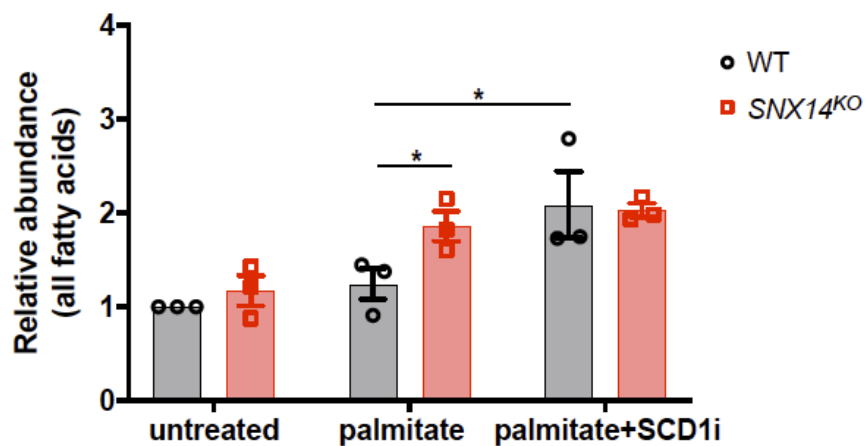

# B

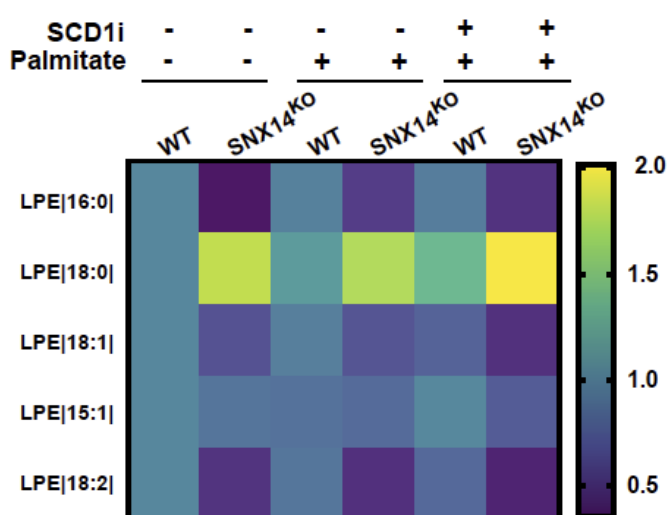

# D

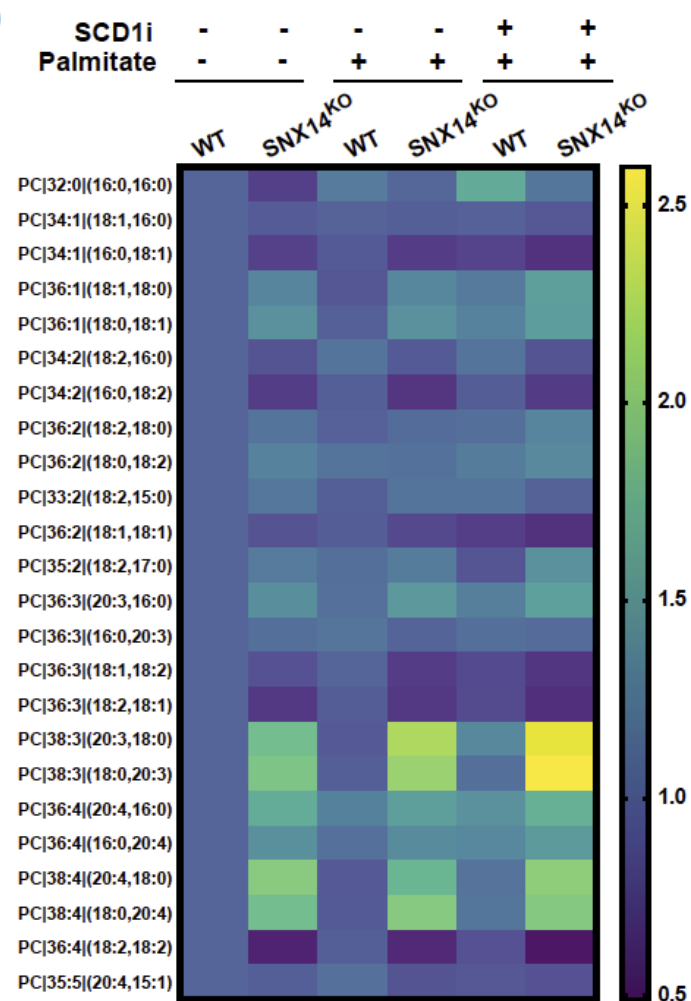

# C

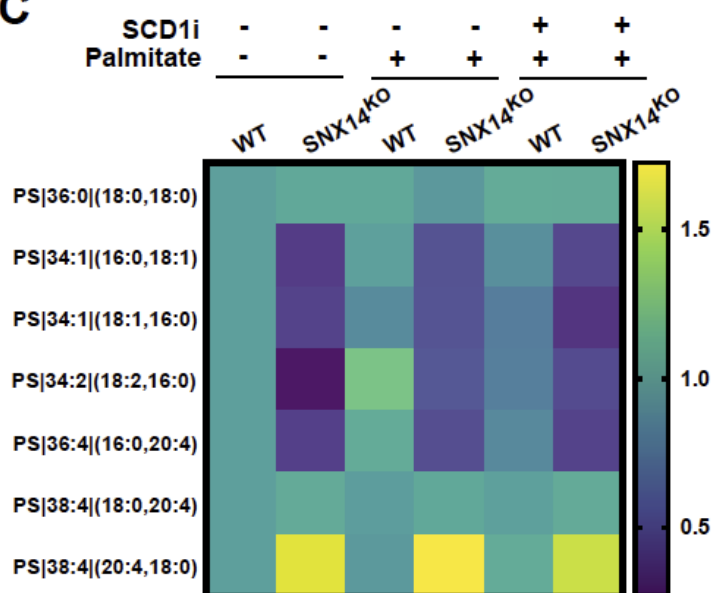

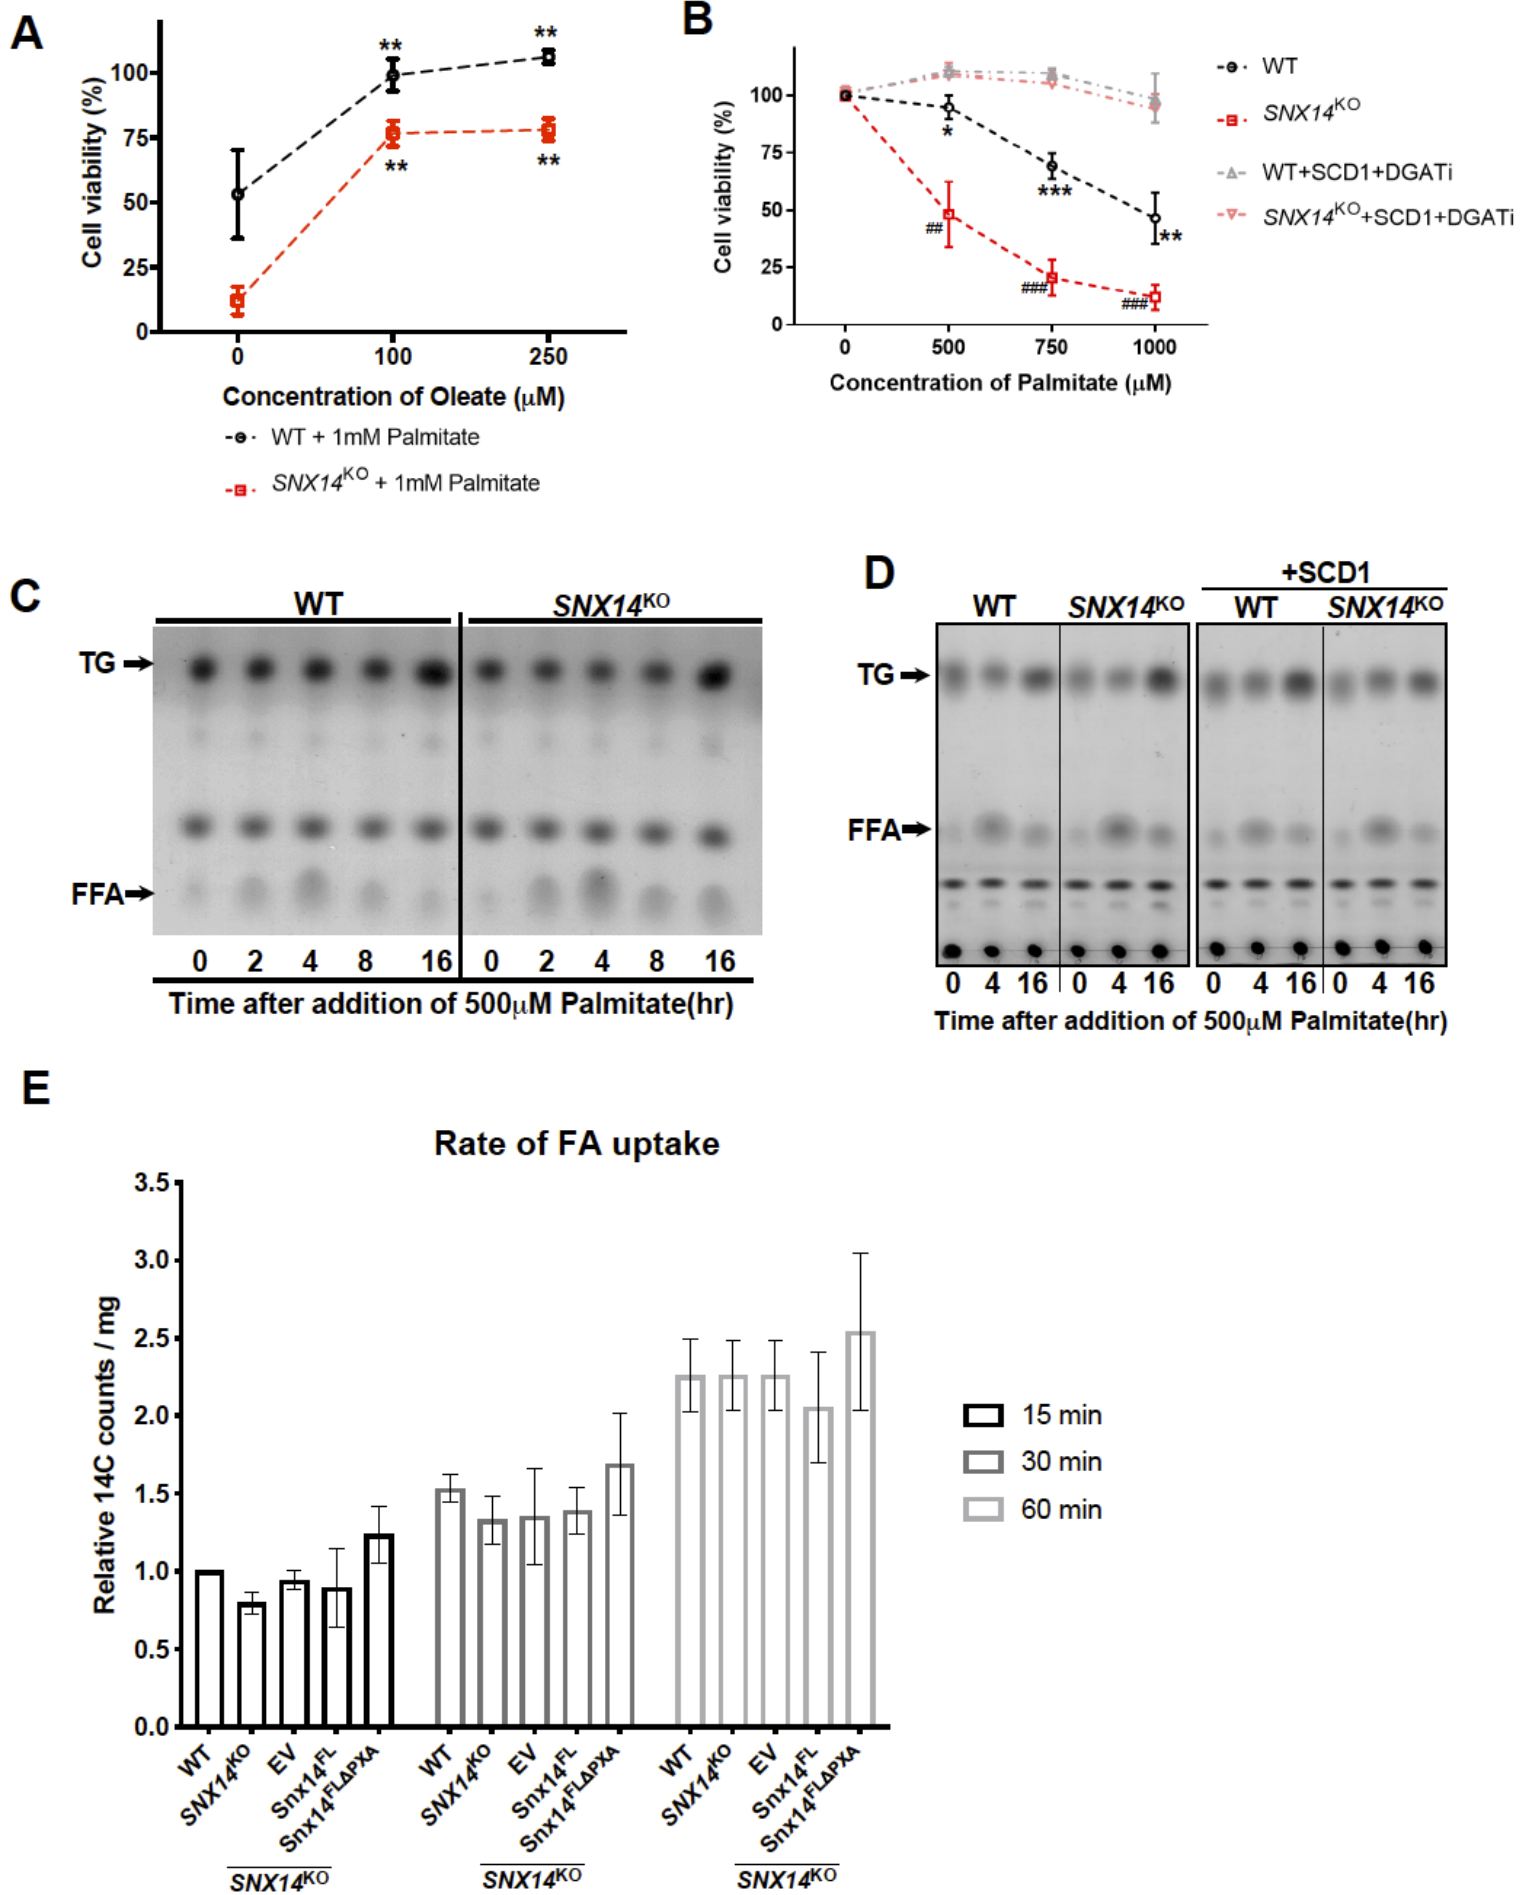

Supplementary Figure 5

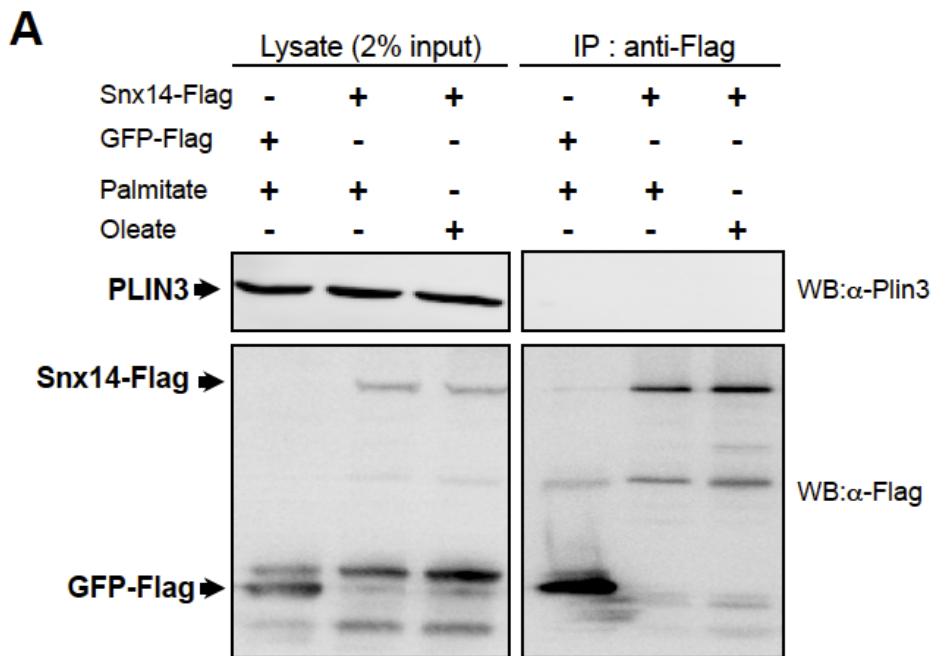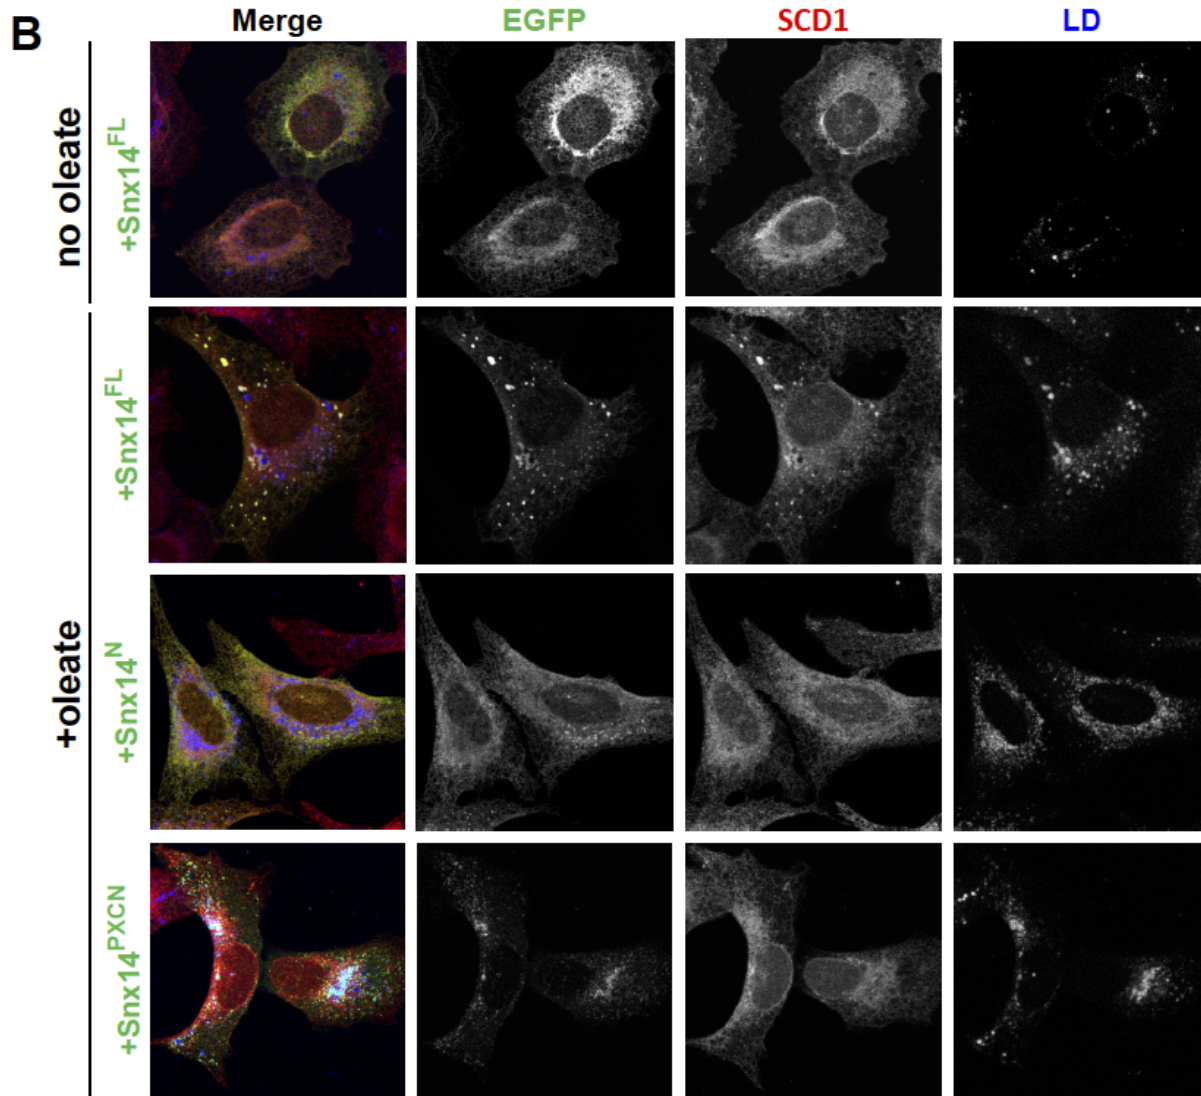

Supplementary Figure 6
